# Supplementary material for: High neural activity accelerates the decline of cognitive plasticity with age in Caenorhabditis elegans
Source: eLife. 2020 Nov 24;9:e59711. doi: 10.7554/eLife.59711 (PMC7685709; doi:10.7554/eLife.59711)
Supplement: Supplementary file 3. [file elife-59711-supp3.xlsx]

## Sheet: Tissue enrichment neuron sample
Tissue enrichment analysis wormbase
upregulated in neurons by FDR 0.1 fold change more than 1.5
sorted by enrichment fold change
	WW21_D1 vs. GFP21_D1
Term	Observed	Enrichment Fold Change	P value	Q value	Rank by enrichment fold change
URX WBbt:0006846	49	2.8	1.8e-17	2.4e-16	3/94
AQR WBbt:0003927	31	2.8	2.8e-12	2.3e-11	4/94
PQR WBbt:0004096	53	2.5	1.2e-15	1.4e-14	8/94
ASI WBbt:0005666	121	1.7	2.2e-12	1.8e-11	51/94
touch receptor neuron WBbt:0005237	745	1.3	5.3e-17	6.6e-16	79/94
3355 genes included in statistical testing, 703 genes have no annotated data or are excluded from testing
	WW21_D7 vs. GFP21_D7
Term	Observed	Enrichment Fold Change	P value	Q value	Rank by enrichment fold change
AQR WBbt:0003927	23	2.7	6e-08	6.6e-07	1/80
PQR WBbt:0004096	41	2.6	2.9e-11	5.3e-10	2/80
URX WBbt:0006846	34	2.5	2.4e-09	3.4e-08	3/80
ASI WBbt:0005666	84	1.6	1.8e-06	1.5e-05	36/80
touch receptor neuron WBbt:0005237	635	1.5	3.2e-26	4.5e-24	45/80
2621 genes included in statistical testing, 102 genes have no annotated data or are excluded from testing
	WW7_D1 vs. GFP7_D1
Term	Observed	Enrichment Fold Change	P value	Q value	Rank by enrichment fold change
URX WBbt:0006846	49	3	5.6e-19	9.5e-18	2/83
AQR WBbt:0003927	29	2.8	4e-11	2.8e-10	4/83
PQR WBbt:0004096	52	2.7	2.7e-16	3.2e-15	6/83
ASI WBbt:0005666	118	1.8	1.4e-13	1.3e-12	44/83
touch receptor neuron WBbt:0005237	696	1.3	2.5e-16	3.1e-15	75/83
3082 genes included in statistical testing, 481 genes have no annotated data or are excluded from testing
	WW7_D7 vs. GFP7_D7
Term	Observed	Enrichment Fold Change	P value	Q value	Rank by enrichment fold change
AQR WBbt:0003927	21	2.5	2.4e-06	2.6e-05	1/85
PQR WBbt:0004096	32	2	9.1e-06	9.3e-05	4/85
URX WBbt:0006846	25	1.8	0.00033	0.0024	15/85
touch receptor neuron WBbt:0005237	634	1.4	3e-24	8.7e-22	53/85
ASI WBbt:0005666	76	1.4	0.00039	0.0026	63/85
2745 genes included in statistical testing, 123 genes have no annotated data or are excluded from testing

## Sheet: activity-regulated genes EA
			colors illustrate overlap of enriched terms between day 1 and day 7 comparisons
			all: upregulated DEGs significant by FDR<0.1 and fold change >1.5
	Neurons 21%O2 D1 vs Neurons 7%O2 D1							Neurons 21%O2 D7 vs Neurons 7%O2 D7
	Phenotype Enrichment Analysis (wormbase)							Phenotype Enrichment Analysis (wormbase)
	Term	Observed	Enrichment Fold Change	P value	Q value			Term	Observed	Enrichment Fold Change	P value	Q value
	quiescence variant WBPhenotype:0001524	3	8.9	0.00038	0.088			body posture amplitude increased WBPhenotype:0002293	5	7	8.7e-05	0.02
	chemosensory behavior variant WBPhenotype:0001049	6	4.2	0.00066	0.088			forward locomotion increased WBPhenotype:0002346	6	5.5	0.00013	0.02
	pausing decreased WBPhenotype:0002309	4	5.6	0.00079	0.088			turning variant WBPhenotype:0002311	9	3.6	0.00024	0.02
	forward locomotion increased WBPhenotype:0002346	4	5.1	0.0012	0.088			bag of worms WBPhenotype:0000007	4	6.9	0.00029	0.02
	backward point velocity increased WBPhenotype:0002325	4	4.7	0.0017	0.088			sinusoidal movement variant WBPhenotype:0004018	10	3.1	0.00049	0.023
	turning variant WBPhenotype:0002311	6	3.4	0.0023	0.092			pausing decreased WBPhenotype:0002309	5	5	0.00052	0.023
	body posture wavelength increased WBPhenotype:0002296	3	5.4	0.0024	0.092			reversal variant WBPhenotype:0002320	9	3.2	0.00066	0.023
	foraging hyperactive WBPhenotype:0000237	4	4.2	0.0028	0.092			egg retention WBPhenotype:0000545	5	4.6	0.00085	0.025
	egg laying serotonin resistant WBPhenotype:0001068	2	6.4	0.0038	0.1			foraging reduced WBPhenotype:0000238	4	5.5	0.00088	0.025
	path curvature decreased WBPhenotype:0002337	3	4.6	0.0043	0.1			antihelmintic response variant WBPhenotype:0001852	3	6.6	0.0011	0.026
	75 genes included in statistical testing, 110 genes have no annotated data or are excluded from testing							body posture wavelength increased WBPhenotype:0002296	4	5.1	0.0011	0.026
								inhibitor of serotonin uptake variant WBPhenotype:0001598	3	5.8	0.0018	0.035
								path curvature decreased WBPhenotype:0002337	4	4.4	0.0023	0.041
								foraging hyperactive WBPhenotype:0000237	5	3.8	0.0023	0.041
								forward point velocity increased WBPhenotype:0002322	4	3.7	0.0048	0.075
								fat WBPhenotype:0000542	4	3.5	0.006	0.088
								backward point velocity increased WBPhenotype:0002325	4	3.4	0.0071	0.097
								78 genes included in statistical testing, 74 genes have no annotated data or are excluded from testing

## Sheet: overlap activity-reg genes D1D7
Neurons 21%O2 D1 vs Neurons 7%O2 D1	Neurons 21%O2 D7 vs Neurons 7%O2 D7			Genes overlapping between both sets	public names
upregulated 21% O2	upregulated 21% O2			WBGene00044679	K02B12.9
WBGene00003749	WBGene00219362			WBGene00011141	nlp-66
WBGene00003759	WBGene00003681			WBGene00001462	flp-19
WBGene00006818	WBGene00001054			WBGene00001549	gcy-25
WBGene00016530	WBGene00008795			WBGene00219362	ZK470.14
WBGene00044679	WBGene00007490			WBGene00001123	dyf-7
WBGene00011141	WBGene00001512			WBGene00001456	flp-13
WBGene00019144	WBGene00004719			WBGene00008342	frpr-5
WBGene00020134	WBGene00009750			WBGene00003647	nhr-57
WBGene00015531	WBGene00016894
WBGene00009257	WBGene00009145
WBGene00000368	WBGene00016845
WBGene00003549	WBGene00001675
WBGene00010558	WBGene00002088
WBGene00001462	WBGene00001462
WBGene00011745	WBGene00000481
WBGene00000269	WBGene00019840
WBGene00197598	WBGene00004345
WBGene00001638	WBGene00020800
WBGene00022086	WBGene00015494
WBGene00002174	WBGene00015751
WBGene00004944	WBGene00003570
WBGene00001549	WBGene00004403
WBGene00219362	WBGene00003986
WBGene00021872	WBGene00045495
WBGene00199515	WBGene00016018
WBGene00001123	WBGene00044679
WBGene00015632	WBGene00011545
WBGene00007549	WBGene00000920
WBGene00045336	WBGene00004926
WBGene00000085	WBGene00000241
WBGene00009450	WBGene00020472
WBGene00003839	WBGene00007707
WBGene00007614	WBGene00001819
WBGene00006139	WBGene00018678
WBGene00010262	WBGene00018665
WBGene00001458	WBGene00009924
WBGene00010795	WBGene00012465
WBGene00021340	WBGene00016114
WBGene00014248	WBGene00009172
WBGene00009025	WBGene00001537
WBGene00197048	WBGene00020627
WBGene00014093	WBGene00006490
WBGene00001456	WBGene00016145
WBGene00018607	WBGene00020936
WBGene00008762	WBGene00021515
WBGene00196251	WBGene00001448
WBGene00013561	WBGene00011141
WBGene00002149	WBGene00020003
WBGene00004776	WBGene00011412
WBGene00012143	WBGene00011795
WBGene00017271	WBGene00010854
WBGene00022026	WBGene00009771
WBGene00008320	WBGene00003157
WBGene00009577	WBGene00001549
WBGene00010079	WBGene00012461
WBGene00015359	WBGene00008580
WBGene00015793	WBGene00015790
WBGene00008868	WBGene00003953
WBGene00020692	WBGene00017818
WBGene00017530	WBGene00014107
WBGene00006678	WBGene00009834
WBGene00235118	WBGene00016005
WBGene00012939	WBGene00001446
WBGene00015246	WBGene00006604
WBGene00014244	WBGene00000286
WBGene00170929	WBGene00003775
WBGene00004876	WBGene00004804
WBGene00013284	WBGene00013030
WBGene00019486	WBGene00002113
WBGene00172963	WBGene00003499
WBGene00000726	WBGene00044484
WBGene00007595	WBGene00015660
WBGene00016623	WBGene00018255
WBGene00007934	WBGene00010165
WBGene00198183	WBGene00019324
WBGene00009315	WBGene00008489
WBGene00001898	WBGene00013921
WBGene00013897	WBGene00001123
WBGene00016588	WBGene00001456
WBGene00022639	WBGene00003046
WBGene00013100	WBGene00006364
WBGene00008342	WBGene00012920
WBGene00012851	WBGene00008342
WBGene00013176	WBGene00016343
WBGene00013564	WBGene00001129
WBGene00015483	WBGene00001178
WBGene00015903	WBGene00023314
WBGene00199815	WBGene00008027
WBGene00200464	WBGene00016503
WBGene00219957	WBGene00018688
WBGene00015897	WBGene00200830
WBGene00000136	WBGene00001182
WBGene00013964	WBGene00004207
WBGene00015423	WBGene00007686
WBGene00021848	WBGene00011956
WBGene00049322	WBGene00018078
WBGene00219604	WBGene00012634
WBGene00017614	WBGene00020368
WBGene00022771	WBGene00018258
WBGene00007395	WBGene00016630
WBGene00001397	WBGene00009742
WBGene00001330	WBGene00008885
WBGene00003647	WBGene00017290
WBGene00008309	WBGene00016349
WBGene00013321	WBGene00006894
WBGene00020128	WBGene00018281
WBGene00016066	WBGene00016260
WBGene00020148	WBGene00003591
WBGene00044202	WBGene00003647
WBGene00006733	WBGene00006735
WBGene00200129	WBGene00001452
WBGene00012275	WBGene00007017
WBGene00011185	WBGene00019347
WBGene00000541	WBGene00196518
WBGene00017427	WBGene00008860
WBGene00200153	WBGene00016903
WBGene00002267	WBGene00004793
WBGene00002112	WBGene00009058
WBGene00000530	WBGene00011823
WBGene00023500	WBGene00000903
WBGene00020922	WBGene00009001
WBGene00001984	WBGene00012895
WBGene00008548	WBGene00022245
WBGene00009125	WBGene00022350
WBGene00011372	WBGene00011663
WBGene00017692	WBGene00004822
WBGene00019343	WBGene00015519
WBGene00021000	WBGene00004056
WBGene00196604	WBGene00043054
WBGene00014227	WBGene00010166
WBGene00011068	WBGene00018016
WBGene00017788	WBGene00020758
WBGene00202299	WBGene00001523
WBGene00200506	WBGene00013506
WBGene00219901	WBGene00017065
WBGene00016021	WBGene00000013
WBGene00010772	WBGene00010124
WBGene00015408	WBGene00011888
WBGene00021043	WBGene00003674
WBGene00016763	WBGene00021807
WBGene00006213	WBGene00044067
WBGene00022623	WBGene00009529
WBGene00043994	WBGene00018958
WBGene00005468	WBGene00001541
WBGene00003390	WBGene00009389
WBGene00005193	WBGene00017269
WBGene00021415	WBGene00018249
WBGene00020986	WBGene00002182
WBGene00016428	WBGene00006743
WBGene00000995	WBGene00012413
WBGene00013902	WBGene00015815
WBGene00007474	WBGene00020756
WBGene00013285
WBGene00013641
WBGene00198454
WBGene00019512
WBGene00000022
WBGene00022154
WBGene00012122
WBGene00020502
WBGene00003528
WBGene00010847
WBGene00044412
WBGene00199878
WBGene00009271
WBGene00219905
WBGene00007650
WBGene00016747
WBGene00010051
WBGene00007744
WBGene00021911
WBGene00012145
WBGene00015558
WBGene00008832
WBGene00000515
WBGene00001374
WBGene00001457
WBGene00006610
WBGene00008365
WBGene00001480
WBGene00007957
WBGene00011540
WBGene00015478
WBGene00198571
WBGene00010179
