# Supplementary material for: High neural activity accelerates the decline of cognitive plasticity with age in Caenorhabditis elegans
Source: eLife. 2020 Nov 24;9:e59711. doi: 10.7554/eLife.59711 (PMC7685709; doi:10.7554/eLife.59711)
Supplement: Supplementary file 4. [file elife-59711-supp4.xlsx]

## Sheet: enriched in O2 neurons
gene_id	symbol	Expression in AQR PQR URX	max.cell.type	max.cell.type.expr	cell.type.2	cell.type.2.expr	ratio	pval	qval
WBGene00001557	gcy-37	5452.88	Oxygen_sensory_neurons	1394.51	Touch_receptor_neurons	19.0096	69.6919	2.29262e-24	1.13351e-22
WBGene00001552	gcy-32	2331.12	Oxygen_sensory_neurons	596.154	Other_interneurons	19.1624	29.5675	1.91392e-12	4.4904e-11				Publication: Cao et al., Science 357, 661–667 (2017)
WBGene00001556	gcy-36	2420.08	Oxygen_sensory_neurons	618.907	Am/PH_sheath_cells	17.2736	33.8689	8.4038e-12	1.88028e-10				https://science.sciencemag.org/content/357/6352/661
WBGene00001555	gcy-35	1694.51	Oxygen_sensory_neurons	867.478	Touch_receptor_neurons	86.1932	9.94892	5.77449e-09	1.00304e-07
WBGene00003570	ncx-5	1975.67	Oxygen_sensory_neurons	570.885	Pharyngeal_muscle	22.2816	24.5208	1.05936e-08	1.79401e-07
WBGene00011141	R08B4.5	844.727	Oxygen_sensory_neurons	216.029	Coelomocytes	3.7427	45.5497	1.61068e-07	2.42391e-06
WBGene00016619	C43H6.6	911.379	Oxygen_sensory_neurons	253.54	Ciliated_sensory_neurons	8.10719	27.8395	2.90599e-07	4.20466e-06
WBGene00007614	gnrr-2	934.759	Oxygen_sensory_neurons	271.869	Cholinergic_neurons	25.3127	10.3322	2.58459e-05	0.000275748
WBGene00000562	cng-1	1223.15	Oxygen_sensory_neurons	438.809	Touch_receptor_neurons	49.3818	8.70967	4.62023e-05	0.000473971
WBGene00013118	Y51H4A.24	790.773	Oxygen_sensory_neurons	202.23	Intestine	48.5837	4.07856	0.000111128	0.00104775
WBGene00001451	flp-8	12118.1	Oxygen_sensory_neurons	3099.06	Touch_receptor_neurons	1470.74	2.10571	0.000174656	0.00157144
WBGene00015964	glb-5	1140.35	Oxygen_sensory_neurons	331.752	flp-1(+)_interneurons	34.8772	9.24687	0.000713857	0.00560441
WBGene00019070	F58H7.5	181.832	Oxygen_sensory_neurons	46.5014	Germline	4.20785	8.9291	0.000815361	0.00630365
WBGene00014160	ZK938.3	384.47	Oxygen_sensory_neurons	98.3234	Ciliated_sensory_neurons	2.5267	27.8797	0.00163146	0.0117618
WBGene00021766	hex-4	494.875	Oxygen_sensory_neurons	163.217	Germline	114.518	1.41292	0.00175242	0.0125215
WBGene00022419	Y102A11A.9	1505.56	Oxygen_sensory_neurons	563.426	Ciliated_sensory_neurons	239.473	2.34299	0.0062494	0.0374465
WBGene00001549	gcy-25	335.744	Oxygen_sensory_neurons	85.8625	Vulval_precursors	5.05385	14.1831	0.00936555	0.0526335
WBGene00018153	F37C12.10	81.9202	Oxygen_sensory_neurons	20.9501	Germline	1.74849	7.62239	0.0230128	0.110648
WBGene00019497	K07E8.6	253.036	Oxygen_sensory_neurons	64.711	Body_wall_muscle	31.6706	1.98071	0.0299333	0.137063
WBGene00011326	T01D3.1	6398.37	Oxygen_sensory_neurons	1865.57	Other_interneurons	1237.97	1.50574	0.0339395	0.151007
WBGene00016090	aexr-2	779.649	Oxygen_sensory_neurons	199.386	Coelomocytes	65.3849	3.00348	0.0367791	0.161234
WBGene00045475	T07A5.7	129.5	Oxygen_sensory_neurons	33.1181	Germline	9.09941	3.27921	0.0406744	0.174283
WBGene00010349	dyf-18	465.047	Oxygen_sensory_neurons	133.633	Ciliated_sensory_neurons	36.4331	3.56991	0.0742146	0.27323
WBGene00001123	dyf-7	168.273	Oxygen_sensory_neurons	43.0338	Am/PH_sheath_cells	4.77304	7.45426	0.0814036	0.292266
