# Supplementary material for: High neural activity accelerates the decline of cognitive plasticity with age in Caenorhabditis elegans
Source: eLife. 2020 Nov 24;9:e59711. doi: 10.7554/eLife.59711 (PMC7685709; doi:10.7554/eLife.59711)
Supplement: Supplementary file 5. [file elife-59711-supp5.xlsx]

## Sheet: WW_D1_O2_neg
NAME	GS<br> follow link to MSigDB	GS DETAILS	SIZE	ES	NES	NOM p-val	FDR q-val	FWER p-val	RANK AT MAX	LEADING EDGE
GO:0006412_TRANSLATION	GO:0006412_TRANSLATION	Details ...	198	-0.61369	-2.55622	0	0	0	3016	tags=52%, list=16%, signal=61%
GO:0051321_MEIOTIC_CELL_CYCLE	GO:0051321_MEIOTIC_CELL_CYCLE	Details ...	85	-0.679143	-2.49983	0	0	0	2737	tags=56%, list=14%, signal=66%
GO:0048477_OOGENESIS	GO:0048477_OOGENESIS	Details ...	44	-0.769027	-2.49352	0	0	0	2684	tags=66%, list=14%, signal=77%
GO:0042254_RIBOSOME_BIOGENESIS	GO:0042254_RIBOSOME_BIOGENESIS	Details ...	42	-0.758071	-2.48135	0	0	0	3743	tags=79%, list=20%, signal=98%
GO:0006364_RRNA_PROCESSING	GO:0006364_RRNA_PROCESSING	Details ...	60	-0.726229	-2.45438	0	0	0	3921	tags=72%, list=21%, signal=90%
GO:0006974_CELLULAR_RESPONSE_TO_DNA_DAMAGE_STIMULUS	GO:0006974_CELLULAR_RESPONSE_TO_DNA_DAMAGE_STIMULUS	Details ...	66	-0.708566	-2.44367	0	0	0	2613	tags=53%, list=14%, signal=61%
GO:0006606_PROTEIN_IMPORT_INTO_NUCLEUS	GO:0006606_PROTEIN_IMPORT_INTO_NUCLEUS	Details ...	25	-0.83186	-2.38889	0	0	0	2673	tags=80%, list=14%, signal=93%
GO:0051301_CELL_DIVISION	GO:0051301_CELL_DIVISION	Details ...	125	-0.615739	-2.37865	0	0	0	3354	tags=53%, list=18%, signal=64%
GO:0007049_CELL_CYCLE	GO:0007049_CELL_CYCLE	Details ...	153	-0.594339	-2.36007	0	0	0	3354	tags=52%, list=18%, signal=63%
GO:0006281_DNA_REPAIR	GO:0006281_DNA_REPAIR	Details ...	114	-0.611649	-2.33651	0	0	0	2613	tags=44%, list=14%, signal=51%
GO:0006260_DNA_REPLICATION	GO:0006260_DNA_REPLICATION	Details ...	54	-0.675421	-2.306	0	0	0	3828	tags=54%, list=20%, signal=67%
GO:0006418_TRNA_AMINOACYLATION_FOR_PROTEIN_TRANSLATION	GO:0006418_TRNA_AMINOACYLATION_FOR_PROTEIN_TRANSLATION	Details ...	27	-0.781652	-2.30033	0	0	0	3016	tags=74%, list=16%, signal=88%
GO:0010501_RNA_SECONDARY_STRUCTURE_UNWINDING	GO:0010501_RNA_SECONDARY_STRUCTURE_UNWINDING	Details ...	36	-0.733876	-2.29241	0	0	0	3935	tags=75%, list=21%, signal=94%
GO:0000462_MATURATION_OF_SSU-RRNA_FROM_TRICISTRONIC_RRNA_TRANSCRIPT_(SSU-RRNA,_5.8S_RRNA,_LSU-RRNA)	GO:0000462_MATURATION_OF_SSU-RRNA_FROM_TRICISTRONIC_RRNA_TRANSCRIPT_(SSU-RRNA,_5.8S_RRNA,_LSU-RRNA)	Details ...	26	-0.776187	-2.20999	0	0	0	3617	tags=77%, list=19%, signal=95%
GO:0090305_NUCLEIC_ACID_PHOSPHODIESTER_BOND_HYDROLYSIS	GO:0090305_NUCLEIC_ACID_PHOSPHODIESTER_BOND_HYDROLYSIS	Details ...	49	-0.64958	-2.15654	0	6.28352e-05	0.001	2898	tags=47%, list=15%, signal=55%
GO:0006396_RNA_PROCESSING	GO:0006396_RNA_PROCESSING	Details ...	38	-0.65727	-2.07596	0	0.000417634	0.007	3123	tags=50%, list=16%, signal=60%
GO:0007283_SPERMATOGENESIS	GO:0007283_SPERMATOGENESIS	Details ...	45	-0.636573	-2.0701	0	0.000393067	0.007	2889	tags=58%, list=15%, signal=68%
GO:0030163_PROTEIN_CATABOLIC_PROCESS	GO:0030163_PROTEIN_CATABOLIC_PROCESS	Details ...	30	-0.687668	-2.06787	0	0.00037123	0.007	2024	tags=53%, list=11%, signal=60%
GO:0000470_MATURATION_OF_LSU-RRNA	GO:0000470_MATURATION_OF_LSU-RRNA	Details ...	14	-0.817538	-2.06089	0	0.000404711	0.008	1297	tags=50%, list=7%, signal=54%
GO:0006417_REGULATION_OF_TRANSLATION	GO:0006417_REGULATION_OF_TRANSLATION	Details ...	36	-0.667076	-2.05275	0	0.000526683	0.011	2040	tags=50%, list=11%, signal=56%
GO:0017148_NEGATIVE_REGULATION_OF_TRANSLATION	GO:0017148_NEGATIVE_REGULATION_OF_TRANSLATION		21	-0.74526	-2.0413	0	0.000501602	0.011	1949	tags=48%, list=10%, signal=53%
GO:0008033_TRNA_PROCESSING	GO:0008033_TRNA_PROCESSING		38	-0.64477	-2.03875	0	0.000478802	0.011	3886	tags=55%, list=20%, signal=69%
GO:0042273_RIBOSOMAL_LARGE_SUBUNIT_BIOGENESIS	GO:0042273_RIBOSOMAL_LARGE_SUBUNIT_BIOGENESIS		14	-0.80868	-2.01016	0	0.000665676	0.016	2604	tags=71%, list=14%, signal=83%
GO:0007059_CHROMOSOME_SEGREGATION	GO:0007059_CHROMOSOME_SEGREGATION		37	-0.638231	-2.00088	0	0.000834949	0.021	3626	tags=51%, list=19%, signal=63%
GO:0006397_MRNA_PROCESSING	GO:0006397_MRNA_PROCESSING		71	-0.559741	-1.99103	0	0.000877216	0.023	4056	tags=54%, list=21%, signal=68%
GO:0000070_MITOTIC_SISTER_CHROMATID_SEGREGATION	GO:0000070_MITOTIC_SISTER_CHROMATID_SEGREGATION		25	-0.691759	-1.9597	0	0.00148124	0.038	4514	tags=72%, list=24%, signal=94%
GO:0051028_MRNA_TRANSPORT	GO:0051028_MRNA_TRANSPORT		17	-0.755011	-1.95221	0	0.00174227	0.047	2904	tags=65%, list=15%, signal=76%
GO:0000281_MITOTIC_CYTOKINESIS	GO:0000281_MITOTIC_CYTOKINESIS		24	-0.671282	-1.94646	0.0026178	0.00181689	0.051	2163	tags=42%, list=11%, signal=47%
GO:0032543_MITOCHONDRIAL_TRANSLATION	GO:0032543_MITOCHONDRIAL_TRANSLATION		27	-0.656557	-1.94275	0.00253165	0.00195579	0.056	4756	tags=63%, list=25%, signal=84%
GO:0030433_UBIQUITIN-DEPENDENT_ERAD_PATHWAY	GO:0030433_UBIQUITIN-DEPENDENT_ERAD_PATHWAY		23	-0.698171	-1.9299	0	0.00224105	0.067	1759	tags=48%, list=9%, signal=53%
GO:0002181_CYTOPLASMIC_TRANSLATION	GO:0002181_CYTOPLASMIC_TRANSLATION		23	-0.692055	-1.92608	0.00502513	0.00247838	0.074	4984	tags=74%, list=26%, signal=100%
GO:0007281_GERM_CELL_DEVELOPMENT	GO:0007281_GERM_CELL_DEVELOPMENT		40	-0.601822	-1.92162	0	0.00261022	0.08	1319	tags=45%, list=7%, signal=48%
GO:0000724_DOUBLE-STRAND_BREAK_REPAIR_VIA_HOMOLOGOUS_RECOMBINATION	GO:0000724_DOUBLE-STRAND_BREAK_REPAIR_VIA_HOMOLOGOUS_RECOMBINATION		17	-0.738694	-1.91818	0	0.00262045	0.083	3318	tags=71%, list=17%, signal=85%
GO:0045899_POSITIVE_REGULATION_OF_RNA_POLYMERASE_II_TRANSCRIPTIONAL_PREINITIATION_COMPLEX_ASSEMBLY	GO:0045899_POSITIVE_REGULATION_OF_RNA_POLYMERASE_II_TRANSCRIPTIONAL_PREINITIATION_COMPLEX_ASSEMBLY		8	-0.88644	-1.90864	0	0.00302243	0.098	1759	tags=88%, list=9%, signal=96%
GO:1901800_POSITIVE_REGULATION_OF_PROTEASOMAL_PROTEIN_CATABOLIC_PROCESS	GO:1901800_POSITIVE_REGULATION_OF_PROTEASOMAL_PROTEIN_CATABOLIC_PROCESS		8	-0.88644	-1.89794	0	0.00374903	0.124	1759	tags=88%, list=9%, signal=96%
GO:0000132_ESTABLISHMENT_OF_MITOTIC_SPINDLE_ORIENTATION	GO:0000132_ESTABLISHMENT_OF_MITOTIC_SPINDLE_ORIENTATION		41	-0.58941	-1.89419	0.00566572	0.00393871	0.133	2535	tags=37%, list=13%, signal=42%
GO:0000212_MEIOTIC_SPINDLE_ORGANIZATION	GO:0000212_MEIOTIC_SPINDLE_ORGANIZATION		11	-0.803455	-1.89079	0	0.00406457	0.141	2737	tags=73%, list=14%, signal=85%
GO:0006289_NUCLEOTIDE-EXCISION_REPAIR	GO:0006289_NUCLEOTIDE-EXCISION_REPAIR		19	-0.704525	-1.88831	0.00245098	0.00413369	0.147	4044	tags=63%, list=21%, signal=80%
GO:0040038_POLAR_BODY_EXTRUSION_AFTER_MEIOTIC_DIVISIONS	GO:0040038_POLAR_BODY_EXTRUSION_AFTER_MEIOTIC_DIVISIONS		16	-0.725438	-1.88325	0	0.00422924	0.153	3082	tags=63%, list=16%, signal=75%
GO:0016573_HISTONE_ACETYLATION	GO:0016573_HISTONE_ACETYLATION		27	-0.651376	-1.8719	0	0.00484528	0.178	2808	tags=44%, list=15%, signal=52%
GO:0007131_RECIPROCAL_MEIOTIC_RECOMBINATION	GO:0007131_RECIPROCAL_MEIOTIC_RECOMBINATION		9	-0.857785	-1.86594	0	0.00517658	0.191	1613	tags=67%, list=8%, signal=73%
GO:0006607_NLS-BEARING_PROTEIN_IMPORT_INTO_NUCLEUS	GO:0006607_NLS-BEARING_PROTEIN_IMPORT_INTO_NUCLEUS		9	-0.849068	-1.85509	0	0.0060589	0.223	2518	tags=78%, list=13%, signal=90%
GO:0008360_REGULATION_OF_CELL_SHAPE	GO:0008360_REGULATION_OF_CELL_SHAPE		82	-0.502514	-1.84956	0	0.00651085	0.245	3208	tags=32%, list=17%, signal=38%
GO:0006284_BASE-EXCISION_REPAIR	GO:0006284_BASE-EXCISION_REPAIR		8	-0.871626	-1.84676	0	0.00667363	0.257	2070	tags=88%, list=11%, signal=98%
GO:0032508_DNA_DUPLEX_UNWINDING	GO:0032508_DNA_DUPLEX_UNWINDING		35	-0.594228	-1.84624	0.00263852	0.00667622	0.262	2898	tags=46%, list=15%, signal=54%
GO:0006405_RNA_EXPORT_FROM_NUCLEUS	GO:0006405_RNA_EXPORT_FROM_NUCLEUS		8	-0.864134	-1.83546	0	0.00747097	0.292	2588	tags=100%, list=14%, signal=116%
GO:0071897_DNA_BIOSYNTHETIC_PROCESS	GO:0071897_DNA_BIOSYNTHETIC_PROCESS		12	-0.772445	-1.8329	0.00222222	0.00768275	0.303	655	tags=33%, list=3%, signal=35%
GO:0001522_PSEUDOURIDINE_SYNTHESIS	GO:0001522_PSEUDOURIDINE_SYNTHESIS		12	-0.77858	-1.83202	0	0.00762396	0.306	4126	tags=92%, list=22%, signal=117%
GO:0035435_PHOSPHATE_ION_TRANSMEMBRANE_TRANSPORT	GO:0035435_PHOSPHATE_ION_TRANSMEMBRANE_TRANSPORT		10	-0.826483	-1.82614	0.00227273	0.0083353	0.341	984	tags=40%, list=5%, signal=42%
GO:0009794_REGULATION_OF_MITOTIC_CELL_CYCLE,_EMBRYONIC	GO:0009794_REGULATION_OF_MITOTIC_CELL_CYCLE,_EMBRYONIC		12	-0.759595	-1.82373	0	0.00840103	0.351	2670	tags=58%, list=14%, signal=68%
GO:0000027_RIBOSOMAL_LARGE_SUBUNIT_ASSEMBLY	GO:0000027_RIBOSOMAL_LARGE_SUBUNIT_ASSEMBLY		24	-0.646913	-1.82164	0.00722892	0.00851425	0.363	2324	tags=54%, list=12%, signal=62%
GO:0006298_MISMATCH_REPAIR	GO:0006298_MISMATCH_REPAIR		10	-0.800161	-1.81527	0	0.00935607	0.397	3443	tags=80%, list=18%, signal=98%
GO:0016579_PROTEIN_DEUBIQUITINATION	GO:0016579_PROTEIN_DEUBIQUITINATION		31	-0.605556	-1.81481	0.00791557	0.00919814	0.398	2899	tags=48%, list=15%, signal=57%
GO:0006270_DNA_REPLICATION_INITIATION	GO:0006270_DNA_REPLICATION_INITIATION		13	-0.740713	-1.80949	0.00473934	0.00981665	0.425	919	tags=31%, list=5%, signal=32%
GO:0034501_PROTEIN_LOCALIZATION_TO_KINETOCHORE	GO:0034501_PROTEIN_LOCALIZATION_TO_KINETOCHORE		10	-0.815227	-1.79935	0.00458716	0.0114413	0.478	2669	tags=80%, list=14%, signal=93%
GO:0030150_PROTEIN_IMPORT_INTO_MITOCHONDRIAL_MATRIX	GO:0030150_PROTEIN_IMPORT_INTO_MITOCHONDRIAL_MATRIX		10	-0.803888	-1.79109	0.00218818	0.0127085	0.521	890	tags=30%, list=5%, signal=31%
GO:0006413_TRANSLATIONAL_INITIATION	GO:0006413_TRANSLATIONAL_INITIATION		38	-0.57655	-1.78826	0	0.013024	0.538	2636	tags=55%, list=14%, signal=64%
GO:0045132_MEIOTIC_CHROMOSOME_SEGREGATION	GO:0045132_MEIOTIC_CHROMOSOME_SEGREGATION		18	-0.682172	-1.7877	0.00254453	0.0128656	0.539	3385	tags=39%, list=18%, signal=47%
GO:0051307_MEIOTIC_CHROMOSOME_SEPARATION	GO:0051307_MEIOTIC_CHROMOSOME_SEPARATION		12	-0.752984	-1.7844	0.00247525	0.0131219	0.549	2564	tags=67%, list=14%, signal=77%
GO:0006360_TRANSCRIPTION_FROM_RNA_POLYMERASE_I_PROMOTER	GO:0006360_TRANSCRIPTION_FROM_RNA_POLYMERASE_I_PROMOTER		12	-0.744104	-1.77766	0.00691244	0.0142657	0.601	2701	tags=58%, list=14%, signal=68%
GO:0000184_NUCLEAR-TRANSCRIBED_MRNA_CATABOLIC_PROCESS,_NONSENSE-MEDIATED_DECAY	GO:0000184_NUCLEAR-TRANSCRIBED_MRNA_CATABOLIC_PROCESS,_NONSENSE-MEDIATED_DECAY		12	-0.754542	-1.76795	0.00702576	0.0160691	0.643	3081	tags=58%, list=16%, signal=70%
GO:0008380_RNA_SPLICING	GO:0008380_RNA_SPLICING		47	-0.542557	-1.76697	0	0.0160165	0.648	4056	tags=55%, list=21%, signal=70%
GO:0006261_DNA-DEPENDENT_DNA_REPLICATION	GO:0006261_DNA-DEPENDENT_DNA_REPLICATION		8	-0.838633	-1.76195	0	0.0168817	0.674	1598	tags=63%, list=8%, signal=68%
GO:0043039_TRNA_AMINOACYLATION	GO:0043039_TRNA_AMINOACYLATION		8	-0.841587	-1.75654	0	0.0181582	0.707	3016	tags=100%, list=16%, signal=119%
GO:0030422_PRODUCTION_OF_SIRNA_INVOLVED_IN_RNA_INTERFERENCE	GO:0030422_PRODUCTION_OF_SIRNA_INVOLVED_IN_RNA_INTERFERENCE		9	-0.798374	-1.75498	0	0.0182354	0.713	3552	tags=78%, list=19%, signal=96%
GO:0000245_SPLICEOSOMAL_COMPLEX_ASSEMBLY	GO:0000245_SPLICEOSOMAL_COMPLEX_ASSEMBLY		11	-0.740928	-1.75343	0.00746269	0.018356	0.717	2977	tags=64%, list=16%, signal=75%
GO:0006401_RNA_CATABOLIC_PROCESS	GO:0006401_RNA_CATABOLIC_PROCESS		12	-0.733628	-1.75076	0.00228311	0.0186841	0.726	2687	tags=67%, list=14%, signal=78%
GO:0000712_RESOLUTION_OF_MEIOTIC_RECOMBINATION_INTERMEDIATES	GO:0000712_RESOLUTION_OF_MEIOTIC_RECOMBINATION_INTERMEDIATES		14	-0.711573	-1.7505	0.0071599	0.0184515	0.727	2861	tags=50%, list=15%, signal=59%
GO:0006458_'DE_NOVO'_PROTEIN_FOLDING	GO:0006458_'DE_NOVO'_PROTEIN_FOLDING		9	-0.773717	-1.74774	0.0046083	0.0189134	0.742	3413	tags=89%, list=18%, signal=108%
GO:0031647_REGULATION_OF_PROTEIN_STABILITY	GO:0031647_REGULATION_OF_PROTEIN_STABILITY		9	-0.82292	-1.744	0.00215983	0.0196506	0.76	1786	tags=56%, list=9%, signal=61%
GO:0007130_SYNAPTONEMAL_COMPLEX_ASSEMBLY	GO:0007130_SYNAPTONEMAL_COMPLEX_ASSEMBLY		6	-0.901794	-1.73907	0.00210084	0.0211299	0.794	390	tags=50%, list=2%, signal=51%
GO:1905342_POSITIVE_REGULATION_OF_PROTEIN_LOCALIZATION_TO_KINETOCHORE	GO:1905342_POSITIVE_REGULATION_OF_PROTEIN_LOCALIZATION_TO_KINETOCHORE		7	-0.846239	-1.7387	0.00426439	0.0209296	0.795	2669	tags=86%, list=14%, signal=100%
GO:0006310_DNA_RECOMBINATION	GO:0006310_DNA_RECOMBINATION		23	-0.617054	-1.73027	0.00242718	0.0230174	0.826	3559	tags=48%, list=19%, signal=59%
GO:1903394_PROTEIN_LOCALIZATION_TO_KINETOCHORE_INVOLVED_IN_KINETOCHORE_ASSEMBLY	GO:1903394_PROTEIN_LOCALIZATION_TO_KINETOCHORE_INVOLVED_IN_KINETOCHORE_ASSEMBLY		5	-0.902581	-1.72669	0.00220264	0.0236615	0.841	1522	tags=80%, list=8%, signal=87%
GENES_LINKED_TO_TRANSLATION	GENES_LINKED_TO_TRANSLATION	Details ...	36	-0.55673	-1.72468	0.00524934	0.0128797	0.023	2636	tags=53%, list=14%, signal=61%
GO:0042006_MASCULINIZATION_OF_HERMAPHRODITIC_GERM-LINE	GO:0042006_MASCULINIZATION_OF_HERMAPHRODITIC_GERM-LINE		7	-0.846178	-1.7202	0.00437637	0.0253797	0.86	1319	tags=57%, list=7%, signal=61%
GO:0000463_MATURATION_OF_LSU-RRNA_FROM_TRICISTRONIC_RRNA_TRANSCRIPT_(SSU-RRNA,_5.8S_RRNA,_LSU-RRNA)	GO:0000463_MATURATION_OF_LSU-RRNA_FROM_TRICISTRONIC_RRNA_TRANSCRIPT_(SSU-RRNA,_5.8S_RRNA,_LSU-RRNA)		6	-0.891142	-1.71665	0.00214592	0.0262719	0.869	1202	tags=83%, list=6%, signal=89%
GO:0002098_TRNA_WOBBLE_URIDINE_MODIFICATION	GO:0002098_TRNA_WOBBLE_URIDINE_MODIFICATION		7	-0.838154	-1.71001	0.00854701	0.0283524	0.891	1896	tags=71%, list=10%, signal=79%
GO:0000727_DOUBLE-STRAND_BREAK_REPAIR_VIA_BREAK-INDUCED_REPLICATION	GO:0000727_DOUBLE-STRAND_BREAK_REPAIR_VIA_BREAK-INDUCED_REPLICATION		5	-0.908012	-1.70682	0.00197239	0.0290996	0.899	912	tags=60%, list=5%, signal=63%
GO:0000398_MRNA_SPLICING,_VIA_SPLICEOSOME	GO:0000398_MRNA_SPLICING,_VIA_SPLICEOSOME		68	-0.476243	-1.69293	0.00581395	0.0343682	0.936	4816	tags=43%, list=25%, signal=57%
GO:0043248_PROTEASOME_ASSEMBLY	GO:0043248_PROTEASOME_ASSEMBLY		10	-0.751676	-1.69108	0.00881057	0.034636	0.939	3307	tags=50%, list=17%, signal=61%
GO:0006511_UBIQUITIN-DEPENDENT_PROTEIN_CATABOLIC_PROCESS	GO:0006511_UBIQUITIN-DEPENDENT_PROTEIN_CATABOLIC_PROCESS		89	-0.457237	-1.67462	0	0.0418943	0.97	3616	tags=43%, list=19%, signal=52%
GO:0030490_MATURATION_OF_SSU-RRNA	GO:0030490_MATURATION_OF_SSU-RRNA		10	-0.741097	-1.67326	0.0135135	0.0421087	0.971	2845	tags=60%, list=15%, signal=71%
GO:0006999_NUCLEAR_PORE_ORGANIZATION	GO:0006999_NUCLEAR_PORE_ORGANIZATION		5	-0.898257	-1.67158	0	0.0424841	0.972	1805	tags=80%, list=10%, signal=88%
GO:0060471_CORTICAL_GRANULE_EXOCYTOSIS	GO:0060471_CORTICAL_GRANULE_EXOCYTOSIS		6	-0.843292	-1.66938	0.00902935	0.0429806	0.976	2016	tags=67%, list=11%, signal=75%
GO:0007079_MITOTIC_CHROMOSOME_MOVEMENT_TOWARDS_SPINDLE_POLE	GO:0007079_MITOTIC_CHROMOSOME_MOVEMENT_TOWARDS_SPINDLE_POLE		6	-0.858406	-1.66893	0.00402414	0.0426784	0.976	2669	tags=83%, list=14%, signal=97%
GO:0008595_ANTERIOR/POSTERIOR_AXIS_SPECIFICATION,_EMBRYO	GO:0008595_ANTERIOR/POSTERIOR_AXIS_SPECIFICATION,_EMBRYO		15	-0.665053	-1.65993	0.011655	0.0466178	0.984	3432	tags=53%, list=18%, signal=65%
GO:0006400_TRNA_MODIFICATION	GO:0006400_TRNA_MODIFICATION		12	-0.693699	-1.65185	0.0283688	0.0505106	0.99	3280	tags=75%, list=17%, signal=91%
GO:0051257_MEIOTIC_SPINDLE_MIDZONE_ASSEMBLY	GO:0051257_MEIOTIC_SPINDLE_MIDZONE_ASSEMBLY		7	-0.784913	-1.64885	0.0107759	0.0518879	0.994	4091	tags=100%, list=22%, signal=127%
GO:0007052_MITOTIC_SPINDLE_ORGANIZATION	GO:0007052_MITOTIC_SPINDLE_ORGANIZATION		10	-0.712743	-1.64849	0.0245098	0.0515333	0.994	3882	tags=60%, list=20%, signal=75%
GO:0008284_POSITIVE_REGULATION_OF_CELL_PROLIFERATION	GO:0008284_POSITIVE_REGULATION_OF_CELL_PROLIFERATION		11	-0.70532	-1.64821	0.0266667	0.0511221	0.994	2912	tags=36%, list=15%, signal=43%
GO:0030997_REGULATION_OF_CENTRIOLE-CENTRIOLE_COHESION	GO:0030997_REGULATION_OF_CENTRIOLE-CENTRIOLE_COHESION		5	-0.885278	-1.64593	0.00877193	0.0519411	0.994	2184	tags=100%, list=12%, signal=113%
GO:0007004_TELOMERE_MAINTENANCE_VIA_TELOMERASE	GO:0007004_TELOMERE_MAINTENANCE_VIA_TELOMERASE		6	-0.83326	-1.64441	0.00712589	0.0523169	0.994	1790	tags=50%, list=9%, signal=55%
GO:0009451_RNA_MODIFICATION	GO:0009451_RNA_MODIFICATION		19	-0.615597	-1.642	0.0145278	0.0532241	0.995	4126	tags=68%, list=22%, signal=87%
GO:0071902_POSITIVE_REGULATION_OF_PROTEIN_SERINE/THREONINE_KINASE_ACTIVITY	GO:0071902_POSITIVE_REGULATION_OF_PROTEIN_SERINE/THREONINE_KINASE_ACTIVITY		6	-0.816659	-1.63642	0.011655	0.0556569	0.997	2745	tags=67%, list=14%, signal=78%
GO:0000278_MITOTIC_CELL_CYCLE	GO:0000278_MITOTIC_CELL_CYCLE		18	-0.611001	-1.63598	0.0168269	0.0553364	0.997	3626	tags=44%, list=19%, signal=55%
GO:0016575_HISTONE_DEACETYLATION	GO:0016575_HISTONE_DEACETYLATION		10	-0.729123	-1.63233	0.0233645	0.056869	0.998	582	tags=30%, list=3%, signal=31%
GO:0051256_MITOTIC_SPINDLE_MIDZONE_ASSEMBLY	GO:0051256_MITOTIC_SPINDLE_MIDZONE_ASSEMBLY		6	-0.824609	-1.63141	0.00813008	0.0568154	0.998	3082	tags=83%, list=16%, signal=99%
GO:1903863_P_GRANULE_ASSEMBLY	GO:1903863_P_GRANULE_ASSEMBLY		7	-0.800448	-1.63117	0.0104603	0.0563837	0.998	2986	tags=71%, list=16%, signal=85%
GO:0006402_MRNA_CATABOLIC_PROCESS	GO:0006402_MRNA_CATABOLIC_PROCESS		6	-0.835137	-1.62831	0.0169133	0.0575976	0.999	2600	tags=83%, list=14%, signal=97%
GO:0090503_RNA_PHOSPHODIESTER_BOND_HYDROLYSIS,_EXONUCLEOLYTIC	GO:0090503_RNA_PHOSPHODIESTER_BOND_HYDROLYSIS,_EXONUCLEOLYTIC		9	-0.746244	-1.62694	0.020362	0.0578124	0.999	2097	tags=56%, list=11%, signal=62%
GO:0006259_DNA_METABOLIC_PROCESS	GO:0006259_DNA_METABOLIC_PROCESS		17	-0.626361	-1.62301	0.0216346	0.0595181	1	4385	tags=41%, list=23%, signal=53%
GO:0006303_DOUBLE-STRAND_BREAK_REPAIR_VIA_NONHOMOLOGOUS_END_JOINING	GO:0006303_DOUBLE-STRAND_BREAK_REPAIR_VIA_NONHOMOLOGOUS_END_JOINING		8	-0.767104	-1.62164	0.0153509	0.0597813	1	2501	tags=63%, list=13%, signal=72%
GO:0016075_RRNA_CATABOLIC_PROCESS	GO:0016075_RRNA_CATABOLIC_PROCESS		5	-0.867954	-1.61629	0.00856531	0.0627539	1	2120	tags=80%, list=11%, signal=90%
GO:0033962_CYTOPLASMIC_MRNA_PROCESSING_BODY_ASSEMBLY	GO:0033962_CYTOPLASMIC_MRNA_PROCESSING_BODY_ASSEMBLY		5	-0.86443	-1.61576	0.0104822	0.0625034	1	846	tags=40%, list=4%, signal=42%
GO:0006727_OMMOCHROME_BIOSYNTHETIC_PROCESS	GO:0006727_OMMOCHROME_BIOSYNTHETIC_PROCESS		7	-0.791417	-1.61404	0.00423729	0.0629881	1	627	tags=43%, list=3%, signal=44%
GO:0030488_TRNA_METHYLATION	GO:0030488_TRNA_METHYLATION		13	-0.678889	-1.60716	0.022779	0.0668744	1	4241	tags=62%, list=22%, signal=79%
GO:0090501_RNA_PHOSPHODIESTER_BOND_HYDROLYSIS	GO:0090501_RNA_PHOSPHODIESTER_BOND_HYDROLYSIS		10	-0.714689	-1.60539	0.0288248	0.06757	1	1698	tags=40%, list=9%, signal=44%
GO:0042078_GERM-LINE_STEM_CELL_DIVISION	GO:0042078_GERM-LINE_STEM_CELL_DIVISION		8	-0.752858	-1.60285	0.0223714	0.0686733	1	1932	tags=50%, list=10%, signal=56%
GO:0006383_TRANSCRIPTION_FROM_RNA_POLYMERASE_III_PROMOTER	GO:0006383_TRANSCRIPTION_FROM_RNA_POLYMERASE_III_PROMOTER		17	-0.619264	-1.59615	0.0195122	0.0727773	1	2701	tags=47%, list=14%, signal=55%
GO:0031054_PRE-MIRNA_PROCESSING	GO:0031054_PRE-MIRNA_PROCESSING		6	-0.812083	-1.59571	0.0113636	0.0724503	1	2891	tags=83%, list=15%, signal=98%
GO:0000338_PROTEIN_DENEDDYLATION	GO:0000338_PROTEIN_DENEDDYLATION		6	-0.80435	-1.59494	0.0228216	0.0722033	1	1357	tags=67%, list=7%, signal=72%
GO:1903436_REGULATION_OF_MITOTIC_CYTOKINETIC_PROCESS	GO:1903436_REGULATION_OF_MITOTIC_CYTOKINETIC_PROCESS		6	-0.811423	-1.59247	0.0173536	0.0734885	1	2670	tags=83%, list=14%, signal=97%
GO:0045977_POSITIVE_REGULATION_OF_MITOTIC_CELL_CYCLE,_EMBRYONIC	GO:0045977_POSITIVE_REGULATION_OF_MITOTIC_CELL_CYCLE,_EMBRYONIC		5	-0.843761	-1.58954	0.0169851	0.0747775	1	1700	tags=60%, list=9%, signal=66%
GO:0051729_GERMLINE_CELL_CYCLE_SWITCHING,_MITOTIC_TO_MEIOTIC_CELL_CYCLE	GO:0051729_GERMLINE_CELL_CYCLE_SWITCHING,_MITOTIC_TO_MEIOTIC_CELL_CYCLE		5	-0.840131	-1.58846	0.0191898	0.0750757	1	2912	tags=80%, list=15%, signal=94%
GO:0006817_PHOSPHATE_ION_TRANSPORT	GO:0006817_PHOSPHATE_ION_TRANSPORT		5	-0.850709	-1.57754	0.0328228	0.0826026	1	984	tags=60%, list=5%, signal=63%
GO:0000028_RIBOSOMAL_SMALL_SUBUNIT_ASSEMBLY	GO:0000028_RIBOSOMAL_SMALL_SUBUNIT_ASSEMBLY		13	-0.651149	-1.57163	0.0415704	0.0866906	1	2799	tags=46%, list=15%, signal=54%
GO:0043161_PROTEASOME-MEDIATED_UBIQUITIN-DEPENDENT_PROTEIN_CATABOLIC_PROCESS	GO:0043161_PROTEASOME-MEDIATED_UBIQUITIN-DEPENDENT_PROTEIN_CATABOLIC_PROCESS		52	-0.470427	-1.56991	0.00847458	0.087359	1	3514	tags=38%, list=19%, signal=47%
GO:0001172_TRANSCRIPTION,_RNA-TEMPLATED	GO:0001172_TRANSCRIPTION,_RNA-TEMPLATED		5	-0.827579	-1.56752	0.0373281	0.0886683	1	2211	tags=80%, list=12%, signal=91%
GO:0090307_MITOTIC_SPINDLE_ASSEMBLY	GO:0090307_MITOTIC_SPINDLE_ASSEMBLY		7	-0.758104	-1.56551	0.0286344	0.0895251	1	2167	tags=57%, list=11%, signal=64%
GO:0010824_REGULATION_OF_CENTROSOME_DUPLICATION	GO:0010824_REGULATION_OF_CENTROSOME_DUPLICATION		6	-0.806072	-1.56314	0.0200445	0.0907842	1	2271	tags=67%, list=12%, signal=76%
GO:0051276_CHROMOSOME_ORGANIZATION	GO:0051276_CHROMOSOME_ORGANIZATION		9	-0.703948	-1.55965	0.0255814	0.0930372	1	2685	tags=67%, list=14%, signal=78%
GO:0051642_CENTROSOME_LOCALIZATION	GO:0051642_CENTROSOME_LOCALIZATION		5	-0.852461	-1.55757	0.0178174	0.0937993	1	2420	tags=60%, list=13%, signal=69%
GO:0040022_FEMINIZATION_OF_HERMAPHRODITIC_GERM-LINE	GO:0040022_FEMINIZATION_OF_HERMAPHRODITIC_GERM-LINE		6	-0.800643	-1.55234	0.0304348	0.0974151	1	1262	tags=50%, list=7%, signal=54%
GO:0006998_NUCLEAR_ENVELOPE_ORGANIZATION	GO:0006998_NUCLEAR_ENVELOPE_ORGANIZATION		5	-0.838329	-1.5523	0.0295455	0.0966688	1	1335	tags=40%, list=7%, signal=43%
GO:0007129_SYNAPSIS	GO:0007129_SYNAPSIS		6	-0.804366	-1.54935	0.020362	0.0986171	1	3179	tags=83%, list=17%, signal=100%
GO:0007099_CENTRIOLE_REPLICATION	GO:0007099_CENTRIOLE_REPLICATION		5	-0.835012	-1.54899	0.0207469	0.0982236	1	3003	tags=80%, list=16%, signal=95%
GO:0001510_RNA_METHYLATION	GO:0001510_RNA_METHYLATION		6	-0.770291	-1.54748	0.0359551	0.098768	1	4241	tags=83%, list=22%, signal=107%
GO:0009792_EMBRYO_DEVELOPMENT_ENDING_IN_BIRTH_OR_EGG_HATCHING	GO:0009792_EMBRYO_DEVELOPMENT_ENDING_IN_BIRTH_OR_EGG_HATCHING		276	-0.358493	-1.54703	0	0.0984788	1	2737	tags=32%, list=14%, signal=37%
GO:0051726_REGULATION_OF_CELL_CYCLE	GO:0051726_REGULATION_OF_CELL_CYCLE		24	-0.549766	-1.54604	0.0335731	0.0985939	1	4236	tags=46%, list=22%, signal=59%
GO:0031124_MRNA_3'-END_PROCESSING	GO:0031124_MRNA_3'-END_PROCESSING		5	-0.833658	-1.53977	0.033543	0.10342	1	3164	tags=100%, list=17%, signal=120%
GO:0000055_RIBOSOMAL_LARGE_SUBUNIT_EXPORT_FROM_NUCLEUS	GO:0000055_RIBOSOMAL_LARGE_SUBUNIT_EXPORT_FROM_NUCLEUS		6	-0.790843	-1.53883	0.0281385	0.10355	1	2290	tags=67%, list=12%, signal=76%
GO:0000288_NUCLEAR-TRANSCRIBED_MRNA_CATABOLIC_PROCESS,_DEADENYLATION-DEPENDENT_DECAY	GO:0000288_NUCLEAR-TRANSCRIBED_MRNA_CATABOLIC_PROCESS,_DEADENYLATION-DEPENDENT_DECAY		8	-0.724843	-1.53542	0.0403587	0.106054	1	2600	tags=63%, list=14%, signal=72%
GO:0031167_RRNA_METHYLATION	GO:0031167_RRNA_METHYLATION		6	-0.77315	-1.53142	0.0375783	0.10867	1	3067	tags=83%, list=16%, signal=99%
GO:1905516_POSITIVE_REGULATION_OF_FERTILIZATION	GO:1905516_POSITIVE_REGULATION_OF_FERTILIZATION		8	-0.720142	-1.52929	0.0448718	0.109656	1	4099	tags=75%, list=22%, signal=96%
GO:0030154_CELL_DIFFERENTIATION	GO:0030154_CELL_DIFFERENTIATION		180	-0.378027	-1.52349	0	0.113159	1	2895	tags=31%, list=15%, signal=36%
GO:1904747_POSITIVE_REGULATION_OF_APOPTOTIC_PROCESS_INVOLVED_IN_DEVELOPMENT	GO:1904747_POSITIVE_REGULATION_OF_APOPTOTIC_PROCESS_INVOLVED_IN_DEVELOPMENT		8	-0.717667	-1.52318	0.0413043	0.112564	1	4100	tags=75%, list=22%, signal=96%
GO:0007338_SINGLE_FERTILIZATION	GO:0007338_SINGLE_FERTILIZATION		9	-0.695107	-1.5218	0.0462555	0.113073	1	2416	tags=44%, list=13%, signal=51%
GO:0036297_INTERSTRAND_CROSS-LINK_REPAIR	GO:0036297_INTERSTRAND_CROSS-LINK_REPAIR		6	-0.776691	-1.51459	0.044289	0.117654	1	2861	tags=67%, list=15%, signal=78%
GO:0061158_3'-UTR-MEDIATED_MRNA_DESTABILIZATION	GO:0061158_3'-UTR-MEDIATED_MRNA_DESTABILIZATION		17	-0.577623	-1.51351	0.0418719	0.117983	1	1421	tags=29%, list=7%, signal=32%
GO:0051177_MEIOTIC_SISTER_CHROMATID_COHESION	GO:0051177_MEIOTIC_SISTER_CHROMATID_COHESION		6	-0.783952	-1.51042	0.0380313	0.120265	1	3056	tags=83%, list=16%, signal=99%
GO:0006352_DNA-TEMPLATED_TRANSCRIPTION,_INITIATION	GO:0006352_DNA-TEMPLATED_TRANSCRIPTION,_INITIATION		11	-0.655331	-1.50791	0.0437788	0.12113	1	2067	tags=36%, list=11%, signal=41%
GO:0034198_CELLULAR_RESPONSE_TO_AMINO_ACID_STARVATION	GO:0034198_CELLULAR_RESPONSE_TO_AMINO_ACID_STARVATION		5	-0.790354	-1.50301	0.0421941	0.124404	1	2886	tags=60%, list=15%, signal=71%
GO:0007098_CENTROSOME_CYCLE	GO:0007098_CENTROSOME_CYCLE		7	-0.755045	-1.50095	0.034188	0.12559	1	2998	tags=71%, list=16%, signal=85%
GO:0006406_MRNA_EXPORT_FROM_NUCLEUS	GO:0006406_MRNA_EXPORT_FROM_NUCLEUS		12	-0.636854	-1.49234	0.0454545	0.131529	1	3935	tags=50%, list=21%, signal=63%
GO:0042274_RIBOSOMAL_SMALL_SUBUNIT_BIOGENESIS	GO:0042274_RIBOSOMAL_SMALL_SUBUNIT_BIOGENESIS		7	-0.741594	-1.48724	0.0489362	0.135999	1	2428	tags=43%, list=13%, signal=49%
GO:0006997_NUCLEUS_ORGANIZATION	GO:0006997_NUCLEUS_ORGANIZATION		18	-0.556371	-1.47627	0.0401891	0.143359	1	2533	tags=67%, list=13%, signal=77%
GO:0051603_PROTEOLYSIS_INVOLVED_IN_CELLULAR_PROTEIN_CATABOLIC_PROCESS	GO:0051603_PROTEOLYSIS_INVOLVED_IN_CELLULAR_PROTEIN_CATABOLIC_PROCESS		45	-0.460884	-1.47198	0.027933	0.14708	1	5701	tags=60%, list=30%, signal=86%
GO:0048599_OOCYTE_DEVELOPMENT	GO:0048599_OOCYTE_DEVELOPMENT		14	-0.580302	-1.47139	0.0498812	0.146853	1	1514	tags=29%, list=8%, signal=31%
GO:0032259_METHYLATION	GO:0032259_METHYLATION		95	-0.400803	-1.47029	0.0162866	0.147062	1	3196	tags=39%, list=17%, signal=47%
GO:0000723_TELOMERE_MAINTENANCE	GO:0000723_TELOMERE_MAINTENANCE		15	-0.590795	-1.46599	0.0497512	0.150802	1	2411	tags=40%, list=13%, signal=46%
GO:0018105_PEPTIDYL-SERINE_PHOSPHORYLATION	GO:0018105_PEPTIDYL-SERINE_PHOSPHORYLATION		127	-0.369504	-1.42596	0.00704225	0.185927	1	3833	tags=31%, list=20%, signal=39%
GO:0016567_PROTEIN_UBIQUITINATION	GO:0016567_PROTEIN_UBIQUITINATION		123	-0.370444	-1.42372	0.0150943	0.1865	1	2003	tags=24%, list=11%, signal=27%
GO:0010468_REGULATION_OF_GENE_EXPRESSION	GO:0010468_REGULATION_OF_GENE_EXPRESSION		61	-0.405134	-1.37406	0.0403458	0.225941	1	3387	tags=34%, list=18%, signal=42%

## Sheet: WW_D1_O2_pos
NAME	GS<br> follow link to MSigDB	GS DETAILS	SIZE	ES	NES	NOM p-val	FDR q-val	FWER p-val	RANK AT MAX	LEADING EDGE
GO:0040017_POSITIVE_REGULATION_OF_LOCOMOTION	GO:0040017_POSITIVE_REGULATION_OF_LOCOMOTION	Details ...	47	0.750515	2.1804	0	0	0	1883	tags=49%, list=10%, signal=54%
GO:0007155_CELL_ADHESION	GO:0007155_CELL_ADHESION	Details ...	46	0.720776	2.13463	0	0	0	1800	tags=48%, list=9%, signal=53%
GO:0006937_REGULATION_OF_MUSCLE_CONTRACTION	GO:0006937_REGULATION_OF_MUSCLE_CONTRACTION	Details ...	33	0.768418	2.10644	0	0	0	2907	tags=67%, list=15%, signal=79%
GO:0001764_NEURON_MIGRATION	GO:0001764_NEURON_MIGRATION	Details ...	38	0.730928	2.07522	0	0	0	3078	tags=55%, list=16%, signal=66%
GENES_LINKED_TO_CA2+_SIGNALLING	GENES_LINKED_TO_CA2+_SIGNALLING	Details ...	39	0.736636	2.06853	0	0	0	3072	tags=64%, list=16%, signal=76%
GO:0046662_REGULATION_OF_OVIPOSITION	GO:0046662_REGULATION_OF_OVIPOSITION	Details ...	45	0.69584	2.04935	0	0.000219259	0.001	1679	tags=36%, list=9%, signal=39%
GO:0006811_ION_TRANSPORT	GO:0006811_ION_TRANSPORT	Details ...	361	0.529071	2.01843	0	0.000354609	0.002	4000	tags=40%, list=21%, signal=50%
GO:0040011_LOCOMOTION	GO:0040011_LOCOMOTION	Details ...	95	0.605565	1.99713	0	0.000750297	0.005	2812	tags=42%, list=15%, signal=49%
GO:0006936_MUSCLE_CONTRACTION	GO:0006936_MUSCLE_CONTRACTION	Details ...	17	0.819396	1.98226	0	0.000779026	0.006	2425	tags=76%, list=13%, signal=88%
GO:0042395_ECDYSIS,_COLLAGEN_AND_CUTICULIN-BASED_CUTICLE	GO:0042395_ECDYSIS,_COLLAGEN_AND_CUTICULIN-BASED_CUTICLE	Details ...	10	0.924231	1.97293	0	0.000692468	0.006	332	tags=40%, list=2%, signal=41%
GO:0001666_RESPONSE_TO_HYPOXIA	GO:0001666_RESPONSE_TO_HYPOXIA	Details ...	11	0.884543	1.95602	0	0.0012385	0.012	1431	tags=73%, list=8%, signal=79%
GENES_LINKED_TO_OXIDATIVE_STRESS_AND_REDOX_STRESS_REGULATION	GENES_LINKED_TO_OXIDATIVE_STRESS_AND_REDOX_STRESS_REGULATION	Details ...	41	0.67137	1.95587	0	0	0	2651	tags=46%, list=14%, signal=54%
GO:0043051_REGULATION_OF_PHARYNGEAL_PUMPING	GO:0043051_REGULATION_OF_PHARYNGEAL_PUMPING	Details ...	38	0.67327	1.92598	0	0.00224615	0.024	1407	tags=32%, list=7%, signal=34%
GO:0010466_NEGATIVE_REGULATION_OF_PEPTIDASE_ACTIVITY	GO:0010466_NEGATIVE_REGULATION_OF_PEPTIDASE_ACTIVITY	Details ...	17	0.78574	1.89588	0.00168634	0.00507158	0.058	1457	tags=47%, list=8%, signal=51%
GO:0018996_MOLTING_CYCLE,_COLLAGEN_AND_CUTICULIN-BASED_CUTICLE	GO:0018996_MOLTING_CYCLE,_COLLAGEN_AND_CUTICULIN-BASED_CUTICLE	Details ...	56	0.616155	1.89558	0	0.00468146	0.058	4202	tags=55%, list=22%, signal=71%
GO:0033563_DORSAL/VENTRAL_AXON_GUIDANCE	GO:0033563_DORSAL/VENTRAL_AXON_GUIDANCE	Details ...	22	0.735646	1.88794	0	0.00543619	0.073	3078	tags=50%, list=16%, signal=60%
GO:0006821_CHLORIDE_TRANSPORT	GO:0006821_CHLORIDE_TRANSPORT	Details ...	53	0.624559	1.88539	0.00156006	0.00548554	0.077	2806	tags=36%, list=15%, signal=42%
GO:0006820_ANION_TRANSPORT	GO:0006820_ANION_TRANSPORT	Details ...	47	0.641247	1.88214	0	0.00552576	0.083	3050	tags=38%, list=16%, signal=46%
GO:0007218_NEUROPEPTIDE_SIGNALING_PATHWAY	GO:0007218_NEUROPEPTIDE_SIGNALING_PATHWAY	Details ...	94	0.574736	1.87864	0	0.00556005	0.089	5109	tags=52%, list=27%, signal=71%
GO:0010951_NEGATIVE_REGULATION_OF_ENDOPEPTIDASE_ACTIVITY	GO:0010951_NEGATIVE_REGULATION_OF_ENDOPEPTIDASE_ACTIVITY	Details ...	50	0.627237	1.87774	0	0.00530767	0.09	5283	tags=66%, list=28%, signal=91%
GO:0071805_POTASSIUM_ION_TRANSMEMBRANE_TRANSPORT	GO:0071805_POTASSIUM_ION_TRANSMEMBRANE_TRANSPORT	Details ...	84	0.562894	1.84958	0	0.00843103	0.145	1860	tags=32%, list=10%, signal=35%
GO:0097402_NEUROBLAST_MIGRATION	GO:0097402_NEUROBLAST_MIGRATION	Details ...	14	0.788829	1.83549	0	0.0104273	0.189	2941	tags=57%, list=15%, signal=68%
GO:0007411_AXON_GUIDANCE	GO:0007411_AXON_GUIDANCE		31	0.650284	1.80491	0.00164474	0.0159905	0.284	4031	tags=52%, list=21%, signal=65%
GO:0034765_REGULATION_OF_ION_TRANSMEMBRANE_TRANSPORT	GO:0034765_REGULATION_OF_ION_TRANSMEMBRANE_TRANSPORT		25	0.682687	1.80228	0	0.0158213	0.291	3030	tags=52%, list=16%, signal=62%
GO:0010171_BODY_MORPHOGENESIS	GO:0010171_BODY_MORPHOGENESIS		20	0.718166	1.80052	0	0.0157998	0.301	2276	tags=50%, list=12%, signal=57%
GENES_LINKED_TO_OXYGEN_SENSING	GENES_LINKED_TO_OXYGEN_SENSING_CORE_EXTENDED	Details ...	22	0.708221	1.79151	0	0.00130556	0.003	3030	tags=50%, list=16%, signal=59%
GO:0040012_REGULATION_OF_LOCOMOTION	GO:0040012_REGULATION_OF_LOCOMOTION		38	0.631836	1.79095	0.00159744	0.0187691	0.357	2458	tags=39%, list=13%, signal=45%
GO:0008652_CELLULAR_AMINO_ACID_BIOSYNTHETIC_PROCESS	GO:0008652_CELLULAR_AMINO_ACID_BIOSYNTHETIC_PROCESS		17	0.743526	1.78946	0	0.0186274	0.363	2623	tags=59%, list=14%, signal=68%
GO:0060078_REGULATION_OF_POSTSYNAPTIC_MEMBRANE_POTENTIAL	GO:0060078_REGULATION_OF_POSTSYNAPTIC_MEMBRANE_POTENTIAL		22	0.699244	1.78777	0.00661157	0.0186495	0.375	1676	tags=41%, list=9%, signal=45%
GO:0014057_POSITIVE_REGULATION_OF_ACETYLCHOLINE_SECRETION,_NEUROTRANSMISSION	GO:0014057_POSITIVE_REGULATION_OF_ACETYLCHOLINE_SECRETION,_NEUROTRANSMISSION		11	0.835433	1.78572	0	0.0186466	0.387	1045	tags=55%, list=6%, signal=58%
GO:0006970_RESPONSE_TO_OSMOTIC_STRESS	GO:0006970_RESPONSE_TO_OSMOTIC_STRESS		13	0.800076	1.78279	0.00179856	0.018866	0.4	2203	tags=46%, list=12%, signal=52%
GO:0007626_LOCOMOTORY_BEHAVIOR	GO:0007626_LOCOMOTORY_BEHAVIOR		22	0.718777	1.78086	0.00169205	0.0191687	0.411	1320	tags=45%, list=7%, signal=49%
GO:0045454_CELL_REDOX_HOMEOSTASIS	GO:0045454_CELL_REDOX_HOMEOSTASIS		58	0.574644	1.77887	0	0.0191461	0.42	898	tags=21%, list=5%, signal=22%
GO:0060279_POSITIVE_REGULATION_OF_OVULATION	GO:0060279_POSITIVE_REGULATION_OF_OVULATION		8	0.865578	1.77158	0	0.0215995	0.477	1807	tags=88%, list=10%, signal=97%
GO:0043087_REGULATION_OF_GTPASE_ACTIVITY	GO:0043087_REGULATION_OF_GTPASE_ACTIVITY		12	0.790927	1.75428	0	0.0285806	0.601	2201	tags=67%, list=12%, signal=75%
GO:0045664_REGULATION_OF_NEURON_DIFFERENTIATION	GO:0045664_REGULATION_OF_NEURON_DIFFERENTIATION		10	0.832771	1.7524	0.00357143	0.0286651	0.611	2638	tags=80%, list=14%, signal=93%
GO:0030522_INTRACELLULAR_RECEPTOR_SIGNALING_PATHWAY	GO:0030522_INTRACELLULAR_RECEPTOR_SIGNALING_PATHWAY		14	0.755794	1.75225	0.00170068	0.027913	0.612	3074	tags=57%, list=16%, signal=68%
GO:1902476_CHLORIDE_TRANSMEMBRANE_TRANSPORT	GO:1902476_CHLORIDE_TRANSMEMBRANE_TRANSPORT		60	0.567835	1.75138	0	0.0275808	0.619	2806	tags=32%, list=15%, signal=37%
GO:0034220_ION_TRANSMEMBRANE_TRANSPORT	GO:0034220_ION_TRANSMEMBRANE_TRANSPORT		136	0.501213	1.7494	0	0.0274135	0.625	3977	tags=43%, list=21%, signal=54%
GO:0010172_EMBRYONIC_BODY_MORPHOGENESIS	GO:0010172_EMBRYONIC_BODY_MORPHOGENESIS		36	0.613866	1.7473	0.00306279	0.0276703	0.635	2467	tags=44%, list=13%, signal=51%
GO:0007399_NERVOUS_SYSTEM_DEVELOPMENT	GO:0007399_NERVOUS_SYSTEM_DEVELOPMENT		76	0.536662	1.73017	0.00148148	0.0352032	0.735	4094	tags=46%, list=22%, signal=58%
GO:0008078_MESODERMAL_CELL_MIGRATION	GO:0008078_MESODERMAL_CELL_MIGRATION		10	0.812383	1.72768	0.00531915	0.0357933	0.751	3505	tags=90%, list=18%, signal=110%
GO:0031581_HEMIDESMOSOME_ASSEMBLY	GO:0031581_HEMIDESMOSOME_ASSEMBLY		14	0.75667	1.72662	0	0.0354878	0.757	539	tags=36%, list=3%, signal=37%
GO:0007517_MUSCLE_ORGAN_DEVELOPMENT	GO:0007517_MUSCLE_ORGAN_DEVELOPMENT		16	0.715044	1.72255	0.00171233	0.036575	0.781	3665	tags=56%, list=19%, signal=70%
GO:0040018_POSITIVE_REGULATION_OF_MULTICELLULAR_ORGANISM_GROWTH	GO:0040018_POSITIVE_REGULATION_OF_MULTICELLULAR_ORGANISM_GROWTH		42	0.589693	1.71331	0.00470958	0.041424	0.831	1021	tags=24%, list=5%, signal=25%
GO:0061096_NEGATIVE_REGULATION_OF_TURNING_BEHAVIOR_INVOLVED_IN_MATING	GO:0061096_NEGATIVE_REGULATION_OF_TURNING_BEHAVIOR_INVOLVED_IN_MATING		7	0.884248	1.70032	0.00391389	0.0490546	0.883	1980	tags=71%, list=10%, signal=80%
GO:0045214_SARCOMERE_ORGANIZATION	GO:0045214_SARCOMERE_ORGANIZATION		14	0.742367	1.69922	0.00702988	0.0487979	0.886	3177	tags=79%, list=17%, signal=94%
GO:0055085_TRANSMEMBRANE_TRANSPORT	GO:0055085_TRANSMEMBRANE_TRANSPORT		380	0.441573	1.69555	0	0.0507083	0.9	2833	tags=28%, list=15%, signal=32%
GO:0035545_DETERMINATION_OF_LEFT/RIGHT_ASYMMETRY_IN_NERVOUS_SYSTEM	GO:0035545_DETERMINATION_OF_LEFT/RIGHT_ASYMMETRY_IN_NERVOUS_SYSTEM		11	0.77142	1.69417	0.00912409	0.0507176	0.905	3845	tags=73%, list=20%, signal=91%
GO:1902600_HYDROGEN_ION_TRANSMEMBRANE_TRANSPORT	GO:1902600_HYDROGEN_ION_TRANSMEMBRANE_TRANSPORT		31	0.612414	1.69302	0.00328947	0.0506014	0.909	3697	tags=45%, list=19%, signal=56%
GO:0035023_REGULATION_OF_RHO_PROTEIN_SIGNAL_TRANSDUCTION	GO:0035023_REGULATION_OF_RHO_PROTEIN_SIGNAL_TRANSDUCTION		20	0.671942	1.69114	0	0.0511374	0.916	2458	tags=50%, list=13%, signal=57%
GO:0006120_MITOCHONDRIAL_ELECTRON_TRANSPORT,_NADH_TO_UBIQUINONE	GO:0006120_MITOCHONDRIAL_ELECTRON_TRANSPORT,_NADH_TO_UBIQUINONE		17	0.696971	1.69083	0.00652529	0.0503897	0.916	4458	tags=71%, list=23%, signal=92%
GO:0060298_POSITIVE_REGULATION_OF_SARCOMERE_ORGANIZATION	GO:0060298_POSITIVE_REGULATION_OF_SARCOMERE_ORGANIZATION		7	0.849392	1.69081	0.00914077	0.0493819	0.916	2865	tags=100%, list=15%, signal=118%
GO:0040039_INDUCTIVE_CELL_MIGRATION	GO:0040039_INDUCTIVE_CELL_MIGRATION		14	0.735964	1.68712	0.00346021	0.0511395	0.925	2471	tags=50%, list=13%, signal=57%
GO:0032228_REGULATION_OF_SYNAPTIC_TRANSMISSION,_GABAERGIC	GO:0032228_REGULATION_OF_SYNAPTIC_TRANSMISSION,_GABAERGIC		8	0.827878	1.68294	0.00380952	0.0534122	0.934	1946	tags=63%, list=10%, signal=70%
GO:0006094_GLUCONEOGENESIS	GO:0006094_GLUCONEOGENESIS		7	0.871089	1.68171	0.00522648	0.0531138	0.938	2087	tags=71%, list=11%, signal=80%
GO:0007166_CELL_SURFACE_RECEPTOR_SIGNALING_PATHWAY	GO:0007166_CELL_SURFACE_RECEPTOR_SIGNALING_PATHWAY		33	0.614395	1.68139	0.00782473	0.0523569	0.939	2446	tags=45%, list=13%, signal=52%
GO:0060079_EXCITATORY_POSTSYNAPTIC_POTENTIAL	GO:0060079_EXCITATORY_POSTSYNAPTIC_POTENTIAL		35	0.60548	1.67954	0.00950872	0.0528037	0.944	3380	tags=40%, list=18%, signal=49%
GO:0097475_MOTOR_NEURON_MIGRATION	GO:0097475_MOTOR_NEURON_MIGRATION		10	0.789191	1.67868	0.00515464	0.052597	0.945	2836	tags=60%, list=15%, signal=70%
GO:0008344_ADULT_LOCOMOTORY_BEHAVIOR	GO:0008344_ADULT_LOCOMOTORY_BEHAVIOR		8	0.830676	1.67064	0.00527241	0.0577887	0.962	1359	tags=38%, list=7%, signal=40%
GO:1902474_POSITIVE_REGULATION_OF_PROTEIN_LOCALIZATION_TO_SYNAPSE	GO:1902474_POSITIVE_REGULATION_OF_PROTEIN_LOCALIZATION_TO_SYNAPSE		5	0.924697	1.66036	0	0.0655637	0.977	505	tags=60%, list=3%, signal=62%
GO:0016337_SINGLE_ORGANISMAL_CELL-CELL_ADHESION	GO:0016337_SINGLE_ORGANISMAL_CELL-CELL_ADHESION		10	0.783037	1.655	0.0122592	0.0695951	0.983	2361	tags=60%, list=12%, signal=68%
GO:0005975_CARBOHYDRATE_METABOLIC_PROCESS	GO:0005975_CARBOHYDRATE_METABOLIC_PROCESS		102	0.490776	1.6541	0.0027933	0.069286	0.983	3851	tags=35%, list=20%, signal=44%
GO:0006816_CALCIUM_ION_TRANSPORT	GO:0006816_CALCIUM_ION_TRANSPORT		30	0.606085	1.65386	0.00813008	0.0683356	0.983	3072	tags=47%, list=16%, signal=56%
GO:0008045_MOTOR_NEURON_AXON_GUIDANCE	GO:0008045_MOTOR_NEURON_AXON_GUIDANCE		18	0.678543	1.65114	0.00637959	0.0697426	0.985	1962	tags=44%, list=10%, signal=50%
GO:0070588_CALCIUM_ION_TRANSMEMBRANE_TRANSPORT	GO:0070588_CALCIUM_ION_TRANSMEMBRANE_TRANSPORT		38	0.5726	1.64848	0.0015456	0.0709606	0.986	3072	tags=37%, list=16%, signal=44%
GO:0007616_LONG-TERM_MEMORY	GO:0007616_LONG-TERM_MEMORY		5	0.901323	1.64431	0.00957854	0.0733577	0.988	233	tags=40%, list=1%, signal=40%
GO:0030322_STABILIZATION_OF_MEMBRANE_POTENTIAL	GO:0030322_STABILIZATION_OF_MEMBRANE_POTENTIAL		40	0.570785	1.64428	0.00613497	0.072292	0.988	1860	tags=30%, list=10%, signal=33%
GO:0045989_POSITIVE_REGULATION_OF_STRIATED_MUSCLE_CONTRACTION	GO:0045989_POSITIVE_REGULATION_OF_STRIATED_MUSCLE_CONTRACTION		5	0.925217	1.64257	0.00541516	0.0727109	0.988	1359	tags=80%, list=7%, signal=86%
GO:0007271_SYNAPTIC_TRANSMISSION,_CHOLINERGIC	GO:0007271_SYNAPTIC_TRANSMISSION,_CHOLINERGIC		20	0.665917	1.63801	0.00814332	0.0756955	0.991	4717	tags=65%, list=25%, signal=86%
GO:0006813_POTASSIUM_ION_TRANSPORT	GO:0006813_POTASSIUM_ION_TRANSPORT		41	0.56382	1.63785	0.00821018	0.0748091	0.992	3030	tags=46%, list=16%, signal=55%
GO:1903998_REGULATION_OF_EATING_BEHAVIOR	GO:1903998_REGULATION_OF_EATING_BEHAVIOR		9	0.787444	1.63545	0.0162749	0.0756692	0.993	1610	tags=56%, list=8%, signal=61%
GO:0040032_POST-EMBRYONIC_BODY_MORPHOGENESIS	GO:0040032_POST-EMBRYONIC_BODY_MORPHOGENESIS		16	0.68717	1.63155	0.0167785	0.0779139	0.995	2239	tags=56%, list=12%, signal=64%
GO:0050832_DEFENSE_RESPONSE_TO_FUNGUS	GO:0050832_DEFENSE_RESPONSE_TO_FUNGUS		22	0.633624	1.62442	0.00863558	0.0839289	0.998	1573	tags=36%, list=8%, signal=40%
GO:0045987_POSITIVE_REGULATION_OF_SMOOTH_MUSCLE_CONTRACTION	GO:0045987_POSITIVE_REGULATION_OF_SMOOTH_MUSCLE_CONTRACTION		8	0.783454	1.62217	0.0225989	0.0852039	0.998	1301	tags=38%, list=7%, signal=40%
GO:1905485_POSITIVE_REGULATION_OF_MOTOR_NEURON_MIGRATION	GO:1905485_POSITIVE_REGULATION_OF_MOTOR_NEURON_MIGRATION		10	0.771193	1.62196	0.0213144	0.0842905	0.998	2930	tags=60%, list=15%, signal=71%
GO:2000114_REGULATION_OF_ESTABLISHMENT_OF_CELL_POLARITY	GO:2000114_REGULATION_OF_ESTABLISHMENT_OF_CELL_POLARITY		7	0.817367	1.61844	0.0127505	0.0872547	0.998	3441	tags=86%, list=18%, signal=105%
GO:0001508_ACTION_POTENTIAL	GO:0001508_ACTION_POTENTIAL		5	0.895379	1.61793	0.0111732	0.0866537	0.998	1108	tags=60%, list=6%, signal=64%
GO:0009888_TISSUE_DEVELOPMENT	GO:0009888_TISSUE_DEVELOPMENT		16	0.683186	1.61671	0.0189983	0.0867207	0.998	2332	tags=38%, list=12%, signal=43%
GO:2000117_NEGATIVE_REGULATION_OF_CYSTEINE-TYPE_ENDOPEPTIDASE_ACTIVITY	GO:2000117_NEGATIVE_REGULATION_OF_CYSTEINE-TYPE_ENDOPEPTIDASE_ACTIVITY		5	0.895465	1.61346	0.00372439	0.0893509	0.998	1135	tags=60%, list=6%, signal=64%
GO:0060070_CANONICAL_WNT_SIGNALING_PATHWAY	GO:0060070_CANONICAL_WNT_SIGNALING_PATHWAY		10	0.752839	1.60969	0.0181818	0.092238	0.999	3199	tags=70%, list=17%, signal=84%
GO:0007016_CYTOSKELETAL_ANCHORING_AT_PLASMA_MEMBRANE	GO:0007016_CYTOSKELETAL_ANCHORING_AT_PLASMA_MEMBRANE		6	0.857653	1.60846	0.0114068	0.0923612	0.999	1223	tags=50%, list=6%, signal=53%
GO:0009408_RESPONSE_TO_HEAT	GO:0009408_RESPONSE_TO_HEAT		43	0.551531	1.60731	0.00620155	0.0925497	0.999	2203	tags=26%, list=12%, signal=29%
GO:0007210_SEROTONIN_RECEPTOR_SIGNALING_PATHWAY	GO:0007210_SEROTONIN_RECEPTOR_SIGNALING_PATHWAY		7	0.810419	1.603	0.0167598	0.0965317	0.999	1883	tags=57%, list=10%, signal=63%
GO:0006096_GLYCOLYTIC_PROCESS	GO:0006096_GLYCOLYTIC_PROCESS		21	0.63816	1.60206	0.0136519	0.0965523	0.999	3189	tags=52%, list=17%, signal=63%
GO:0002119_NEMATODE_LARVAL_DEVELOPMENT	GO:0002119_NEMATODE_LARVAL_DEVELOPMENT		206	0.441219	1.59585	0.0012987	0.10251	1	2871	tags=33%, list=15%, signal=38%
GO:1901215_NEGATIVE_REGULATION_OF_NEURON_DEATH	GO:1901215_NEGATIVE_REGULATION_OF_NEURON_DEATH		7	0.818292	1.59511	0.0222222	0.102034	1	1679	tags=43%, list=9%, signal=47%
GO:0007186_G-PROTEIN_COUPLED_RECEPTOR_SIGNALING_PATHWAY	GO:0007186_G-PROTEIN_COUPLED_RECEPTOR_SIGNALING_PATHWAY		302	0.424969	1.59236	0	0.1041	1	5451	tags=38%, list=29%, signal=52%
GO:0065009_REGULATION_OF_MOLECULAR_FUNCTION	GO:0065009_REGULATION_OF_MOLECULAR_FUNCTION		8	0.788544	1.58699	0.0234234	0.109696	1	2907	tags=63%, list=15%, signal=74%
GO:1904937_SENSORY_NEURON_MIGRATION	GO:1904937_SENSORY_NEURON_MIGRATION		7	0.822628	1.58548	0.00715563	0.11007	1	2930	tags=71%, list=15%, signal=84%
GO:1901076_POSITIVE_REGULATION_OF_ENGULFMENT_OF_APOPTOTIC_CELL	GO:1901076_POSITIVE_REGULATION_OF_ENGULFMENT_OF_APOPTOTIC_CELL		15	0.673342	1.58271	0.0318258	0.111936	1	403	tags=20%, list=2%, signal=20%
GO:0043050_PHARYNGEAL_PUMPING	GO:0043050_PHARYNGEAL_PUMPING		16	0.664838	1.57975	0.0257732	0.114234	1	2693	tags=56%, list=14%, signal=65%
GO:0015992_PROTON_TRANSPORT	GO:0015992_PROTON_TRANSPORT		37	0.555518	1.57722	0.0208333	0.116408	1	1904	tags=35%, list=10%, signal=39%
GO:0050821_PROTEIN_STABILIZATION	GO:0050821_PROTEIN_STABILIZATION		7	0.812761	1.57566	0.0198556	0.11732	1	337	tags=29%, list=2%, signal=29%
GO:0006754_ATP_BIOSYNTHETIC_PROCESS	GO:0006754_ATP_BIOSYNTHETIC_PROCESS		9	0.738611	1.57445	0.0176678	0.117725	1	3744	tags=56%, list=20%, signal=69%
GO:0090038_NEGATIVE_REGULATION_OF_PROTEIN_KINASE_C_SIGNALING	GO:0090038_NEGATIVE_REGULATION_OF_PROTEIN_KINASE_C_SIGNALING		7	0.817367	1.56936	0.0134615	0.123017	1	3441	tags=86%, list=18%, signal=105%
GO:0007413_AXONAL_FASCICULATION	GO:0007413_AXONAL_FASCICULATION		10	0.724475	1.56761	0.0246046	0.123889	1	2708	tags=60%, list=14%, signal=70%
GO:0009072_AROMATIC_AMINO_ACID_FAMILY_METABOLIC_PROCESS	GO:0009072_AROMATIC_AMINO_ACID_FAMILY_METABOLIC_PROCESS		10	0.746445	1.56611	0.0222222	0.124507	1	3264	tags=50%, list=17%, signal=60%
GO:0007274_NEUROMUSCULAR_SYNAPTIC_TRANSMISSION	GO:0007274_NEUROMUSCULAR_SYNAPTIC_TRANSMISSION		9	0.768861	1.56451	0.0252708	0.125281	1	1650	tags=56%, list=9%, signal=61%
GO:0007160_CELL-MATRIX_ADHESION	GO:0007160_CELL-MATRIX_ADHESION		9	0.759031	1.56174	0.0321429	0.127441	1	2859	tags=67%, list=15%, signal=78%
GO:1904936_INTERNEURON_MIGRATION	GO:1904936_INTERNEURON_MIGRATION		8	0.762874	1.56013	0.0299824	0.128288	1	2836	tags=50%, list=15%, signal=59%
GO:0007530_SEX_DETERMINATION	GO:0007530_SEX_DETERMINATION		6	0.819229	1.55659	0.0189753	0.131953	1	822	tags=50%, list=4%, signal=52%
GO:0007229_INTEGRIN-MEDIATED_SIGNALING_PATHWAY	GO:0007229_INTEGRIN-MEDIATED_SIGNALING_PATHWAY		9	0.741114	1.54841	0.0389381	0.142519	1	3767	tags=78%, list=20%, signal=97%
GO:0043068_POSITIVE_REGULATION_OF_PROGRAMMED_CELL_DEATH	GO:0043068_POSITIVE_REGULATION_OF_PROGRAMMED_CELL_DEATH		11	0.710188	1.5478	0.037037	0.14195	1	1439	tags=45%, list=8%, signal=49%
GO:0008277_REGULATION_OF_G-PROTEIN_COUPLED_RECEPTOR_PROTEIN_SIGNALING_PATHWAY	GO:0008277_REGULATION_OF_G-PROTEIN_COUPLED_RECEPTOR_PROTEIN_SIGNALING_PATHWAY		5	0.866899	1.54773	0.0151803	0.140639	1	1624	tags=60%, list=9%, signal=66%
GO:0048731_SYSTEM_DEVELOPMENT	GO:0048731_SYSTEM_DEVELOPMENT		6	0.835046	1.53245	0.0291971	0.161852	1	4	tags=17%, list=0%, signal=17%
GO:0016477_CELL_MIGRATION	GO:0016477_CELL_MIGRATION		59	0.494043	1.53143	0.0103397	0.161981	1	1642	tags=24%, list=9%, signal=26%
GO:0007165_SIGNAL_TRANSDUCTION	GO:0007165_SIGNAL_TRANSDUCTION		324	0.406002	1.53091	0	0.16114	1	3813	tags=30%, list=20%, signal=37%
GO:0019344_CYSTEINE_BIOSYNTHETIC_PROCESS	GO:0019344_CYSTEINE_BIOSYNTHETIC_PROCESS		5	0.862049	1.53074	0.0250965	0.159888	1	2623	tags=100%, list=14%, signal=116%
GO:0002064_EPITHELIAL_CELL_DEVELOPMENT	GO:0002064_EPITHELIAL_CELL_DEVELOPMENT		23	0.599057	1.52896	0.0310881	0.16115	1	4642	tags=57%, list=24%, signal=75%
GO:0071688_STRIATED_MUSCLE_MYOSIN_THICK_FILAMENT_ASSEMBLY	GO:0071688_STRIATED_MUSCLE_MYOSIN_THICK_FILAMENT_ASSEMBLY		7	0.774476	1.52745	0.0368421	0.161704	1	1658	tags=57%, list=9%, signal=63%
GO:0030030_CELL_PROJECTION_ORGANIZATION	GO:0030030_CELL_PROJECTION_ORGANIZATION		20	0.610723	1.52453	0.0301508	0.164749	1	4562	tags=55%, list=24%, signal=72%
GO:0045138_NEMATODE_MALE_TAIL_TIP_MORPHOGENESIS	GO:0045138_NEMATODE_MALE_TAIL_TIP_MORPHOGENESIS		73	0.475982	1.52219	0.0147275	0.166969	1	2861	tags=33%, list=15%, signal=39%
GO:0006972_HYPEROSMOTIC_RESPONSE	GO:0006972_HYPEROSMOTIC_RESPONSE		24	0.587474	1.52008	0.0286624	0.168606	1	1808	tags=25%, list=10%, signal=28%
GO:0009755_HORMONE-MEDIATED_SIGNALING_PATHWAY	GO:0009755_HORMONE-MEDIATED_SIGNALING_PATHWAY		14	0.656463	1.51614	0.0367776	0.173543	1	1265	tags=36%, list=7%, signal=38%
GO:0048812_NEURON_PROJECTION_MORPHOGENESIS	GO:0048812_NEURON_PROJECTION_MORPHOGENESIS		10	0.708273	1.51515	0.0412926	0.173711	1	1946	tags=50%, list=10%, signal=56%
GO:0006099_TRICARBOXYLIC_ACID_CYCLE	GO:0006099_TRICARBOXYLIC_ACID_CYCLE		25	0.597992	1.5142	0.0276074	0.17368	1	3051	tags=44%, list=16%, signal=52%
GO:0045773_POSITIVE_REGULATION_OF_AXON_EXTENSION	GO:0045773_POSITIVE_REGULATION_OF_AXON_EXTENSION		5	0.84487	1.51087	0.025878	0.177254	1	1645	tags=80%, list=9%, signal=88%
GO:0048814_REGULATION_OF_DENDRITE_MORPHOGENESIS	GO:0048814_REGULATION_OF_DENDRITE_MORPHOGENESIS		9	0.722905	1.50865	0.0415913	0.179233	1	1983	tags=33%, list=10%, signal=37%
GO:0032224_POSITIVE_REGULATION_OF_SYNAPTIC_TRANSMISSION,_CHOLINERGIC	GO:0032224_POSITIVE_REGULATION_OF_SYNAPTIC_TRANSMISSION,_CHOLINERGIC		7	0.76183	1.50744	0.0350553	0.179779	1	3918	tags=71%, list=21%, signal=90%
GO:0007200_PHOSPHOLIPASE_C-ACTIVATING_G-PROTEIN_COUPLED_RECEPTOR_SIGNALING_PATHWAY	GO:0007200_PHOSPHOLIPASE_C-ACTIVATING_G-PROTEIN_COUPLED_RECEPTOR_SIGNALING_PATHWAY		11	0.687439	1.50516	0.0492091	0.182184	1	58	tags=9%, list=0%, signal=9%
GO:0006751_GLUTATHIONE_CATABOLIC_PROCESS	GO:0006751_GLUTATHIONE_CATABOLIC_PROCESS		6	0.796987	1.50364	0.0407407	0.182995	1	3859	tags=100%, list=20%, signal=125%
GO:0035725_SODIUM_ION_TRANSMEMBRANE_TRANSPORT	GO:0035725_SODIUM_ION_TRANSMEMBRANE_TRANSPORT		52	0.503063	1.50004	0.0283019	0.187524	1	4000	tags=42%, list=21%, signal=53%
GO:0030536_LARVAL_FEEDING_BEHAVIOR	GO:0030536_LARVAL_FEEDING_BEHAVIOR		12	0.673395	1.49276	0.0408163	0.19515	1	1610	tags=42%, list=8%, signal=45%
GO:0035150_REGULATION_OF_TUBE_SIZE	GO:0035150_REGULATION_OF_TUBE_SIZE		9	0.729808	1.48886	0.0276243	0.198333	1	2502	tags=67%, list=13%, signal=77%
GO:0006334_NUCLEOSOME_ASSEMBLY	GO:0006334_NUCLEOSOME_ASSEMBLY		60	0.478029	1.4829	0.0247295	0.203333	1	3814	tags=45%, list=20%, signal=56%
GO:0046716_MUSCLE_CELL_CELLULAR_HOMEOSTASIS	GO:0046716_MUSCLE_CELL_CELLULAR_HOMEOSTASIS		5	0.832868	1.47585	0.0419048	0.212495	1	3177	tags=100%, list=17%, signal=120%
GO:0009190_CYCLIC_NUCLEOTIDE_BIOSYNTHETIC_PROCESS	GO:0009190_CYCLIC_NUCLEOTIDE_BIOSYNTHETIC_PROCESS		35	0.522833	1.47068	0.0386473	0.218529	1	3133	tags=29%, list=16%, signal=34%
GO:0006898_RECEPTOR-MEDIATED_ENDOCYTOSIS	GO:0006898_RECEPTOR-MEDIATED_ENDOCYTOSIS		22	0.57054	1.46944	0.0441177	0.217547	1	1778	tags=27%, list=9%, signal=30%
GO:1905515_NON-MOTILE_CILIUM_ASSEMBLY	GO:1905515_NON-MOTILE_CILIUM_ASSEMBLY		31	0.538817	1.46265	0.044702	0.22469	1	4575	tags=48%, list=24%, signal=64%
GO:0006182_CGMP_BIOSYNTHETIC_PROCESS	GO:0006182_CGMP_BIOSYNTHETIC_PROCESS		34	0.526132	1.44855	0.0432	0.232897	1	3133	tags=29%, list=16%, signal=35%
GO:0043401_STEROID_HORMONE_MEDIATED_SIGNALING_PATHWAY	GO:0043401_STEROID_HORMONE_MEDIATED_SIGNALING_PATHWAY		222	0.392567	1.43652	0.00770218	0.244328	1	3922	tags=27%, list=21%, signal=34%
GO:0009058_BIOSYNTHETIC_PROCESS	GO:0009058_BIOSYNTHETIC_PROCESS		29	0.532471	1.43382	0.0481728	0.246314	1	4888	tags=45%, list=26%, signal=60%

## Sheet: GFP_D1_O2_neg
NAME	GS<br> follow link to MSigDB	GS DETAILS	SIZE	ES	NES	NOM p-val	FDR q-val	FWER p-val	RANK AT MAX	LEADING EDGE
GO:0002181_CYTOPLASMIC_TRANSLATION	GO:0002181_CYTOPLASMIC_TRANSLATION	Details ...	23	-0.719179	-1.94168	0.00646552	0.105137	0.077	2693	tags=70%, list=16%, signal=83%
GO:0016246_RNA_INTERFERENCE	GO:0016246_RNA_INTERFERENCE	Details ...	36	-0.646182	-1.93321	0	0.0591191	0.087	2397	tags=39%, list=15%, signal=45%
GO:0000281_MITOTIC_CYTOKINESIS	GO:0000281_MITOTIC_CYTOKINESIS	Details ...	24	-0.710995	-1.93306	0	0.0394127	0.087	2812	tags=58%, list=17%, signal=70%
GO:0000027_RIBOSOMAL_LARGE_SUBUNIT_ASSEMBLY	GO:0000027_RIBOSOMAL_LARGE_SUBUNIT_ASSEMBLY	Details ...	24	-0.692663	-1.88227	0	0.0705661	0.202	4175	tags=79%, list=25%, signal=106%
GO:0007281_GERM_CELL_DEVELOPMENT	GO:0007281_GERM_CELL_DEVELOPMENT	Details ...	40	-0.62739	-1.87297	0.00219298	0.0671713	0.234	1270	tags=23%, list=8%, signal=24%
GO:0048599_OOCYTE_DEVELOPMENT	GO:0048599_OOCYTE_DEVELOPMENT	Details ...	13	-0.783609	-1.86571	0.00601202	0.0626115	0.257	2050	tags=54%, list=12%, signal=61%
GO:0061158_3'-UTR-MEDIATED_MRNA_DESTABILIZATION	GO:0061158_3'-UTR-MEDIATED_MRNA_DESTABILIZATION	Details ...	12	-0.8206	-1.85713	0	0.0601334	0.278	353	tags=25%, list=2%, signal=26%
GO:0007283_SPERMATOGENESIS	GO:0007283_SPERMATOGENESIS	Details ...	36	-0.60069	-1.80626	0.00638298	0.109579	0.482	3594	tags=42%, list=22%, signal=53%
GO:0051301_CELL_DIVISION	GO:0051301_CELL_DIVISION	Details ...	124	-0.481329	-1.79362	0	0.116788	0.544	4188	tags=46%, list=25%, signal=61%
GO:0032436_POSITIVE_REGULATION_OF_PROTEASOMAL_UBIQUITIN-DEPENDENT_PROTEIN_CATABOLIC_PROCESS	GO:0032436_POSITIVE_REGULATION_OF_PROTEASOMAL_UBIQUITIN-DEPENDENT_PROTEIN_CATABOLIC_PROCESS	Details ...	17	-0.697953	-1.7712	0.00211416	0.145093	0.684	2348	tags=47%, list=14%, signal=55%
GO:0000212_MEIOTIC_SPINDLE_ORGANIZATION	GO:0000212_MEIOTIC_SPINDLE_ORGANIZATION	Details ...	11	-0.789321	-1.76567	0.00407332	0.141736	0.707	1269	tags=55%, list=8%, signal=59%
GO:0006412_TRANSLATION	GO:0006412_TRANSLATION	Details ...	193	-0.454704	-1.75491	0	0.15063	0.761	3725	tags=43%, list=23%, signal=55%
GO:1903616_MAPK_CASCADE_INVOLVED_IN_AXON_REGENERATION	GO:1903616_MAPK_CASCADE_INVOLVED_IN_AXON_REGENERATION	Details ...	8	-0.835438	-1.74999	0.00394477	0.149172	0.785	563	tags=50%, list=3%, signal=52%
GO:0007049_CELL_CYCLE	GO:0007049_CELL_CYCLE	Details ...	152	-0.466529	-1.73715	0	0.165075	0.836	4349	tags=45%, list=26%, signal=60%
GO:0042981_REGULATION_OF_APOPTOTIC_PROCESS	GO:0042981_REGULATION_OF_APOPTOTIC_PROCESS	Details ...	39	-0.575906	-1.73476	0.00423729	0.158861	0.848	958	tags=23%, list=6%, signal=24%
GO:0018107_PEPTIDYL-THREONINE_PHOSPHORYLATION	GO:0018107_PEPTIDYL-THREONINE_PHOSPHORYLATION	Details ...	25	-0.634781	-1.72597	0.00845666	0.167048	0.878	1270	tags=28%, list=8%, signal=30%
GO:0042073_INTRACILIARY_TRANSPORT	GO:0042073_INTRACILIARY_TRANSPORT	Details ...	15	-0.707658	-1.72538	0.00630252	0.158965	0.88	2367	tags=53%, list=14%, signal=62%
GO:0060271_CILIUM_ASSEMBLY	GO:0060271_CILIUM_ASSEMBLY	Details ...	42	-0.561419	-1.72113	0.00681818	0.159386	0.897	2307	tags=24%, list=14%, signal=28%
GO:0060282_POSITIVE_REGULATION_OF_OOCYTE_DEVELOPMENT	GO:0060282_POSITIVE_REGULATION_OF_OOCYTE_DEVELOPMENT	Details ...	9	-0.816067	-1.71032	0.00619835	0.173538	0.926	1502	tags=56%, list=9%, signal=61%
GO:0009790_EMBRYO_DEVELOPMENT	GO:0009790_EMBRYO_DEVELOPMENT	Details ...	10	-0.792605	-1.69926	0.0103093	0.187119	0.944	2091	tags=50%, list=13%, signal=57%
GO:0032147_ACTIVATION_OF_PROTEIN_KINASE_ACTIVITY	GO:0032147_ACTIVATION_OF_PROTEIN_KINASE_ACTIVITY		15	-0.688849	-1.69518	0.0130719	0.187479	0.948	1843	tags=40%, list=11%, signal=45%
GO:0007129_SYNAPSIS	GO:0007129_SYNAPSIS		6	-0.892969	-1.69483	0.00197628	0.179552	0.948	936	tags=50%, list=6%, signal=53%
GO:0043409_NEGATIVE_REGULATION_OF_MAPK_CASCADE	GO:0043409_NEGATIVE_REGULATION_OF_MAPK_CASCADE		5	-0.933656	-1.68779	0	0.187831	0.959	42	tags=20%, list=0%, signal=20%
GO:0007130_SYNAPTONEMAL_COMPLEX_ASSEMBLY	GO:0007130_SYNAPTONEMAL_COMPLEX_ASSEMBLY		5	-0.900431	-1.68686	0.00399202	0.181621	0.96	629	tags=40%, list=4%, signal=42%
GO:0000045_AUTOPHAGOSOME_ASSEMBLY	GO:0000045_AUTOPHAGOSOME_ASSEMBLY		18	-0.669906	-1.68221	0.0127932	0.184191	0.964	2274	tags=44%, list=14%, signal=51%
GO:0051726_REGULATION_OF_CELL_CYCLE	GO:0051726_REGULATION_OF_CELL_CYCLE		24	-0.61086	-1.67899	0.00862069	0.183756	0.968	4172	tags=50%, list=25%, signal=67%
GO:0051321_MEIOTIC_CELL_CYCLE	GO:0051321_MEIOTIC_CELL_CYCLE		85	-0.487737	-1.67376	0	0.188677	0.971	3010	tags=35%, list=18%, signal=43%
GO:0045132_MEIOTIC_CHROMOSOME_SEGREGATION	GO:0045132_MEIOTIC_CHROMOSOME_SEGREGATION		16	-0.662277	-1.67161	0.0111111	0.185734	0.972	2208	tags=44%, list=13%, signal=50%
GO:0006974_CELLULAR_RESPONSE_TO_DNA_DAMAGE_STIMULUS	GO:0006974_CELLULAR_RESPONSE_TO_DNA_DAMAGE_STIMULUS		63	-0.508228	-1.67105	0.00930233	0.180456	0.972	3606	tags=44%, list=22%, signal=57%
GO:1905808_POSITIVE_REGULATION_OF_SYNAPSE_DISASSEMBLY	GO:1905808_POSITIVE_REGULATION_OF_SYNAPSE_DISASSEMBLY		6	-0.877887	-1.66327	0.00609756	0.191715	0.978	1423	tags=50%, list=9%, signal=55%
GO:0042176_REGULATION_OF_PROTEIN_CATABOLIC_PROCESS	GO:0042176_REGULATION_OF_PROTEIN_CATABOLIC_PROCESS		6	-0.862398	-1.66297	0.00386847	0.186036	0.978	793	tags=33%, list=5%, signal=35%
GO:0032456_ENDOCYTIC_RECYCLING	GO:0032456_ENDOCYTIC_RECYCLING		12	-0.722449	-1.65943	0.0127932	0.18672	0.98	2604	tags=50%, list=16%, signal=59%
GO:0006270_DNA_REPLICATION_INITIATION	GO:0006270_DNA_REPLICATION_INITIATION		11	-0.733228	-1.65809	0.0247934	0.183341	0.981	1525	tags=55%, list=9%, signal=60%
GO:0097120_RECEPTOR_LOCALIZATION_TO_SYNAPSE	GO:0097120_RECEPTOR_LOCALIZATION_TO_SYNAPSE		6	-0.864761	-1.65432	0.00823045	0.18588	0.983	827	tags=50%, list=5%, signal=53%
GO:0000463_MATURATION_OF_LSU-RRNA_FROM_TRICISTRONIC_RRNA_TRANSCRIPT_(SSU-RRNA,_5.8S_RRNA,_LSU-RRNA)	GO:0000463_MATURATION_OF_LSU-RRNA_FROM_TRICISTRONIC_RRNA_TRANSCRIPT_(SSU-RRNA,_5.8S_RRNA,_LSU-RRNA)		6	-0.854238	-1.65384	0.00803213	0.18173	0.984	1695	tags=83%, list=10%, signal=93%
GO:0040007_GROWTH	GO:0040007_GROWTH		10	-0.751643	-1.65371	0.00817996	0.176933	0.984	2713	tags=50%, list=16%, signal=60%
GO:1902742_APOPTOTIC_PROCESS_INVOLVED_IN_DEVELOPMENT	GO:1902742_APOPTOTIC_PROCESS_INVOLVED_IN_DEVELOPMENT		12	-0.69982	-1.65348	0.0258964	0.172497	0.984	133	tags=17%, list=1%, signal=17%
GO:0006030_CHITIN_METABOLIC_PROCESS	GO:0006030_CHITIN_METABOLIC_PROCESS		11	-0.726016	-1.63149	0.0182927	0.215391	0.994	3021	tags=55%, list=18%, signal=67%
GO:0010165_RESPONSE_TO_X-RAY	GO:0010165_RESPONSE_TO_X-RAY		10	-0.73945	-1.62577	0.0211416	0.223953	0.995	2261	tags=70%, list=14%, signal=81%
GO:0007098_CENTROSOME_CYCLE	GO:0007098_CENTROSOME_CYCLE		7	-0.802085	-1.62387	0.0216535	0.22317	0.996	2897	tags=86%, list=18%, signal=104%
GO:1905342_POSITIVE_REGULATION_OF_PROTEIN_LOCALIZATION_TO_KINETOCHORE	GO:1905342_POSITIVE_REGULATION_OF_PROTEIN_LOCALIZATION_TO_KINETOCHORE		7	-0.821633	-1.62303	0.0162602	0.219795	0.996	898	tags=57%, list=5%, signal=60%
GO:0006657_CDP-CHOLINE_PATHWAY	GO:0006657_CDP-CHOLINE_PATHWAY		6	-0.844335	-1.62283	0.0126316	0.21488	0.996	56	tags=17%, list=0%, signal=17%
GO:0048691_POSITIVE_REGULATION_OF_AXON_EXTENSION_INVOLVED_IN_REGENERATION	GO:0048691_POSITIVE_REGULATION_OF_AXON_EXTENSION_INVOLVED_IN_REGENERATION		7	-0.814408	-1.61128	0.0268595	0.237401	0.998	1725	tags=57%, list=10%, signal=64%
GO:0007032_ENDOSOME_ORGANIZATION	GO:0007032_ENDOSOME_ORGANIZATION		9	-0.764022	-1.61125	0.0218688	0.232005	0.998	598	tags=33%, list=4%, signal=35%
GO:0046686_RESPONSE_TO_CADMIUM_ION	GO:0046686_RESPONSE_TO_CADMIUM_ION		7	-0.802515	-1.6093	0.0123711	0.231063	0.998	551	tags=29%, list=3%, signal=30%
GO:1903394_PROTEIN_LOCALIZATION_TO_KINETOCHORE_INVOLVED_IN_KINETOCHORE_ASSEMBLY	GO:1903394_PROTEIN_LOCALIZATION_TO_KINETOCHORE_INVOLVED_IN_KINETOCHORE_ASSEMBLY		5	-0.883578	-1.6056	0.00585938	0.234474	0.998	898	tags=60%, list=5%, signal=63%
GO:0048815_HERMAPHRODITE_GENITALIA_MORPHOGENESIS	GO:0048815_HERMAPHRODITE_GENITALIA_MORPHOGENESIS		9	-0.752055	-1.60327	0.0207469	0.23517	0.998	1969	tags=56%, list=12%, signal=63%
GO:0030042_ACTIN_FILAMENT_DEPOLYMERIZATION	GO:0030042_ACTIN_FILAMENT_DEPOLYMERIZATION		8	-0.77911	-1.59945	0.0140562	0.239404	0.998	1423	tags=38%, list=9%, signal=41%
GO:0009792_EMBRYO_DEVELOPMENT_ENDING_IN_BIRTH_OR_EGG_HATCHING	GO:0009792_EMBRYO_DEVELOPMENT_ENDING_IN_BIRTH_OR_EGG_HATCHING		270	-0.395686	-1.59759	0	0.238732	0.998	4046	tags=38%, list=25%, signal=50%
GO:0000028_RIBOSOMAL_SMALL_SUBUNIT_ASSEMBLY	GO:0000028_RIBOSOMAL_SMALL_SUBUNIT_ASSEMBLY		13	-0.674396	-1.59669	0.0321199	0.23621	0.998	1066	tags=38%, list=6%, signal=41%
GO:0034968_HISTONE_LYSINE_METHYLATION	GO:0034968_HISTONE_LYSINE_METHYLATION		7	-0.789614	-1.58966	0.022	0.247856	0.999	2488	tags=71%, list=15%, signal=84%
GO:0000460_MATURATION_OF_5.8S_RRNA	GO:0000460_MATURATION_OF_5.8S_RRNA		9	-0.739839	-1.5888	0.0241449	0.244833	0.999	2571	tags=44%, list=16%, signal=53%
GO:0045977_POSITIVE_REGULATION_OF_MITOTIC_CELL_CYCLE,_EMBRYONIC	GO:0045977_POSITIVE_REGULATION_OF_MITOTIC_CELL_CYCLE,_EMBRYONIC		5	-0.862512	-1.58677	0.0103093	0.244154	1	1088	tags=60%, list=7%, signal=64%

## Sheet: GFP_D1_O2_pos
NAME	GS<br> follow link to MSigDB	GS DETAILS	SIZE	ES	NES	NOM p-val	FDR q-val	FWER p-val	RANK AT MAX	LEADING EDGE
GO:0006869_LIPID_TRANSPORT	GO:0006869_LIPID_TRANSPORT	Details ...	23	0.733683	1.92184	0	0.0354124	0.093	553	tags=22%, list=3%, signal=22%
GO:0007218_NEUROPEPTIDE_SIGNALING_PATHWAY	GO:0007218_NEUROPEPTIDE_SIGNALING_PATHWAY	Details ...	88	0.628741	2.03904	0	0.00794866	0.011	823	tags=24%, list=5%, signal=25%

## Sheet: WW_D7_O2_neg
NAME	GS<br> follow link to MSigDB	GS DETAILS	SIZE	ES	NES	NOM p-val	FDR q-val	FWER p-val	RANK AT MAX	LEADING EDGE
GO:0030163_PROTEIN_CATABOLIC_PROCESS	GO:0030163_PROTEIN_CATABOLIC_PROCESS	Details ...	30	-0.866458	-2.3313	0	0.000754355	0.001	386	tags=27%, list=2%, signal=27%
GO:0006869_LIPID_TRANSPORT	GO:0006869_LIPID_TRANSPORT	Details ...	25	-0.807549	-2.13412	0	0.00153377	0.004	377	tags=24%, list=2%, signal=24%
GO:0045087_INNATE_IMMUNE_RESPONSE	GO:0045087_INNATE_IMMUNE_RESPONSE	Details ...	267	-0.546313	-2.08449	0	0.00257343	0.01	3130	tags=33%, list=17%, signal=39%
GO:0051603_PROTEOLYSIS_INVOLVED_IN_CELLULAR_PROTEIN_CATABOLIC_PROCESS	GO:0051603_PROTEOLYSIS_INVOLVED_IN_CELLULAR_PROTEIN_CATABOLIC_PROCESS	Details ...	44	-0.665719	-1.94263	0	0.0395437	0.184	736	tags=25%, list=4%, signal=26%
GO:0050829_DEFENSE_RESPONSE_TO_GRAM-NEGATIVE_BACTERIUM	GO:0050829_DEFENSE_RESPONSE_TO_GRAM-NEGATIVE_BACTERIUM	Details ...	94	-0.557569	-1.88602	0	0.0740266	0.38	2738	tags=34%, list=15%, signal=40%
GO:0010951_NEGATIVE_REGULATION_OF_ENDOPEPTIDASE_ACTIVITY	GO:0010951_NEGATIVE_REGULATION_OF_ENDOPEPTIDASE_ACTIVITY	Details ...	48	-0.622291	-1.87685	0	0.0687625	0.414	3802	tags=48%, list=21%, signal=60%
GO:0007638_MECHANOSENSORY_BEHAVIOR	GO:0007638_MECHANOSENSORY_BEHAVIOR	Details ...	27	-0.694747	-1.86086	0.00348432	0.0743467	0.495	2056	tags=44%, list=11%, signal=50%
GO:0006936_MUSCLE_CONTRACTION	GO:0006936_MUSCLE_CONTRACTION	Details ...	17	-0.753536	-1.84531	0.00511073	0.0802581	0.565	948	tags=41%, list=5%, signal=43%
GO:0006508_PROTEOLYSIS	GO:0006508_PROTEOLYSIS	Details ...	340	-0.471295	-1.83335	0	0.0831958	0.62	1194	tags=15%, list=6%, signal=15%
GO:0050976_DETECTION_OF_MECHANICAL_STIMULUS_INVOLVED_IN_SENSORY_PERCEPTION_OF_TOUCH	GO:0050976_DETECTION_OF_MECHANICAL_STIMULUS_INVOLVED_IN_SENSORY_PERCEPTION_OF_TOUCH	Details ...	12	-0.790181	-1.82778	0.00377358	0.0793437	0.631	2056	tags=58%, list=11%, signal=66%
GO:0007160_CELL-MATRIX_ADHESION	GO:0007160_CELL-MATRIX_ADHESION	Details ...	9	-0.865929	-1.81362	0.00546448	0.084788	0.7	1091	tags=56%, list=6%, signal=59%
GO:0060279_POSITIVE_REGULATION_OF_OVULATION	GO:0060279_POSITIVE_REGULATION_OF_OVULATION	Details ...	8	-0.871328	-1.78826	0.00178253	0.103553	0.787	605	tags=50%, list=3%, signal=52%
GENES_LINKED_TO_CA2+_SIGNALLING	GENES_LINKED_TO_CA2+_SIGNALLING	Details ...	40	-0.533856	-1.5603	0.0209003	0.200278	0.148	2739	tags=33%, list=15%, signal=38%

## Sheet: WW_D7_O2_pos
NAME	GS<br> follow link to MSigDB	GS DETAILS	SIZE	ES	NES	NOM p-val	FDR q-val	FWER p-val	RANK AT MAX	LEADING EDGE
GO:0006260_DNA_REPLICATION	GO:0006260_DNA_REPLICATION	Details ...	53	0.696721	2.37854	0	0	0	3898	tags=58%, list=21%, signal=74%
GO:0007049_CELL_CYCLE	GO:0007049_CELL_CYCLE	Details ...	153	0.557016	2.21888	0	0	0	4347	tags=54%, list=24%, signal=70%
GO:0051301_CELL_DIVISION	GO:0051301_CELL_DIVISION	Details ...	124	0.553428	2.17466	0	0	0	4347	tags=52%, list=24%, signal=67%
GO:0006417_REGULATION_OF_TRANSLATION	GO:0006417_REGULATION_OF_TRANSLATION	Details ...	36	0.660168	2.08106	0	0.00100178	0.006	4204	tags=56%, list=23%, signal=72%
GO:0051321_MEIOTIC_CELL_CYCLE	GO:0051321_MEIOTIC_CELL_CYCLE	Details ...	85	0.564092	2.11494	0	0.00101489	0.003	3792	tags=49%, list=21%, signal=62%
GO:0000278_MITOTIC_CELL_CYCLE	GO:0000278_MITOTIC_CELL_CYCLE	Details ...	18	0.765564	2.06941	0	0.00106485	0.008	2434	tags=56%, list=13%, signal=64%
GO:0090305_NUCLEIC_ACID_PHOSPHODIESTER_BOND_HYDROLYSIS	GO:0090305_NUCLEIC_ACID_PHOSPHODIESTER_BOND_HYDROLYSIS	Details ...	48	0.625176	2.11023	0	0.00107842	0.004	4517	tags=56%, list=24%, signal=74%
GO:0032508_DNA_DUPLEX_UNWINDING	GO:0032508_DNA_DUPLEX_UNWINDING	Details ...	36	0.66428	2.10286	0	0.00111669	0.005	3898	tags=50%, list=21%, signal=63%
GO:0006412_TRANSLATION	GO:0006412_TRANSLATION	Details ...	198	0.504402	2.09283	0	0.00114489	0.006	3834	tags=45%, list=21%, signal=57%
GO:0006886_INTRACELLULAR_PROTEIN_TRANSPORT	GO:0006886_INTRACELLULAR_PROTEIN_TRANSPORT	Details ...	90	0.551679	2.06986	0	0.00118317	0.008	3477	tags=43%, list=19%, signal=53%
GO:0007059_CHROMOSOME_SEGREGATION	GO:0007059_CHROMOSOME_SEGREGATION	Details ...	37	0.650025	2.049	0	0.00131723	0.011	3827	tags=62%, list=21%, signal=78%
GO:0006974_CELLULAR_RESPONSE_TO_DNA_DAMAGE_STIMULUS	GO:0006974_CELLULAR_RESPONSE_TO_DNA_DAMAGE_STIMULUS	Details ...	65	0.556196	1.96705	0	0.00630512	0.058	3898	tags=49%, list=21%, signal=62%
GO:0006270_DNA_REPLICATION_INITIATION	GO:0006270_DNA_REPLICATION_INITIATION	Details ...	13	0.768684	1.92179	0	0.0114219	0.112	2707	tags=46%, list=15%, signal=54%
GO:0000712_RESOLUTION_OF_MEIOTIC_RECOMBINATION_INTERMEDIATES	GO:0000712_RESOLUTION_OF_MEIOTIC_RECOMBINATION_INTERMEDIATES	Details ...	14	0.76602	1.91116	0	0.0132197	0.139	2976	tags=64%, list=16%, signal=77%
GO:0006281_DNA_REPAIR	GO:0006281_DNA_REPAIR	Details ...	115	0.493262	1.9033	0	0.0139657	0.153	3898	tags=42%, list=21%, signal=53%
GO:0006397_MRNA_PROCESSING	GO:0006397_MRNA_PROCESSING	Details ...	71	0.515211	1.88723	0	0.0145704	0.194	4024	tags=49%, list=22%, signal=63%
GO:0008033_TRNA_PROCESSING	GO:0008033_TRNA_PROCESSING	Details ...	38	0.592548	1.89583	0	0.0149514	0.172	3638	tags=45%, list=20%, signal=56%
GO:0000398_MRNA_SPLICING,_VIA_SPLICEOSOME	GO:0000398_MRNA_SPLICING,_VIA_SPLICEOSOME	Details ...	67	0.531574	1.89111	0	0.0149872	0.18	4522	tags=42%, list=25%, signal=55%
GO:0007281_GERM_CELL_DEVELOPMENT	GO:0007281_GERM_CELL_DEVELOPMENT	Details ...	40	0.581284	1.88835	0	0.0152346	0.192	4263	tags=48%, list=23%, signal=62%
GO:0010165_RESPONSE_TO_X-RAY	GO:0010165_RESPONSE_TO_X-RAY	Details ...	10	0.832849	1.86663	0	0.0196605	0.263	1450	tags=70%, list=8%, signal=76%
GO:0000070_MITOTIC_SISTER_CHROMATID_SEGREGATION	GO:0000070_MITOTIC_SISTER_CHROMATID_SEGREGATION		25	0.640415	1.85674	0	0.0206331	0.301	4531	tags=68%, list=25%, signal=90%
GO:0006606_PROTEIN_IMPORT_INTO_NUCLEUS	GO:0006606_PROTEIN_IMPORT_INTO_NUCLEUS		25	0.64171	1.84462	0	0.0212957	0.342	4993	tags=64%, list=27%, signal=88%
GO:0048477_OOGENESIS	GO:0048477_OOGENESIS		44	0.538936	1.74051	0	0.0669514	0.832	4323	tags=57%, list=23%, signal=74%
GO:0006366_TRANSCRIPTION_FROM_RNA_POLYMERASE_II_PROMOTER	GO:0006366_TRANSCRIPTION_FROM_RNA_POLYMERASE_II_PROMOTER		67	0.453716	1.65281	0	0.146787	0.993	2465	tags=24%, list=13%, signal=27%
GO:0006470_PROTEIN_DEPHOSPHORYLATION	GO:0006470_PROTEIN_DEPHOSPHORYLATION		143	0.392588	1.58088	0	0.1944	1	2350	tags=24%, list=13%, signal=28%
GO:0043547_POSITIVE_REGULATION_OF_GTPASE_ACTIVITY	GO:0043547_POSITIVE_REGULATION_OF_GTPASE_ACTIVITY		109	0.3958	1.53495	0	0.219948	1	3477	tags=34%, list=19%, signal=42%
GO:0007099_CENTRIOLE_REPLICATION	GO:0007099_CENTRIOLE_REPLICATION		5	0.886847	1.68756	0.0021097	0.108549	0.969	1962	tags=80%, list=11%, signal=89%
GO:0051276_CHROMOSOME_ORGANIZATION	GO:0051276_CHROMOSOME_ORGANIZATION		9	0.7791	1.75678	0.00217865	0.0595054	0.767	1154	tags=44%, list=6%, signal=47%
GO:0006378_MRNA_POLYADENYLATION	GO:0006378_MRNA_POLYADENYLATION		14	0.736271	1.85319	0.00222222	0.0207636	0.316	2832	tags=50%, list=15%, signal=59%
GO:0000212_MEIOTIC_SPINDLE_ORGANIZATION	GO:0000212_MEIOTIC_SPINDLE_ORGANIZATION		11	0.773655	1.84197	0.00224215	0.0212804	0.354	1247	tags=55%, list=7%, signal=58%
GO:0030261_CHROMOSOME_CONDENSATION	GO:0030261_CHROMOSOME_CONDENSATION		10	0.787879	1.81134	0.00228833	0.0316287	0.505	2245	tags=40%, list=12%, signal=46%
GO:0010501_RNA_SECONDARY_STRUCTURE_UNWINDING	GO:0010501_RNA_SECONDARY_STRUCTURE_UNWINDING		36	0.538625	1.67369	0.00251256	0.120997	0.984	3167	tags=36%, list=17%, signal=44%
GO:0006413_TRANSLATIONAL_INITIATION	GO:0006413_TRANSLATIONAL_INITIATION		38	0.505838	1.62574	0.00253165	0.159108	0.996	1776	tags=21%, list=10%, signal=23%
GO:0010468_REGULATION_OF_GENE_EXPRESSION	GO:0010468_REGULATION_OF_GENE_EXPRESSION		61	0.490493	1.70987	0.00299401	0.0879175	0.927	3530	tags=41%, list=19%, signal=51%
GO:0000003_REPRODUCTION	GO:0000003_REPRODUCTION		108	0.408274	1.58259	0.00318471	0.196815	1	2748	tags=31%, list=15%, signal=36%
GO:0007095_MITOTIC_G2_DNA_DAMAGE_CHECKPOINT	GO:0007095_MITOTIC_G2_DNA_DAMAGE_CHECKPOINT		5	0.869451	1.64484	0.00412371	0.15008	0.996	1364	tags=40%, list=7%, signal=43%
GO:0035966_RESPONSE_TO_TOPOLOGICALLY_INCORRECT_PROTEIN	GO:0035966_RESPONSE_TO_TOPOLOGICALLY_INCORRECT_PROTEIN		8	0.789853	1.71471	0.00414079	0.0845131	0.916	2806	tags=63%, list=15%, signal=74%
GO:0016070_RNA_METABOLIC_PROCESS	GO:0016070_RNA_METABOLIC_PROCESS		6	0.85405	1.70538	0.00416667	0.0885961	0.938	1819	tags=67%, list=10%, signal=74%
GO:0006379_MRNA_CLEAVAGE	GO:0006379_MRNA_CLEAVAGE		11	0.781174	1.84635	0.00430108	0.0215294	0.334	2577	tags=64%, list=14%, signal=74%
GO:0016925_PROTEIN_SUMOYLATION	GO:0016925_PROTEIN_SUMOYLATION		14	0.758749	1.83642	0.004662	0.021965	0.375	2176	tags=50%, list=12%, signal=57%
GO:0045132_MEIOTIC_CHROMOSOME_SEGREGATION	GO:0045132_MEIOTIC_CHROMOSOME_SEGREGATION		18	0.701014	1.85881	0.00468384	0.0210138	0.292	4005	tags=67%, list=22%, signal=85%
GO:0006396_RNA_PROCESSING	GO:0006396_RNA_PROCESSING		38	0.539094	1.66795	0.00493827	0.126706	0.989	4190	tags=53%, list=23%, signal=68%
GO:0030422_PRODUCTION_OF_SIRNA_INVOLVED_IN_RNA_INTERFERENCE	GO:0030422_PRODUCTION_OF_SIRNA_INVOLVED_IN_RNA_INTERFERENCE		9	0.774946	1.75288	0.00635593	0.0585958	0.781	1760	tags=56%, list=10%, signal=61%
GO:0002181_CYTOPLASMIC_TRANSLATION	GO:0002181_CYTOPLASMIC_TRANSLATION		23	0.620653	1.77575	0.00700935	0.0489743	0.682	3574	tags=48%, list=19%, signal=59%
GO:0016569_COVALENT_CHROMATIN_MODIFICATION	GO:0016569_COVALENT_CHROMATIN_MODIFICATION		52	0.4726	1.62621	0.00767263	0.164261	0.996	3302	tags=40%, list=18%, signal=49%
GO:0008380_RNA_SPLICING	GO:0008380_RNA_SPLICING		47	0.463311	1.57162	0.008	0.19398	1	2303	tags=30%, list=12%, signal=34%
GO:0006360_TRANSCRIPTION_FROM_RNA_POLYMERASE_I_PROMOTER	GO:0006360_TRANSCRIPTION_FROM_RNA_POLYMERASE_I_PROMOTER		12	0.710198	1.73031	0.0090703	0.0734743	0.867	4491	tags=58%, list=24%, signal=77%
GO:0051307_MEIOTIC_CHROMOSOME_SEPARATION	GO:0051307_MEIOTIC_CHROMOSOME_SEPARATION		12	0.735397	1.76897	0.00909091	0.0514922	0.714	1324	tags=42%, list=7%, signal=45%
GO:0099132_ATP_HYDROLYSIS_COUPLED_CATION_TRANSMEMBRANE_TRANSPORT	GO:0099132_ATP_HYDROLYSIS_COUPLED_CATION_TRANSMEMBRANE_TRANSPORT		22	0.568246	1.57557	0.00950119	0.192995	1	3811	tags=50%, list=21%, signal=63%
GO:0000027_RIBOSOMAL_LARGE_SUBUNIT_ASSEMBLY	GO:0000027_RIBOSOMAL_LARGE_SUBUNIT_ASSEMBLY		24	0.598081	1.72408	0.00961539	0.0781811	0.892	5130	tags=75%, list=28%, signal=104%
GO:0007283_SPERMATOGENESIS	GO:0007283_SPERMATOGENESIS		44	0.494516	1.6452	0.00997506	0.152746	0.996	3652	tags=50%, list=20%, signal=62%
GO:0033962_CYTOPLASMIC_MRNA_PROCESSING_BODY_ASSEMBLY	GO:0033962_CYTOPLASMIC_MRNA_PROCESSING_BODY_ASSEMBLY		5	0.845214	1.57592	0.0112613	0.195142	1	2367	tags=60%, list=13%, signal=69%
GO:0009411_RESPONSE_TO_UV	GO:0009411_RESPONSE_TO_UV		16	0.695094	1.75401	0.0121065	0.0597023	0.776	1221	tags=50%, list=7%, signal=53%
GO:0016246_RNA_INTERFERENCE	GO:0016246_RNA_INTERFERENCE		35	0.525854	1.62417	0.0121065	0.158453	0.996	4517	tags=51%, list=24%, signal=68%
GO:0035335_PEPTIDYL-TYROSINE_DEPHOSPHORYLATION	GO:0035335_PEPTIDYL-TYROSINE_DEPHOSPHORYLATION		91	0.399658	1.52226	0.0123457	0.22632	1	2350	tags=25%, list=13%, signal=29%
GO:0036297_INTERSTRAND_CROSS-LINK_REPAIR	GO:0036297_INTERSTRAND_CROSS-LINK_REPAIR		6	0.823664	1.6162	0.0125523	0.160577	0.997	1298	tags=50%, list=7%, signal=54%
GO:0030703_EGGSHELL_FORMATION	GO:0030703_EGGSHELL_FORMATION		10	0.70869	1.64997	0.012931	0.148434	0.994	1407	tags=50%, list=8%, signal=54%
GO:0051306_MITOTIC_SISTER_CHROMATID_SEPARATION	GO:0051306_MITOTIC_SISTER_CHROMATID_SEPARATION		7	0.77567	1.63512	0.0147992	0.159485	0.996	1830	tags=57%, list=10%, signal=63%
GO:0071897_DNA_BIOSYNTHETIC_PROCESS	GO:0071897_DNA_BIOSYNTHETIC_PROCESS		11	0.684325	1.62307	0.0160183	0.154811	0.997	3886	tags=64%, list=21%, signal=81%
GO:0000028_RIBOSOMAL_SMALL_SUBUNIT_ASSEMBLY	GO:0000028_RIBOSOMAL_SMALL_SUBUNIT_ASSEMBLY		13	0.657923	1.62579	0.0165877	0.161958	0.996	5629	tags=77%, list=31%, signal=111%
GO:0031145_ANAPHASE-PROMOTING_COMPLEX-DEPENDENT_CATABOLIC_PROCESS	GO:0031145_ANAPHASE-PROMOTING_COMPLEX-DEPENDENT_CATABOLIC_PROCESS		6	0.817745	1.60191	0.0169492	0.172734	0.999	2661	tags=67%, list=14%, signal=78%
GO:0006298_MISMATCH_REPAIR	GO:0006298_MISMATCH_REPAIR		9	0.726806	1.63146	0.0171306	0.162283	0.996	1710	tags=44%, list=9%, signal=49%
GO:0007098_CENTROSOME_CYCLE	GO:0007098_CENTROSOME_CYCLE		7	0.78655	1.62811	0.0171306	0.164405	0.996	843	tags=57%, list=5%, signal=60%
GO:0000724_DOUBLE-STRAND_BREAK_REPAIR_VIA_HOMOLOGOUS_RECOMBINATION	GO:0000724_DOUBLE-STRAND_BREAK_REPAIR_VIA_HOMOLOGOUS_RECOMBINATION		17	0.642741	1.70717	0.0173536	0.0887514	0.934	2753	tags=53%, list=15%, signal=62%
GO:0043248_PROTEASOME_ASSEMBLY	GO:0043248_PROTEASOME_ASSEMBLY		10	0.701891	1.62395	0.0173536	0.156038	0.996	1939	tags=40%, list=11%, signal=45%
GO:0030866_CORTICAL_ACTIN_CYTOSKELETON_ORGANIZATION	GO:0030866_CORTICAL_ACTIN_CYTOSKELETON_ORGANIZATION		9	0.750266	1.68447	0.0177384	0.109615	0.975	2036	tags=56%, list=11%, signal=62%
GO:0006383_TRANSCRIPTION_FROM_RNA_POLYMERASE_III_PROMOTER	GO:0006383_TRANSCRIPTION_FROM_RNA_POLYMERASE_III_PROMOTER		17	0.616255	1.61986	0.0183908	0.157651	0.997	4860	tags=53%, list=26%, signal=72%
GO:0006334_NUCLEOSOME_ASSEMBLY	GO:0006334_NUCLEOSOME_ASSEMBLY		60	0.431532	1.50601	0.0184697	0.241418	1	5371	tags=50%, list=29%, signal=70%
GO:0031167_RRNA_METHYLATION	GO:0031167_RRNA_METHYLATION		6	0.816635	1.64299	0.0197628	0.149425	0.996	2182	tags=67%, list=12%, signal=76%
GO:0001172_TRANSCRIPTION,_RNA-TEMPLATED	GO:0001172_TRANSCRIPTION,_RNA-TEMPLATED		5	0.847364	1.57178	0.0202247	0.19629	1	2153	tags=80%, list=12%, signal=91%
GO:0007130_SYNAPTONEMAL_COMPLEX_ASSEMBLY	GO:0007130_SYNAPTONEMAL_COMPLEX_ASSEMBLY		6	0.800541	1.58691	0.0211864	0.191401	1	1360	tags=50%, list=7%, signal=54%
GO:0023041_NEURONAL_SIGNAL_TRANSDUCTION	GO:0023041_NEURONAL_SIGNAL_TRANSDUCTION		5	0.825207	1.57825	0.0213675	0.193903	1	1057	tags=40%, list=6%, signal=42%
GO:0040038_POLAR_BODY_EXTRUSION_AFTER_MEIOTIC_DIVISIONS	GO:0040038_POLAR_BODY_EXTRUSION_AFTER_MEIOTIC_DIVISIONS		16	0.617384	1.61338	0.0215311	0.162333	0.997	1324	tags=31%, list=7%, signal=34%
GO:0002098_TRNA_WOBBLE_URIDINE_MODIFICATION	GO:0002098_TRNA_WOBBLE_URIDINE_MODIFICATION		7	0.758131	1.60483	0.0237581	0.170963	0.998	4468	tags=100%, list=24%, signal=132%
GO:0000281_MITOTIC_CYTOKINESIS	GO:0000281_MITOTIC_CYTOKINESIS		24	0.547881	1.54595	0.025522	0.21579	1	3841	tags=54%, list=21%, signal=68%
GO:0007076_MITOTIC_CHROMOSOME_CONDENSATION	GO:0007076_MITOTIC_CHROMOSOME_CONDENSATION		7	0.766894	1.59955	0.0255864	0.17437	0.999	4020	tags=71%, list=22%, signal=91%
GO:0042274_RIBOSOMAL_SMALL_SUBUNIT_BIOGENESIS	GO:0042274_RIBOSOMAL_SMALL_SUBUNIT_BIOGENESIS		7	0.744242	1.55199	0.025641	0.219969	1	3181	tags=71%, list=17%, signal=86%
GO:0032968_POSITIVE_REGULATION_OF_TRANSCRIPTION_ELONGATION_FROM_RNA_POLYMERASE_II_PROMOTER	GO:0032968_POSITIVE_REGULATION_OF_TRANSCRIPTION_ELONGATION_FROM_RNA_POLYMERASE_II_PROMOTER		8	0.717401	1.57868	0.0276596	0.195724	1	2730	tags=63%, list=15%, signal=73%
GO:0006839_MITOCHONDRIAL_TRANSPORT	GO:0006839_MITOCHONDRIAL_TRANSPORT		28	0.525511	1.5689	0.028133	0.196311	1	2820	tags=43%, list=15%, signal=51%
GO:0006611_PROTEIN_EXPORT_FROM_NUCLEUS	GO:0006611_PROTEIN_EXPORT_FROM_NUCLEUS		5	0.820888	1.53479	0.0289855	0.21783	1	3082	tags=60%, list=17%, signal=72%
GO:0040019_POSITIVE_REGULATION_OF_EMBRYONIC_DEVELOPMENT	GO:0040019_POSITIVE_REGULATION_OF_EMBRYONIC_DEVELOPMENT		13	0.659323	1.59901	0.0292793	0.172632	1	4204	tags=62%, list=23%, signal=80%
GO:0040026_POSITIVE_REGULATION_OF_VULVAL_DEVELOPMENT	GO:0040026_POSITIVE_REGULATION_OF_VULVAL_DEVELOPMENT		27	0.521727	1.51489	0.0298507	0.234524	1	1039	tags=22%, list=6%, signal=24%
GO:0007019_MICROTUBULE_DEPOLYMERIZATION	GO:0007019_MICROTUBULE_DEPOLYMERIZATION		6	0.785915	1.55634	0.0301811	0.217353	1	2511	tags=67%, list=14%, signal=77%
GO:0032970_REGULATION_OF_ACTIN_FILAMENT-BASED_PROCESS	GO:0032970_REGULATION_OF_ACTIN_FILAMENT-BASED_PROCESS		5	0.828376	1.54334	0.0314465	0.213521	1	870	tags=60%, list=5%, signal=63%
GO:0007129_SYNAPSIS	GO:0007129_SYNAPSIS		6	0.777038	1.54102	0.0318907	0.213506	1	3992	tags=83%, list=22%, signal=106%
GO:0045167_ASYMMETRIC_PROTEIN_LOCALIZATION_INVOLVED_IN_CELL_FATE_DETERMINATION	GO:0045167_ASYMMETRIC_PROTEIN_LOCALIZATION_INVOLVED_IN_CELL_FATE_DETERMINATION		20	0.545905	1.51666	0.0329412	0.233735	1	2732	tags=40%, list=15%, signal=47%
GO:0006458_'DE_NOVO'_PROTEIN_FOLDING	GO:0006458_'DE_NOVO'_PROTEIN_FOLDING		9	0.738073	1.60897	0.032967	0.166603	0.998	4388	tags=67%, list=24%, signal=87%
GO:0007602_PHOTOTRANSDUCTION	GO:0007602_PHOTOTRANSDUCTION		10	0.681303	1.55014	0.0348837	0.218323	1	1236	tags=40%, list=7%, signal=43%
GO:0006400_TRNA_MODIFICATION	GO:0006400_TRNA_MODIFICATION		12	0.633586	1.54379	0.0352113	0.217484	1	2842	tags=42%, list=15%, signal=49%
GO:0000462_MATURATION_OF_SSU-RRNA_FROM_TRICISTRONIC_RRNA_TRANSCRIPT_(SSU-RRNA,_5.8S_RRNA,_LSU-RRNA)	GO:0000462_MATURATION_OF_SSU-RRNA_FROM_TRICISTRONIC_RRNA_TRANSCRIPT_(SSU-RRNA,_5.8S_RRNA,_LSU-RRNA)		26	0.537743	1.5421	0.0364583	0.213927	1	4085	tags=46%, list=22%, signal=59%
GO:0032543_MITOCHONDRIAL_TRANSLATION	GO:0032543_MITOCHONDRIAL_TRANSLATION		27	0.517004	1.53058	0.0371353	0.222836	1	3611	tags=48%, list=20%, signal=60%
GO:0007131_RECIPROCAL_MEIOTIC_RECOMBINATION	GO:0007131_RECIPROCAL_MEIOTIC_RECOMBINATION		9	0.700727	1.54839	0.0371901	0.216237	1	2753	tags=67%, list=15%, signal=78%
GO:0043087_REGULATION_OF_GTPASE_ACTIVITY	GO:0043087_REGULATION_OF_GTPASE_ACTIVITY		12	0.657821	1.5822	0.0372807	0.194847	1	439	tags=25%, list=2%, signal=26%
GO:0030997_REGULATION_OF_CENTRIOLE-CENTRIOLE_COHESION	GO:0030997_REGULATION_OF_CENTRIOLE-CENTRIOLE_COHESION		5	0.803489	1.50093	0.0381356	0.24429	1	1360	tags=60%, list=7%, signal=65%
GO:0009966_REGULATION_OF_SIGNAL_TRANSDUCTION	GO:0009966_REGULATION_OF_SIGNAL_TRANSDUCTION		7	0.756785	1.54087	0.0383795	0.211451	1	3041	tags=57%, list=16%, signal=68%
GO:0006265_DNA_TOPOLOGICAL_CHANGE	GO:0006265_DNA_TOPOLOGICAL_CHANGE		7	0.73732	1.52435	0.0393375	0.227303	1	2976	tags=57%, list=16%, signal=68%
GO:0000338_PROTEIN_DENEDDYLATION	GO:0000338_PROTEIN_DENEDDYLATION		6	0.765949	1.49881	0.0395833	0.243749	1	4323	tags=100%, list=23%, signal=131%
GO:0001510_RNA_METHYLATION	GO:0001510_RNA_METHYLATION		6	0.770856	1.54862	0.0406504	0.218375	1	2182	tags=67%, list=12%, signal=76%
GO:0090307_MITOTIC_SPINDLE_ASSEMBLY	GO:0090307_MITOTIC_SPINDLE_ASSEMBLY		7	0.73784	1.546	0.0419287	0.218283	1	3598	tags=43%, list=19%, signal=53%
GO:0045977_POSITIVE_REGULATION_OF_MITOTIC_CELL_CYCLE,_EMBRYONIC	GO:0045977_POSITIVE_REGULATION_OF_MITOTIC_CELL_CYCLE,_EMBRYONIC		5	0.788439	1.50506	0.0431035	0.241043	1	1962	tags=40%, list=11%, signal=45%
GO:0033365_PROTEIN_LOCALIZATION_TO_ORGANELLE	GO:0033365_PROTEIN_LOCALIZATION_TO_ORGANELLE		7	0.744356	1.54337	0.0433839	0.215905	1	174	tags=29%, list=1%, signal=29%
GO:0045292_MRNA_CIS_SPLICING,_VIA_SPLICEOSOME	GO:0045292_MRNA_CIS_SPLICING,_VIA_SPLICEOSOME		5	0.800045	1.50906	0.0447761	0.240332	1	3411	tags=80%, list=18%, signal=98%
GO:0060290_TRANSDIFFERENTIATION	GO:0060290_TRANSDIFFERENTIATION		10	0.675834	1.52639	0.044843	0.225625	1	3546	tags=60%, list=19%, signal=74%
GO:1903863_P_GRANULE_ASSEMBLY	GO:1903863_P_GRANULE_ASSEMBLY		7	0.74838	1.55265	0.0451745	0.22159	1	2528	tags=57%, list=14%, signal=66%
GO:0008285_NEGATIVE_REGULATION_OF_CELL_PROLIFERATION	GO:0008285_NEGATIVE_REGULATION_OF_CELL_PROLIFERATION		8	0.714723	1.52913	0.0455487	0.223172	1	4023	tags=50%, list=22%, signal=64%
GO:0007064_MITOTIC_SISTER_CHROMATID_COHESION	GO:0007064_MITOTIC_SISTER_CHROMATID_COHESION		12	0.623013	1.50347	0.0464602	0.242051	1	4347	tags=67%, list=24%, signal=87%

## Sheet: GFP_D7_O2_pos
NAME	GS<br> follow link to MSigDB	GS DETAILS	SIZE	ES	NES	NOM p-val	FDR q-val	FWER p-val	RANK AT MAX	LEADING EDGE
GO:0030030_CELL_PROJECTION_ORGANIZATION	GO:0030030_CELL_PROJECTION_ORGANIZATION	Details ...	20	0.79879	2.05813	0	0.00104094	0.001	1857	tags=55%, list=11%, signal=62%
GO:1905515_NON-MOTILE_CILIUM_ASSEMBLY	GO:1905515_NON-MOTILE_CILIUM_ASSEMBLY	Details ...	32	0.722746	2.03549	0	0.00208363	0.004	1857	tags=38%, list=11%, signal=42%
GO:0007218_NEUROPEPTIDE_SIGNALING_PATHWAY	GO:0007218_NEUROPEPTIDE_SIGNALING_PATHWAY	Details ...	89	0.578242	1.98371	0	0.00579265	0.017	1573	tags=33%, list=10%, signal=36%
GO:0006935_CHEMOTAXIS	GO:0006935_CHEMOTAXIS	Details ...	55	0.617436	1.93936	0	0.0163576	0.064	2059	tags=36%, list=12%, signal=41%
GO:0060271_CILIUM_ASSEMBLY	GO:0060271_CILIUM_ASSEMBLY	Details ...	42	0.635422	1.92443	0	0.0165746	0.077	2116	tags=45%, list=13%, signal=52%
GO:0008582_REGULATION_OF_SYNAPTIC_GROWTH_AT_NEUROMUSCULAR_JUNCTION	GO:0008582_REGULATION_OF_SYNAPTIC_GROWTH_AT_NEUROMUSCULAR_JUNCTION	Details ...	12	0.821089	1.86023	0	0.0458392	0.239	1868	tags=75%, list=11%, signal=85%
GO:0048791_CALCIUM_ION-REGULATED_EXOCYTOSIS_OF_NEUROTRANSMITTER	GO:0048791_CALCIUM_ION-REGULATED_EXOCYTOSIS_OF_NEUROTRANSMITTER	Details ...	13	0.799864	1.85507	0	0.0420637	0.254	1479	tags=62%, list=9%, signal=68%
GO:0017158_REGULATION_OF_CALCIUM_ION-DEPENDENT_EXOCYTOSIS	GO:0017158_REGULATION_OF_CALCIUM_ION-DEPENDENT_EXOCYTOSIS	Details ...	12	0.805047	1.83044	0.00189394	0.0555798	0.345	1298	tags=58%, list=8%, signal=63%
GO:0007188_ADENYLATE_CYCLASE-MODULATING_G-PROTEIN_COUPLED_RECEPTOR_SIGNALING_PATHWAY	GO:0007188_ADENYLATE_CYCLASE-MODULATING_G-PROTEIN_COUPLED_RECEPTOR_SIGNALING_PATHWAY	Details ...	18	0.701423	1.79123	0.00184162	0.0942936	0.558	387	tags=17%, list=2%, signal=17%
GO:0000712_RESOLUTION_OF_MEIOTIC_RECOMBINATION_INTERMEDIATES	GO:0000712_RESOLUTION_OF_MEIOTIC_RECOMBINATION_INTERMEDIATES	Details ...	12	0.778648	1.77234	0.003861	0.113875	0.676	1244	tags=25%, list=8%, signal=27%
GO:0040032_POST-EMBRYONIC_BODY_MORPHOGENESIS	GO:0040032_POST-EMBRYONIC_BODY_MORPHOGENESIS	Details ...	16	0.721527	1.74687	0.00547445	0.150194	0.807	1609	tags=31%, list=10%, signal=35%
GO:0040024_DAUER_LARVAL_DEVELOPMENT	GO:0040024_DAUER_LARVAL_DEVELOPMENT	Details ...	63	0.53409	1.73254	0	0.16793	0.862	1868	tags=29%, list=11%, signal=32%
DELAYED_PRGS	DELAYED_PRGS	Details ...	47	0.558525	1.73044	0.00511945	0.0098968	0.02	2697	tags=30%, list=16%, signal=36%
GENES_LINKED_TO_OXYGEN_SENSING	GENES_LINKED_TO_OXYGEN_SENSING_CORE_EXTENDED	Details ...	23	0.653196	1.71388	0.00560748	0.00948965	0.027	1802	tags=39%, list=11%, signal=44%
GO:0045887_POSITIVE_REGULATION_OF_SYNAPTIC_GROWTH_AT_NEUROMUSCULAR_JUNCTION	GO:0045887_POSITIVE_REGULATION_OF_SYNAPTIC_GROWTH_AT_NEUROMUSCULAR_JUNCTION	Details ...	9	0.815016	1.705	0.00554529	0.226917	0.946	1791	tags=67%, list=11%, signal=75%
GO:0045664_REGULATION_OF_NEURON_DIFFERENTIATION	GO:0045664_REGULATION_OF_NEURON_DIFFERENTIATION	Details ...	11	0.75626	1.70409	0.0094697	0.212819	0.95	1802	tags=36%, list=11%, signal=41%
GO:0043518_NEGATIVE_REGULATION_OF_DNA_DAMAGE_RESPONSE,_SIGNAL_TRANSDUCTION_BY_P53_CLASS_MEDIATOR	GO:0043518_NEGATIVE_REGULATION_OF_DNA_DAMAGE_RESPONSE,_SIGNAL_TRANSDUCTION_BY_P53_CLASS_MEDIATOR	Details ...	10	0.776291	1.69635	0.00938086	0.220175	0.961	2437	tags=60%, list=15%, signal=70%
GO:0035721_INTRACILIARY_RETROGRADE_TRANSPORT	GO:0035721_INTRACILIARY_RETROGRADE_TRANSPORT	Details ...	8	0.810292	1.68622	0.0109689	0.235567	0.971	525	tags=38%, list=3%, signal=39%
GO:0006182_CGMP_BIOSYNTHETIC_PROCESS	GO:0006182_CGMP_BIOSYNTHETIC_PROCESS	Details ...	36	0.56878	1.67197	0.00894454	0.249953	0.986	1735	tags=31%, list=11%, signal=34%
GO:0040013_NEGATIVE_REGULATION_OF_LOCOMOTION	GO:0040013_NEGATIVE_REGULATION_OF_LOCOMOTION	Details ...	8	0.805486	1.66808	0.003663	0.248277	0.994	2181	tags=63%, list=13%, signal=72%
GO:1905909_REGULATION_OF_DAUER_ENTRY	GO:1905909_REGULATION_OF_DAUER_ENTRY	Details ...	6	0.872392	1.66606	0.0104384	0.242173	0.994	2109	tags=100%, list=13%, signal=115%
GENES_LINKED_TO_CA2+_SIGNALLING	GENES_LINKED_TO_CA2+_SIGNALLING	Details ...	40	0.493739	1.4852	0.028777	0.0604831	0.212	3819	tags=33%, list=23%, signal=42%

## Sheet: GFP21_age_neg
NAME	GS<br> follow link to MSigDB	GS DETAILS	SIZE	ES	NES	NOM p-val	FDR q-val	FWER p-val	RANK AT MAX	LEADING EDGE
GO:0007218_NEUROPEPTIDE_SIGNALING_PATHWAY	GO:0007218_NEUROPEPTIDE_SIGNALING_PATHWAY	Details ...	87	-0.767468	-2.21633	0	0	0	1257	tags=49%, list=7%, signal=53%
GO:0007186_G-PROTEIN_COUPLED_RECEPTOR_SIGNALING_PATHWAY	GO:0007186_G-PROTEIN_COUPLED_RECEPTOR_SIGNALING_PATHWAY	Details ...	309	-0.666138	-2.20676	0	0	0	2550	tags=37%, list=15%, signal=43%
GENES_LINKED_TO_OXYGEN_SENSING	GENES_LINKED_TO_OXYGEN_SENSING_CORE_EXTENDED	Details ...	23	-0.90615	-2.08796	0	0	0	804	tags=74%, list=5%, signal=77%
GO:0034220_ION_TRANSMEMBRANE_TRANSPORT	GO:0034220_ION_TRANSMEMBRANE_TRANSPORT	Details ...	122	-0.675091	-1.99846	0	0	0	3158	tags=47%, list=18%, signal=57%
GO:0006813_POTASSIUM_ION_TRANSPORT	GO:0006813_POTASSIUM_ION_TRANSPORT	Details ...	39	-0.795851	-1.99067	0	0	0	1955	tags=62%, list=11%, signal=69%
GO:0007165_SIGNAL_TRANSDUCTION	GO:0007165_SIGNAL_TRANSDUCTION	Details ...	310	-0.595919	-1.96147	0	0	0	1967	tags=33%, list=11%, signal=37%
GO:0046662_REGULATION_OF_OVIPOSITION	GO:0046662_REGULATION_OF_OVIPOSITION	Details ...	42	-0.774158	-1.94653	0	0.000158351	0.001	2204	tags=55%, list=13%, signal=63%
GO:0006935_CHEMOTAXIS	GO:0006935_CHEMOTAXIS	Details ...	53	-0.73403	-1.93489	0	0.000135729	0.001	2658	tags=60%, list=15%, signal=71%
GO:0043051_REGULATION_OF_PHARYNGEAL_PUMPING	GO:0043051_REGULATION_OF_PHARYNGEAL_PUMPING	Details ...	35	-0.802186	-1.923	0	0.000509301	0.004	1469	tags=51%, list=8%, signal=56%
GO:0006937_REGULATION_OF_MUSCLE_CONTRACTION	GO:0006937_REGULATION_OF_MUSCLE_CONTRACTION	Details ...	28	-0.817059	-1.91748	0	0.000452712	0.004	2151	tags=68%, list=12%, signal=77%
GO:0007638_MECHANOSENSORY_BEHAVIOR	GO:0007638_MECHANOSENSORY_BEHAVIOR	Details ...	26	-0.816477	-1.91462	0	0.000407441	0.004	1955	tags=62%, list=11%, signal=69%
GO:0007271_SYNAPTIC_TRANSMISSION,_CHOLINERGIC	GO:0007271_SYNAPTIC_TRANSMISSION,_CHOLINERGIC	Details ...	20	-0.875049	-1.89917	0	0.000731125	0.008	986	tags=65%, list=6%, signal=69%
GO:0060271_CILIUM_ASSEMBLY	GO:0060271_CILIUM_ASSEMBLY	Details ...	42	-0.759136	-1.89822	0	0.000670198	0.008	3067	tags=64%, list=18%, signal=78%
GO:0015671_OXYGEN_TRANSPORT	GO:0015671_OXYGEN_TRANSPORT	Details ...	18	-0.870344	-1.88971	0	0.000856962	0.011	1139	tags=56%, list=7%, signal=59%
GO:0071805_POTASSIUM_ION_TRANSMEMBRANE_TRANSPORT	GO:0071805_POTASSIUM_ION_TRANSMEMBRANE_TRANSPORT	Details ...	82	-0.665757	-1.88366	0	0.000935756	0.013	1933	tags=38%, list=11%, signal=42%
GO:0034765_REGULATION_OF_ION_TRANSMEMBRANE_TRANSPORT	GO:0034765_REGULATION_OF_ION_TRANSMEMBRANE_TRANSPORT	Details ...	25	-0.795679	-1.87351	0	0.00100683	0.015	1357	tags=68%, list=8%, signal=74%
GO:1905515_NON-MOTILE_CILIUM_ASSEMBLY	GO:1905515_NON-MOTILE_CILIUM_ASSEMBLY	Details ...	31	-0.76758	-1.83136	0	0.00212731	0.034	3370	tags=81%, list=19%, signal=100%
GO:0035556_INTRACELLULAR_SIGNAL_TRANSDUCTION	GO:0035556_INTRACELLULAR_SIGNAL_TRANSDUCTION	Details ...	155	-0.593765	-1.82704	0	0.0021178	0.036	1712	tags=29%, list=10%, signal=32%
GO:0007635_CHEMOSENSORY_BEHAVIOR	GO:0007635_CHEMOSENSORY_BEHAVIOR	Details ...	38	-0.743723	-1.81127	0	0.00281606	0.049	2331	tags=55%, list=13%, signal=64%
GO:0007631_FEEDING_BEHAVIOR	GO:0007631_FEEDING_BEHAVIOR	Details ...	11	-0.906687	-1.79602	0	0.00380129	0.071	1174	tags=73%, list=7%, signal=78%
GO:0018107_PEPTIDYL-THREONINE_PHOSPHORYLATION	GO:0018107_PEPTIDYL-THREONINE_PHOSPHORYLATION	Details ...	24	-0.783364	-1.7895	0.0021978	0.0043954	0.085	2323	tags=42%, list=13%, signal=48%
GO:0006887_EXOCYTOSIS	GO:0006887_EXOCYTOSIS		24	-0.778063	-1.78659	0	0.00461619	0.093	1465	tags=42%, list=8%, signal=45%
GO:1901046_POSITIVE_REGULATION_OF_OVIPOSITION	GO:1901046_POSITIVE_REGULATION_OF_OVIPOSITION		18	-0.841519	-1.77508	0	0.00552417	0.115	1415	tags=50%, list=8%, signal=54%
GO:0006906_VESICLE_FUSION	GO:0006906_VESICLE_FUSION		27	-0.761413	-1.77308	0.00210526	0.00563438	0.123	2044	tags=44%, list=12%, signal=50%
GO:0007212_DOPAMINE_RECEPTOR_SIGNALING_PATHWAY	GO:0007212_DOPAMINE_RECEPTOR_SIGNALING_PATHWAY		14	-0.873515	-1.77241	0	0.0054411	0.123	651	tags=64%, list=4%, signal=67%
GO:0070482_RESPONSE_TO_OXYGEN_LEVELS	GO:0070482_RESPONSE_TO_OXYGEN_LEVELS		12	-0.871017	-1.73962	0	0.0108639	0.246	1346	tags=67%, list=8%, signal=72%
GO:0051260_PROTEIN_HOMOOLIGOMERIZATION	GO:0051260_PROTEIN_HOMOOLIGOMERIZATION		46	-0.673896	-1.72633	0.00456621	0.0141729	0.316	1313	tags=24%, list=8%, signal=26%
GO:0030030_CELL_PROJECTION_ORGANIZATION	GO:0030030_CELL_PROJECTION_ORGANIZATION		20	-0.777619	-1.72338	0.00204499	0.0143483	0.326	3587	tags=90%, list=21%, signal=113%
GO:0032094_RESPONSE_TO_FOOD	GO:0032094_RESPONSE_TO_FOOD		9	-0.910755	-1.7147	0	0.0161956	0.366	502	tags=67%, list=3%, signal=69%
GO:0040013_NEGATIVE_REGULATION_OF_LOCOMOTION	GO:0040013_NEGATIVE_REGULATION_OF_LOCOMOTION		8	-0.931771	-1.69918	0.00195695	0.020987	0.456	1197	tags=100%, list=7%, signal=107%
GO:0050976_DETECTION_OF_MECHANICAL_STIMULUS_INVOLVED_IN_SENSORY_PERCEPTION_OF_TOUCH	GO:0050976_DETECTION_OF_MECHANICAL_STIMULUS_INVOLVED_IN_SENSORY_PERCEPTION_OF_TOUCH		12	-0.851193	-1.69255	0.00632911	0.0229681	0.508	1955	tags=83%, list=11%, signal=94%
GO:0090325_REGULATION_OF_LOCOMOTION_INVOLVED_IN_LOCOMOTORY_BEHAVIOR	GO:0090325_REGULATION_OF_LOCOMOTION_INVOLVED_IN_LOCOMOTORY_BEHAVIOR		8	-0.921735	-1.69029	0.00197628	0.0231886	0.522	1152	tags=75%, list=7%, signal=80%
GO:0048791_CALCIUM_ION-REGULATED_EXOCYTOSIS_OF_NEUROTRANSMITTER	GO:0048791_CALCIUM_ION-REGULATED_EXOCYTOSIS_OF_NEUROTRANSMITTER		13	-0.851507	-1.68537	0	0.0249707	0.557	1810	tags=69%, list=10%, signal=77%
GO:0030517_NEGATIVE_REGULATION_OF_AXON_EXTENSION	GO:0030517_NEGATIVE_REGULATION_OF_AXON_EXTENSION		5	-0.977198	-1.67728	0	0.0282375	0.607	80	tags=40%, list=0%, signal=40%
GO:0007606_SENSORY_PERCEPTION_OF_CHEMICAL_STIMULUS	GO:0007606_SENSORY_PERCEPTION_OF_CHEMICAL_STIMULUS		89	-0.581935	-1.67005	0	0.0322793	0.671	2287	tags=20%, list=13%, signal=23%
GO:0035725_SODIUM_ION_TRANSMEMBRANE_TRANSPORT	GO:0035725_SODIUM_ION_TRANSMEMBRANE_TRANSPORT		46	-0.641744	-1.66586	0.004662	0.0336817	0.697	1955	tags=33%, list=11%, signal=37%
GO:0017158_REGULATION_OF_CALCIUM_ION-DEPENDENT_EXOCYTOSIS	GO:0017158_REGULATION_OF_CALCIUM_ION-DEPENDENT_EXOCYTOSIS		12	-0.843229	-1.66192	0.00994036	0.0350161	0.719	1810	tags=67%, list=10%, signal=74%
GO:0097402_NEUROBLAST_MIGRATION	GO:0097402_NEUROBLAST_MIGRATION		14	-0.794197	-1.65261	0.00801603	0.0412833	0.781	2180	tags=64%, list=13%, signal=73%
GO:0006811_ION_TRANSPORT	GO:0006811_ION_TRANSPORT		331	-0.498284	-1.65102	0	0.0411089	0.787	2417	tags=31%, list=14%, signal=35%
GO:0007200_PHOSPHOLIPASE_C-ACTIVATING_G-PROTEIN_COUPLED_RECEPTOR_SIGNALING_PATHWAY	GO:0007200_PHOSPHOLIPASE_C-ACTIVATING_G-PROTEIN_COUPLED_RECEPTOR_SIGNALING_PATHWAY		9	-0.895011	-1.65017	0.0021978	0.0407396	0.792	937	tags=78%, list=5%, signal=82%
GO:0042073_INTRACILIARY_TRANSPORT	GO:0042073_INTRACILIARY_TRANSPORT		14	-0.783342	-1.6453	0.010917	0.043525	0.823	3317	tags=79%, list=19%, signal=97%
GO:0035545_DETERMINATION_OF_LEFT/RIGHT_ASYMMETRY_IN_NERVOUS_SYSTEM	GO:0035545_DETERMINATION_OF_LEFT/RIGHT_ASYMMETRY_IN_NERVOUS_SYSTEM		11	-0.837793	-1.64481	0.00409836	0.0428986	0.828	1000	tags=55%, list=6%, signal=58%
GO:0016079_SYNAPTIC_VESICLE_EXOCYTOSIS	GO:0016079_SYNAPTIC_VESICLE_EXOCYTOSIS		6	-0.932128	-1.64191	0.00206612	0.0441899	0.841	731	tags=67%, list=4%, signal=70%
GO:0050920_REGULATION_OF_CHEMOTAXIS	GO:0050920_REGULATION_OF_CHEMOTAXIS		15	-0.774913	-1.64089	0.00849257	0.0439422	0.849	756	tags=33%, list=4%, signal=35%
GO:0007626_LOCOMOTORY_BEHAVIOR	GO:0007626_LOCOMOTORY_BEHAVIOR		19	-0.763377	-1.64058	0.00434783	0.0431703	0.851	1855	tags=53%, list=11%, signal=59%
GO:0006836_NEUROTRANSMITTER_TRANSPORT	GO:0006836_NEUROTRANSMITTER_TRANSPORT		29	-0.688533	-1.63941	0.0179775	0.0431547	0.859	2002	tags=41%, list=11%, signal=47%
GO:0007610_BEHAVIOR	GO:0007610_BEHAVIOR		13	-0.807918	-1.63852	0.00625	0.0427928	0.865	701	tags=38%, list=4%, signal=40%
GO:0040012_REGULATION_OF_LOCOMOTION	GO:0040012_REGULATION_OF_LOCOMOTION		37	-0.659059	-1.63399	0.00666667	0.045361	0.885	1516	tags=46%, list=9%, signal=50%
GO:0007210_SEROTONIN_RECEPTOR_SIGNALING_PATHWAY	GO:0007210_SEROTONIN_RECEPTOR_SIGNALING_PATHWAY		7	-0.900151	-1.62278	0.00617284	0.0548573	0.931	1358	tags=86%, list=8%, signal=93%
GO:0043547_POSITIVE_REGULATION_OF_GTPASE_ACTIVITY	GO:0043547_POSITIVE_REGULATION_OF_GTPASE_ACTIVITY		108	-0.560572	-1.6225	0	0.0541067	0.931	2476	tags=37%, list=14%, signal=43%
GO:0042391_REGULATION_OF_MEMBRANE_POTENTIAL	GO:0042391_REGULATION_OF_MEMBRANE_POTENTIAL		16	-0.737761	-1.62097	0.0210526	0.0544312	0.933	2824	tags=50%, list=16%, signal=60%
GO:0001966_THIGMOTAXIS	GO:0001966_THIGMOTAXIS		8	-0.901327	-1.6192	0.00616016	0.0548134	0.937	1507	tags=75%, list=9%, signal=82%
GO:0010446_RESPONSE_TO_ALKALINE_PH	GO:0010446_RESPONSE_TO_ALKALINE_PH		8	-0.891059	-1.6164	0.00811359	0.056273	0.942	1051	tags=63%, list=6%, signal=66%
GO:0009612_RESPONSE_TO_MECHANICAL_STIMULUS	GO:0009612_RESPONSE_TO_MECHANICAL_STIMULUS		16	-0.775889	-1.61372	0.00877193	0.0576263	0.951	1955	tags=75%, list=11%, signal=84%
GO:0006120_MITOCHONDRIAL_ELECTRON_TRANSPORT,_NADH_TO_UBIQUINONE	GO:0006120_MITOCHONDRIAL_ELECTRON_TRANSPORT,_NADH_TO_UBIQUINONE		17	-0.770984	-1.61329	0.0148936	0.0568582	0.951	1752	tags=41%, list=10%, signal=46%
GO:0034613_CELLULAR_PROTEIN_LOCALIZATION	GO:0034613_CELLULAR_PROTEIN_LOCALIZATION		9	-0.849421	-1.60877	0.00845666	0.0605319	0.964	623	tags=33%, list=4%, signal=35%
GO:0014057_POSITIVE_REGULATION_OF_ACETYLCHOLINE_SECRETION,_NEUROTRANSMISSION	GO:0014057_POSITIVE_REGULATION_OF_ACETYLCHOLINE_SECRETION,_NEUROTRANSMISSION		11	-0.847896	-1.60678	0.00798403	0.0609083	0.964	1469	tags=55%, list=8%, signal=60%
GO:1905789_POSITIVE_REGULATION_OF_DETECTION_OF_MECHANICAL_STIMULUS_INVOLVED_IN_SENSORY_PERCEPTION_OF_TOUCH	GO:1905789_POSITIVE_REGULATION_OF_DETECTION_OF_MECHANICAL_STIMULUS_INVOLVED_IN_SENSORY_PERCEPTION_OF_TOUCH		10	-0.842833	-1.60578	0.00831601	0.0608701	0.966	1955	tags=80%, list=11%, signal=90%
GO:0061065_REGULATION_OF_DAUER_LARVAL_DEVELOPMENT	GO:0061065_REGULATION_OF_DAUER_LARVAL_DEVELOPMENT		14	-0.800432	-1.60425	0.00801603	0.0609678	0.967	2658	tags=79%, list=15%, signal=93%
GO:1905792_POSITIVE_REGULATION_OF_MECHANOSENSORY_BEHAVIOR	GO:1905792_POSITIVE_REGULATION_OF_MECHANOSENSORY_BEHAVIOR		10	-0.842833	-1.6035	0.00638298	0.0607403	0.967	1955	tags=80%, list=11%, signal=90%
GO:0043058_REGULATION_OF_BACKWARD_LOCOMOTION	GO:0043058_REGULATION_OF_BACKWARD_LOCOMOTION		8	-0.881558	-1.6008	0.0138889	0.0621176	0.97	1682	tags=75%, list=10%, signal=83%
GO:0048488_SYNAPTIC_VESICLE_ENDOCYTOSIS	GO:0048488_SYNAPTIC_VESICLE_ENDOCYTOSIS		9	-0.844568	-1.59853	0.0227743	0.0632267	0.971	1682	tags=44%, list=10%, signal=49%
GO:0016311_DEPHOSPHORYLATION	GO:0016311_DEPHOSPHORYLATION		109	-0.545156	-1.5947	0.00235849	0.0663887	0.974	1758	tags=17%, list=10%, signal=19%
GO:2000292_REGULATION_OF_DEFECATION	GO:2000292_REGULATION_OF_DEFECATION		7	-0.905358	-1.59423	0.0060241	0.065663	0.974	959	tags=86%, list=6%, signal=91%
GO:0006470_PROTEIN_DEPHOSPHORYLATION	GO:0006470_PROTEIN_DEPHOSPHORYLATION		126	-0.534974	-1.5881	0	0.0706518	0.985	1760	tags=16%, list=10%, signal=18%
GO:0030421_DEFECATION	GO:0030421_DEFECATION		28	-0.677768	-1.58485	0.00888889	0.0731876	0.988	780	tags=29%, list=4%, signal=30%
GO:0009190_CYCLIC_NUCLEOTIDE_BIOSYNTHETIC_PROCESS	GO:0009190_CYCLIC_NUCLEOTIDE_BIOSYNTHETIC_PROCESS		33	-0.650461	-1.58406	0.0186916	0.0728981	0.988	959	tags=33%, list=6%, signal=35%
GO:0006182_CGMP_BIOSYNTHETIC_PROCESS	GO:0006182_CGMP_BIOSYNTHETIC_PROCESS		32	-0.654732	-1.58124	0.0177384	0.074743	0.991	959	tags=34%, list=6%, signal=36%
GO:1990834_RESPONSE_TO_ODORANT	GO:1990834_RESPONSE_TO_ODORANT		13	-0.77812	-1.58111	0.027897	0.0737905	0.992	2391	tags=54%, list=14%, signal=62%
GO:0090326_POSITIVE_REGULATION_OF_LOCOMOTION_INVOLVED_IN_LOCOMOTORY_BEHAVIOR	GO:0090326_POSITIVE_REGULATION_OF_LOCOMOTION_INVOLVED_IN_LOCOMOTORY_BEHAVIOR		10	-0.811928	-1.57625	0.0123457	0.0782219	0.995	1152	tags=40%, list=7%, signal=43%
GO:2000114_REGULATION_OF_ESTABLISHMENT_OF_CELL_POLARITY	GO:2000114_REGULATION_OF_ESTABLISHMENT_OF_CELL_POLARITY		7	-0.86337	-1.57316	0.0127119	0.0805626	0.995	593	tags=43%, list=3%, signal=44%
GO:0007602_PHOTOTRANSDUCTION	GO:0007602_PHOTOTRANSDUCTION		10	-0.81883	-1.56993	0.0214592	0.0837475	0.996	2824	tags=80%, list=16%, signal=95%
GO:0071244_CELLULAR_RESPONSE_TO_CARBON_DIOXIDE	GO:0071244_CELLULAR_RESPONSE_TO_CARBON_DIOXIDE		6	-0.904536	-1.56632	0.00657895	0.0869807	0.999	877	tags=83%, list=5%, signal=88%
GO:0090038_NEGATIVE_REGULATION_OF_PROTEIN_KINASE_C_SIGNALING	GO:0090038_NEGATIVE_REGULATION_OF_PROTEIN_KINASE_C_SIGNALING		7	-0.86337	-1.56105	0.0142566	0.0925142	0.999	593	tags=43%, list=3%, signal=44%
GO:0010877_LIPID_TRANSPORT_INVOLVED_IN_LIPID_STORAGE	GO:0010877_LIPID_TRANSPORT_INVOLVED_IN_LIPID_STORAGE		7	-0.891835	-1.5608	0.0140845	0.0916001	0.999	632	tags=43%, list=4%, signal=44%
GO:0043052_THERMOTAXIS	GO:0043052_THERMOTAXIS		10	-0.801189	-1.55947	0.0180723	0.0921389	0.999	1469	tags=50%, list=8%, signal=55%
GO:0061096_NEGATIVE_REGULATION_OF_TURNING_BEHAVIOR_INVOLVED_IN_MATING	GO:0061096_NEGATIVE_REGULATION_OF_TURNING_BEHAVIOR_INVOLVED_IN_MATING		7	-0.87997	-1.55778	0.0164948	0.0930941	1	1868	tags=86%, list=11%, signal=96%
GO:0035418_PROTEIN_LOCALIZATION_TO_SYNAPSE	GO:0035418_PROTEIN_LOCALIZATION_TO_SYNAPSE		11	-0.801107	-1.55684	0.026971	0.0929254	1	1993	tags=64%, list=11%, signal=72%
GO:1902476_CHLORIDE_TRANSMEMBRANE_TRANSPORT	GO:1902476_CHLORIDE_TRANSMEMBRANE_TRANSPORT		54	-0.578493	-1.55307	0.00904977	0.0966353	1	1750	tags=30%, list=10%, signal=33%
GO:0008582_REGULATION_OF_SYNAPTIC_GROWTH_AT_NEUROMUSCULAR_JUNCTION	GO:0008582_REGULATION_OF_SYNAPTIC_GROWTH_AT_NEUROMUSCULAR_JUNCTION		12	-0.79303	-1.55266	0.0196078	0.0961058	1	2339	tags=58%, list=13%, signal=67%
GO:1903998_REGULATION_OF_EATING_BEHAVIOR	GO:1903998_REGULATION_OF_EATING_BEHAVIOR		9	-0.834281	-1.55199	0.0196507	0.0959958	1	1312	tags=67%, list=8%, signal=72%
GO:1904731_POSITIVE_REGULATION_OF_INTESTINAL_LIPID_ABSORPTION	GO:1904731_POSITIVE_REGULATION_OF_INTESTINAL_LIPID_ABSORPTION		5	-0.919476	-1.55147	0.0198807	0.0955211	1	632	tags=60%, list=4%, signal=62%
GO:0050804_MODULATION_OF_CHEMICAL_SYNAPTIC_TRANSMISSION	GO:0050804_MODULATION_OF_CHEMICAL_SYNAPTIC_TRANSMISSION		5	-0.926702	-1.55137	0.016129	0.0944527	1	880	tags=40%, list=5%, signal=42%
GO:2000294_POSITIVE_REGULATION_OF_DEFECATION	GO:2000294_POSITIVE_REGULATION_OF_DEFECATION		10	-0.81614	-1.54925	0.0456432	0.0959471	1	1019	tags=50%, list=6%, signal=53%
GO:0030516_REGULATION_OF_AXON_EXTENSION	GO:0030516_REGULATION_OF_AXON_EXTENSION		11	-0.814525	-1.5484	0.01	0.0959602	1	3088	tags=82%, list=18%, signal=99%
GO:0061067_NEGATIVE_REGULATION_OF_DAUER_LARVAL_DEVELOPMENT	GO:0061067_NEGATIVE_REGULATION_OF_DAUER_LARVAL_DEVELOPMENT		12	-0.792351	-1.54736	0.0375276	0.096089	1	3197	tags=92%, list=18%, signal=112%
GO:0007268_CHEMICAL_SYNAPTIC_TRANSMISSION	GO:0007268_CHEMICAL_SYNAPTIC_TRANSMISSION		21	-0.693836	-1.54648	0.0241228	0.0960403	1	731	tags=33%, list=4%, signal=35%
GO:0006897_ENDOCYTOSIS	GO:0006897_ENDOCYTOSIS		36	-0.631509	-1.54545	0.0275424	0.0961571	1	1723	tags=36%, list=10%, signal=40%
GO:0051438_REGULATION_OF_UBIQUITIN-PROTEIN_TRANSFERASE_ACTIVITY	GO:0051438_REGULATION_OF_UBIQUITIN-PROTEIN_TRANSFERASE_ACTIVITY		10	-0.791561	-1.54399	0.0218688	0.0969501	1	227	tags=10%, list=1%, signal=10%
GO:0072488_AMMONIUM_TRANSMEMBRANE_TRANSPORT	GO:0072488_AMMONIUM_TRANSMEMBRANE_TRANSPORT		14	-0.762505	-1.54274	0.0162272	0.0972731	1	2237	tags=57%, list=13%, signal=66%
GO:0007188_ADENYLATE_CYCLASE-MODULATING_G-PROTEIN_COUPLED_RECEPTOR_SIGNALING_PATHWAY	GO:0007188_ADENYLATE_CYCLASE-MODULATING_G-PROTEIN_COUPLED_RECEPTOR_SIGNALING_PATHWAY		18	-0.725879	-1.54234	0.0408602	0.0965792	1	2522	tags=56%, list=14%, signal=65%
GO:0007416_SYNAPSE_ASSEMBLY	GO:0007416_SYNAPSE_ASSEMBLY		8	-0.857381	-1.54038	0.0147992	0.0980136	1	1992	tags=63%, list=11%, signal=71%
GO:0065009_REGULATION_OF_MOLECULAR_FUNCTION	GO:0065009_REGULATION_OF_MOLECULAR_FUNCTION		5	-0.944739	-1.53921	0.00408163	0.0985139	1	869	tags=80%, list=5%, signal=84%
GO:0050808_SYNAPSE_ORGANIZATION	GO:0050808_SYNAPSE_ORGANIZATION		8	-0.831277	-1.53836	0.0364807	0.0985524	1	1993	tags=75%, list=11%, signal=85%
GO:0006821_CHLORIDE_TRANSPORT	GO:0006821_CHLORIDE_TRANSPORT		47	-0.593928	-1.53171	0.0150862	0.106072	1	1750	tags=32%, list=10%, signal=35%
GO:0051965_POSITIVE_REGULATION_OF_SYNAPSE_ASSEMBLY	GO:0051965_POSITIVE_REGULATION_OF_SYNAPSE_ASSEMBLY		5	-0.921798	-1.53071	0.00782779	0.106563	1	121	tags=40%, list=1%, signal=40%
GO:0015701_BICARBONATE_TRANSPORT	GO:0015701_BICARBONATE_TRANSPORT		10	-0.791134	-1.52655	0.0398406	0.111097	1	2030	tags=30%, list=12%, signal=34%
GO:1903745_NEGATIVE_REGULATION_OF_PHARYNGEAL_PUMPING	GO:1903745_NEGATIVE_REGULATION_OF_PHARYNGEAL_PUMPING		6	-0.904536	-1.52391	0.01222	0.113691	1	877	tags=83%, list=5%, signal=88%
GO:1990504_DENSE_CORE_GRANULE_EXOCYTOSIS	GO:1990504_DENSE_CORE_GRANULE_EXOCYTOSIS		5	-0.915843	-1.52229	0.0100402	0.114756	1	1192	tags=80%, list=7%, signal=86%
GO:1900194_NEGATIVE_REGULATION_OF_OOCYTE_MATURATION	GO:1900194_NEGATIVE_REGULATION_OF_OOCYTE_MATURATION		5	-0.903125	-1.52206	0.0216963	0.113967	1	554	tags=60%, list=3%, signal=62%
GO:0045165_CELL_FATE_COMMITMENT	GO:0045165_CELL_FATE_COMMITMENT		8	-0.826405	-1.51587	0.0460922	0.121835	1	1385	tags=50%, list=8%, signal=54%
GO:0046928_REGULATION_OF_NEUROTRANSMITTER_SECRETION	GO:0046928_REGULATION_OF_NEUROTRANSMITTER_SECRETION		5	-0.926962	-1.51531	0.00567108	0.121512	1	880	tags=80%, list=5%, signal=84%
GO:0050913_SENSORY_PERCEPTION_OF_BITTER_TASTE	GO:0050913_SENSORY_PERCEPTION_OF_BITTER_TASTE		9	-0.812436	-1.51419	0.0254777	0.121895	1	2331	tags=67%, list=13%, signal=77%
GO:0032228_REGULATION_OF_SYNAPTIC_TRANSMISSION,_GABAERGIC	GO:0032228_REGULATION_OF_SYNAPTIC_TRANSMISSION,_GABAERGIC		8	-0.835761	-1.51382	0.0271399	0.121323	1	428	tags=50%, list=2%, signal=51%
GO:0097475_MOTOR_NEURON_MIGRATION	GO:0097475_MOTOR_NEURON_MIGRATION		10	-0.792098	-1.50986	0.0309278	0.125705	1	2180	tags=60%, list=13%, signal=69%
GO:0098664_G-PROTEIN_COUPLED_SEROTONIN_RECEPTOR_SIGNALING_PATHWAY	GO:0098664_G-PROTEIN_COUPLED_SEROTONIN_RECEPTOR_SIGNALING_PATHWAY		5	-0.89922	-1.50808	0.0333988	0.127089	1	1358	tags=80%, list=8%, signal=87%
GO:0040040_THERMOSENSORY_BEHAVIOR	GO:0040040_THERMOSENSORY_BEHAVIOR		11	-0.789084	-1.50233	0.0397614	0.134698	1	2824	tags=55%, list=16%, signal=65%
GO:0070588_CALCIUM_ION_TRANSMEMBRANE_TRANSPORT	GO:0070588_CALCIUM_ION_TRANSMEMBRANE_TRANSPORT		37	-0.609876	-1.50072	0.0296804	0.135675	1	2252	tags=46%, list=13%, signal=53%
GO:0008277_REGULATION_OF_G-PROTEIN_COUPLED_RECEPTOR_PROTEIN_SIGNALING_PATHWAY	GO:0008277_REGULATION_OF_G-PROTEIN_COUPLED_RECEPTOR_PROTEIN_SIGNALING_PATHWAY		5	-0.903187	-1.49997	0.0122699	0.135468	1	1692	tags=100%, list=10%, signal=111%
GO:0030827_NEGATIVE_REGULATION_OF_CGMP_BIOSYNTHETIC_PROCESS	GO:0030827_NEGATIVE_REGULATION_OF_CGMP_BIOSYNTHETIC_PROCESS		5	-0.89364	-1.49888	0.0399202	0.135806	1	1051	tags=80%, list=6%, signal=85%
GO:0022900_ELECTRON_TRANSPORT_CHAIN	GO:0022900_ELECTRON_TRANSPORT_CHAIN		8	-0.83772	-1.48997	0.0395833	0.149199	1	400	tags=25%, list=2%, signal=26%
GO:0008344_ADULT_LOCOMOTORY_BEHAVIOR	GO:0008344_ADULT_LOCOMOTORY_BEHAVIOR		8	-0.798473	-1.48711	0.0465587	0.152768	1	2922	tags=50%, list=17%, signal=60%
GO:0045944_POSITIVE_REGULATION_OF_TRANSCRIPTION_FROM_RNA_POLYMERASE_II_PROMOTER	GO:0045944_POSITIVE_REGULATION_OF_TRANSCRIPTION_FROM_RNA_POLYMERASE_II_PROMOTER		150	-0.489699	-1.4857	0	0.152425	1	2886	tags=33%, list=17%, signal=39%
GO:0040039_INDUCTIVE_CELL_MIGRATION	GO:0040039_INDUCTIVE_CELL_MIGRATION		14	-0.726935	-1.485	0.0441177	0.150875	1	8	tags=7%, list=0%, signal=7%
GO:0008306_ASSOCIATIVE_LEARNING	GO:0008306_ASSOCIATIVE_LEARNING		12	-0.765816	-1.48256	0.0481928	0.153641	1	1315	tags=25%, list=8%, signal=27%
GO:0040017_POSITIVE_REGULATION_OF_LOCOMOTION	GO:0040017_POSITIVE_REGULATION_OF_LOCOMOTION		47	-0.578125	-1.48112	0.0333333	0.153575	1	1922	tags=45%, list=11%, signal=50%
GO:0008355_OLFACTORY_LEARNING	GO:0008355_OLFACTORY_LEARNING		19	-0.684995	-1.47858	0.040404	0.156378	1	336	tags=21%, list=2%, signal=21%
GO:0030431_SLEEP	GO:0030431_SLEEP		8	-0.794785	-1.4764	0.0467836	0.15855	1	959	tags=38%, list=6%, signal=40%
GO:1905910_NEGATIVE_REGULATION_OF_DAUER_ENTRY	GO:1905910_NEGATIVE_REGULATION_OF_DAUER_ENTRY		8	-0.796664	-1.47564	0.0346939	0.157228	1	2951	tags=75%, list=17%, signal=90%
GO:0048681_NEGATIVE_REGULATION_OF_AXON_REGENERATION	GO:0048681_NEGATIVE_REGULATION_OF_AXON_REGENERATION		6	-0.843098	-1.47547	0.0458015	0.156207	1	1064	tags=50%, list=6%, signal=53%
GO:0019722_CALCIUM-MEDIATED_SIGNALING	GO:0019722_CALCIUM-MEDIATED_SIGNALING		7	-0.839081	-1.47342	0.0408163	0.158326	1	119	tags=43%, list=1%, signal=43%
GO:1905485_POSITIVE_REGULATION_OF_MOTOR_NEURON_MIGRATION	GO:1905485_POSITIVE_REGULATION_OF_MOTOR_NEURON_MIGRATION		10	-0.784854	-1.47282	0.0412371	0.157972	1	3356	tags=80%, list=19%, signal=99%
GO:0050896_RESPONSE_TO_STIMULUS	GO:0050896_RESPONSE_TO_STIMULUS		12	-0.749252	-1.4698	0.0494624	0.160581	1	2658	tags=50%, list=15%, signal=59%
GO:0040011_LOCOMOTION	GO:0040011_LOCOMOTION		89	-0.522691	-1.46939	0.0129199	0.160004	1	1887	tags=37%, list=11%, signal=41%
GO:1904937_SENSORY_NEURON_MIGRATION	GO:1904937_SENSORY_NEURON_MIGRATION		7	-0.826638	-1.46824	0.0360721	0.160612	1	1142	tags=57%, list=7%, signal=61%
GO:0007178_TRANSMEMBRANE_RECEPTOR_PROTEIN_SERINE/THREONINE_KINASE_SIGNALING_PATHWAY	GO:0007178_TRANSMEMBRANE_RECEPTOR_PROTEIN_SERINE/THREONINE_KINASE_SIGNALING_PATHWAY		5	-0.875892	-1.46676	0.0424242	0.161805	1	1809	tags=60%, list=10%, signal=67%
GO:0016310_PHOSPHORYLATION	GO:0016310_PHOSPHORYLATION		291	-0.436571	-1.45125	0	0.185558	1	2555	tags=27%, list=15%, signal=31%
GO:0042048_OLFACTORY_BEHAVIOR	GO:0042048_OLFACTORY_BEHAVIOR		83	-0.516165	-1.4509	0.00990099	0.1833	1	2824	tags=24%, list=16%, signal=29%
GO:0007399_NERVOUS_SYSTEM_DEVELOPMENT	GO:0007399_NERVOUS_SYSTEM_DEVELOPMENT		75	-0.517247	-1.44957	0.0217918	0.184375	1	1662	tags=33%, list=10%, signal=37%
GO:0040027_NEGATIVE_REGULATION_OF_VULVAL_DEVELOPMENT	GO:0040027_NEGATIVE_REGULATION_OF_VULVAL_DEVELOPMENT		32	-0.600347	-1.44362	0.0485232	0.18742	1	2314	tags=34%, list=13%, signal=40%
GO:0035335_PEPTIDYL-TYROSINE_DEPHOSPHORYLATION	GO:0035335_PEPTIDYL-TYROSINE_DEPHOSPHORYLATION		82	-0.514041	-1.43991	0.0172414	0.19074	1	2332	tags=18%, list=13%, signal=21%
GO:0018105_PEPTIDYL-SERINE_PHOSPHORYLATION	GO:0018105_PEPTIDYL-SERINE_PHOSPHORYLATION		95	-0.494589	-1.43496	0.0238663	0.193761	1	2406	tags=22%, list=14%, signal=26%

## Sheet: GFP21_age_pos
NAME	GS<br> follow link to MSigDB	GS DETAILS	SIZE	ES	NES	NOM p-val	FDR q-val	FWER p-val	RANK AT MAX	LEADING EDGE
GO:0006412_TRANSLATION	GO:0006412_TRANSLATION	Details ...	194	0.844681	2.48739	0	0	0	1669	tags=57%, list=10%, signal=62%
GO:0042254_RIBOSOME_BIOGENESIS	GO:0042254_RIBOSOME_BIOGENESIS	Details ...	40	0.837214	1.99981	0	0	0	1885	tags=68%, list=11%, signal=76%
GO:0002181_CYTOPLASMIC_TRANSLATION	GO:0002181_CYTOPLASMIC_TRANSLATION	Details ...	23	0.903433	1.94392	0	0.00034759	0.001	839	tags=78%, list=5%, signal=82%
GO:0006364_RRNA_PROCESSING	GO:0006364_RRNA_PROCESSING	Details ...	57	0.768724	1.93597	0	0.000511182	0.002	2632	tags=63%, list=15%, signal=74%
GO:0002064_EPITHELIAL_CELL_DEVELOPMENT	GO:0002064_EPITHELIAL_CELL_DEVELOPMENT	Details ...	22	0.893267	1.92783	0	0.000603993	0.003	229	tags=32%, list=1%, signal=32%
GO:0006457_PROTEIN_FOLDING	GO:0006457_PROTEIN_FOLDING	Details ...	74	0.724824	1.90492	0	0.000841619	0.005	2134	tags=38%, list=12%, signal=43%
GO:0006414_TRANSLATIONAL_ELONGATION	GO:0006414_TRANSLATIONAL_ELONGATION	Details ...	19	0.910284	1.88712	0	0.00143824	0.009	875	tags=58%, list=5%, signal=61%
GO:0000027_RIBOSOMAL_LARGE_SUBUNIT_ASSEMBLY	GO:0000027_RIBOSOMAL_LARGE_SUBUNIT_ASSEMBLY	Details ...	23	0.862803	1.84771	0.00182482	0.00300408	0.022	1802	tags=74%, list=10%, signal=82%
GO:0045454_CELL_REDOX_HOMEOSTASIS	GO:0045454_CELL_REDOX_HOMEOSTASIS	Details ...	57	0.740282	1.8395	0	0.00299621	0.025	1613	tags=33%, list=9%, signal=37%
GO:0042335_CUTICLE_DEVELOPMENT	GO:0042335_CUTICLE_DEVELOPMENT	Details ...	16	0.899745	1.83063	0	0.00311311	0.029	229	tags=25%, list=1%, signal=25%
GO:0045087_INNATE_IMMUNE_RESPONSE	GO:0045087_INNATE_IMMUNE_RESPONSE	Details ...	231	0.580308	1.75238	0	0.0188568	0.187	3191	tags=41%, list=18%, signal=49%
GO:0042273_RIBOSOMAL_LARGE_SUBUNIT_BIOGENESIS	GO:0042273_RIBOSOMAL_LARGE_SUBUNIT_BIOGENESIS	Details ...	13	0.908727	1.75021	0	0.0176205	0.19	1578	tags=92%, list=9%, signal=101%
GO:0006418_TRNA_AMINOACYLATION_FOR_PROTEIN_TRANSLATION	GO:0006418_TRNA_AMINOACYLATION_FOR_PROTEIN_TRANSLATION	Details ...	27	0.783106	1.7437	0	0.019152	0.221	1240	tags=41%, list=7%, signal=44%
GENES_LINKED_TO_TRANSLATION	GENES_LINKED_TO_TRANSLATION	Details ...	35	0.747686	1.74292	0.00175131	0.003325	0.005	2606	tags=57%, list=15%, signal=67%
GO:0000462_MATURATION_OF_SSU-RRNA_FROM_TRICISTRONIC_RRNA_TRANSCRIPT_(SSU-RRNA,_5.8S_RRNA,_LSU-RRNA)	GO:0000462_MATURATION_OF_SSU-RRNA_FROM_TRICISTRONIC_RRNA_TRANSCRIPT_(SSU-RRNA,_5.8S_RRNA,_LSU-RRNA)	Details ...	26	0.783642	1.72468	0.00182482	0.0272842	0.318	2627	tags=65%, list=15%, signal=77%
GO:0006633_FATTY_ACID_BIOSYNTHETIC_PROCESS	GO:0006633_FATTY_ACID_BIOSYNTHETIC_PROCESS	Details ...	32	0.752203	1.71274	0	0.0320146	0.384	1491	tags=28%, list=9%, signal=31%
GO:0000028_RIBOSOMAL_SMALL_SUBUNIT_ASSEMBLY	GO:0000028_RIBOSOMAL_SMALL_SUBUNIT_ASSEMBLY	Details ...	13	0.89509	1.71125	0.00192678	0.0312102	0.394	537	tags=62%, list=3%, signal=63%
GO:0000470_MATURATION_OF_LSU-RRNA	GO:0000470_MATURATION_OF_LSU-RRNA	Details ...	14	0.841249	1.68393	0.0138889	0.0498342	0.572	2149	tags=86%, list=12%, signal=98%
GO:0010501_RNA_SECONDARY_STRUCTURE_UNWINDING	GO:0010501_RNA_SECONDARY_STRUCTURE_UNWINDING	Details ...	34	0.716721	1.66727	0.0037037	0.0675513	0.688	3126	tags=53%, list=18%, signal=64%
GO:0019915_LIPID_STORAGE	GO:0019915_LIPID_STORAGE	Details ...	21	0.780225	1.65767	0.00185185	0.077646	0.767	2451	tags=43%, list=14%, signal=50%
ELONGATION_FACTORS	ELONGATION_FACTORS	Details ...	7	0.950095	1.65633	0.0019084	0.00647143	0.023	875	tags=100%, list=5%, signal=105%
GO:0000281_MITOTIC_CYTOKINESIS	GO:0000281_MITOTIC_CYTOKINESIS	Details ...	23	0.75251	1.63685	0.00193424	0.106451	0.882	939	tags=35%, list=5%, signal=37%
GO:0034976_RESPONSE_TO_ENDOPLASMIC_RETICULUM_STRESS	GO:0034976_RESPONSE_TO_ENDOPLASMIC_RETICULUM_STRESS		12	0.85083	1.63223	0.0114723	0.111478	0.906	843	tags=33%, list=5%, signal=35%
GO:0030968_ENDOPLASMIC_RETICULUM_UNFOLDED_PROTEIN_RESPONSE	GO:0030968_ENDOPLASMIC_RETICULUM_UNFOLDED_PROTEIN_RESPONSE		46	0.672045	1.6314	0.00707965	0.107754	0.908	2106	tags=35%, list=12%, signal=39%
GO:0006413_TRANSLATIONAL_INITIATION	GO:0006413_TRANSLATIONAL_INITIATION		36	0.692935	1.61119	0.00733945	0.146697	0.964	2606	tags=50%, list=15%, signal=59%
GO:0006694_STEROID_BIOSYNTHETIC_PROCESS	GO:0006694_STEROID_BIOSYNTHETIC_PROCESS		12	0.845562	1.60509	0.0094518	0.155902	0.976	1399	tags=50%, list=8%, signal=54%
GO:0006631_FATTY_ACID_METABOLIC_PROCESS	GO:0006631_FATTY_ACID_METABOLIC_PROCESS		37	0.669807	1.5971	0.0183824	0.171512	0.986	2254	tags=38%, list=13%, signal=43%
GO:1990170_STRESS_RESPONSE_TO_CADMIUM_ION	GO:1990170_STRESS_RESPONSE_TO_CADMIUM_ION		7	0.911483	1.58802	0.0118577	0.190569	0.989	602	tags=43%, list=3%, signal=44%
GO:0000413_PROTEIN_PEPTIDYL-PROLYL_ISOMERIZATION	GO:0000413_PROTEIN_PEPTIDYL-PROLYL_ISOMERIZATION		28	0.707893	1.58112	0.0146252	0.205435	0.998	762	tags=18%, list=4%, signal=19%
GO:0040038_POLAR_BODY_EXTRUSION_AFTER_MEIOTIC_DIVISIONS	GO:0040038_POLAR_BODY_EXTRUSION_AFTER_MEIOTIC_DIVISIONS		16	0.784284	1.58032	0.0152381	0.200261	0.998	3156	tags=69%, list=18%, signal=84%
GO:0050832_DEFENSE_RESPONSE_TO_FUNGUS	GO:0050832_DEFENSE_RESPONSE_TO_FUNGUS		22	0.749517	1.57791	0.0155945	0.201641	0.999	1461	tags=41%, list=8%, signal=45%
GO:0055114_OXIDATION-REDUCTION_PROCESS	GO:0055114_OXIDATION-REDUCTION_PROCESS		452	0.497631	1.57408	0	0.206587	1	1964	tags=23%, list=11%, signal=25%
GO:0098869_CELLULAR_OXIDANT_DETOXIFICATION	GO:0098869_CELLULAR_OXIDANT_DETOXIFICATION		45	0.639415	1.57172	0.0207612	0.208171	1	1613	tags=27%, list=9%, signal=29%
GO:0061077_CHAPERONE-MEDIATED_PROTEIN_FOLDING	GO:0061077_CHAPERONE-MEDIATED_PROTEIN_FOLDING		18	0.755892	1.56943	0.0130597	0.209067	1	2957	tags=50%, list=17%, signal=60%
GO:0006486_PROTEIN_GLYCOSYLATION	GO:0006486_PROTEIN_GLYCOSYLATION		64	0.609291	1.56511	0.0182724	0.217681	1	910	tags=9%, list=5%, signal=10%
GO:0006879_CELLULAR_IRON_ION_HOMEOSTASIS	GO:0006879_CELLULAR_IRON_ION_HOMEOSTASIS		5	0.95453	1.56483	0.00396825	0.21244	1	207	tags=40%, list=1%, signal=40%
GO:0000463_MATURATION_OF_LSU-RRNA_FROM_TRICISTRONIC_RRNA_TRANSCRIPT_(SSU-RRNA,_5.8S_RRNA,_LSU-RRNA)	GO:0000463_MATURATION_OF_LSU-RRNA_FROM_TRICISTRONIC_RRNA_TRANSCRIPT_(SSU-RRNA,_5.8S_RRNA,_LSU-RRNA)		6	0.909738	1.55209	0.0130841	0.248416	1	1009	tags=83%, list=6%, signal=88%
GENES_LINKED_TO_OXIDATIVE_STRESS_AND_REDOX_STRESS_REGULATION	GENES_LINKED_TO_OXIDATIVE_STRESS_AND_REDOX_STRESS_REGULATION	Details ...	40	0.615697	1.47262	0.037037	0.0453584	0.205	1872	tags=38%, list=11%, signal=42%

## Sheet: GFP7_age_neg
NAME	GS<br> follow link to MSigDB	GS DETAILS	SIZE	ES	NES	NOM p-val	FDR q-val	FWER p-val	RANK AT MAX	LEADING EDGE
GO:0006935_CHEMOTAXIS	GO:0006935_CHEMOTAXIS	Details ...	56	-0.825684	-2.20262	0	0	0	1299	tags=57%, list=8%, signal=62%
GO:0007186_G-PROTEIN_COUPLED_RECEPTOR_SIGNALING_PATHWAY	GO:0007186_G-PROTEIN_COUPLED_RECEPTOR_SIGNALING_PATHWAY	Details ...	300	-0.657108	-2.1896	0	0	0	2606	tags=41%, list=15%, signal=48%
GO:0007218_NEUROPEPTIDE_SIGNALING_PATHWAY	GO:0007218_NEUROPEPTIDE_SIGNALING_PATHWAY	Details ...	92	-0.751805	-2.18875	0	0	0	1694	tags=54%, list=10%, signal=60%
GO:0007165_SIGNAL_TRANSDUCTION	GO:0007165_SIGNAL_TRANSDUCTION	Details ...	307	-0.633939	-2.12958	0	0	0	2112	tags=35%, list=13%, signal=39%
GO:0043051_REGULATION_OF_PHARYNGEAL_PUMPING	GO:0043051_REGULATION_OF_PHARYNGEAL_PUMPING	Details ...	37	-0.843504	-2.09729	0	0	0	1072	tags=54%, list=6%, signal=58%
GENES_LINKED_TO_OXYGEN_SENSING	GENES_LINKED_TO_OXYGEN_SENSING_CORE_EXTENDED	Details ...	23	-0.895647	-2.06397	0	0	0	811	tags=74%, list=5%, signal=78%
GO:0035556_INTRACELLULAR_SIGNAL_TRANSDUCTION	GO:0035556_INTRACELLULAR_SIGNAL_TRANSDUCTION	Details ...	153	-0.659058	-2.05449	0	0	0	1668	tags=34%, list=10%, signal=37%
GO:1905515_NON-MOTILE_CILIUM_ASSEMBLY	GO:1905515_NON-MOTILE_CILIUM_ASSEMBLY	Details ...	32	-0.832177	-2.03738	0	0	0	2304	tags=81%, list=14%, signal=94%
GO:0007635_CHEMOSENSORY_BEHAVIOR	GO:0007635_CHEMOSENSORY_BEHAVIOR	Details ...	40	-0.791254	-2.00559	0	0.000148712	0.001	1516	tags=58%, list=9%, signal=63%
GO:0034220_ION_TRANSMEMBRANE_TRANSPORT	GO:0034220_ION_TRANSMEMBRANE_TRANSPORT	Details ...	122	-0.657099	-1.98632	0	0.000132188	0.001	2142	tags=36%, list=13%, signal=41%
GO:0060271_CILIUM_ASSEMBLY	GO:0060271_CILIUM_ASSEMBLY	Details ...	41	-0.790598	-1.98052	0	0.00011897	0.001	2221	tags=68%, list=13%, signal=78%
GO:0007271_SYNAPTIC_TRANSMISSION,_CHOLINERGIC	GO:0007271_SYNAPTIC_TRANSMISSION,_CHOLINERGIC	Details ...	19	-0.896018	-1.97409	0	0.000108154	0.001	1348	tags=74%, list=8%, signal=80%
GO:0006906_VESICLE_FUSION	GO:0006906_VESICLE_FUSION	Details ...	26	-0.857036	-1.97273	0	9.91413e-05	0.001	304	tags=27%, list=2%, signal=27%
GO:0007638_MECHANOSENSORY_BEHAVIOR	GO:0007638_MECHANOSENSORY_BEHAVIOR	Details ...	27	-0.806857	-1.90481	0	0.000455057	0.005	1752	tags=63%, list=10%, signal=70%
GO:0006813_POTASSIUM_ION_TRANSPORT	GO:0006813_POTASSIUM_ION_TRANSPORT	Details ...	40	-0.745354	-1.89706	0	0.000500755	0.006	2410	tags=60%, list=14%, signal=70%
GO:0046662_REGULATION_OF_OVIPOSITION	GO:0046662_REGULATION_OF_OVIPOSITION	Details ...	44	-0.739464	-1.88915	0	0.000547624	0.007	1072	tags=41%, list=6%, signal=44%
GO:0006937_REGULATION_OF_MUSCLE_CONTRACTION	GO:0006937_REGULATION_OF_MUSCLE_CONTRACTION	Details ...	31	-0.796109	-1.88913	0	0.000513397	0.007	1528	tags=52%, list=9%, signal=57%
GO:0048791_CALCIUM_ION-REGULATED_EXOCYTOSIS_OF_NEUROTRANSMITTER	GO:0048791_CALCIUM_ION-REGULATED_EXOCYTOSIS_OF_NEUROTRANSMITTER	Details ...	13	-0.913598	-1.88572	0	0.000546913	0.008	304	tags=54%, list=2%, signal=55%
GO:0009190_CYCLIC_NUCLEOTIDE_BIOSYNTHETIC_PROCESS	GO:0009190_CYCLIC_NUCLEOTIDE_BIOSYNTHETIC_PROCESS	Details ...	34	-0.764511	-1.86141	0	0.00089486	0.014	1403	tags=47%, list=8%, signal=51%
GO:0006182_CGMP_BIOSYNTHETIC_PROCESS	GO:0006182_CGMP_BIOSYNTHETIC_PROCESS	Details ...	33	-0.76123	-1.85089	0.00215054	0.00108522	0.018	1403	tags=45%, list=8%, signal=49%
GO:0009612_RESPONSE_TO_MECHANICAL_STIMULUS	GO:0009612_RESPONSE_TO_MECHANICAL_STIMULUS	Details ...	16	-0.876503	-1.84728	0	0.00108654	0.019	887	tags=63%, list=5%, signal=66%
GO:0030030_CELL_PROJECTION_ORGANIZATION	GO:0030030_CELL_PROJECTION_ORGANIZATION		20	-0.839314	-1.83603	0.00218818	0.00135345	0.025	1096	tags=65%, list=7%, signal=69%
GO:0007212_DOPAMINE_RECEPTOR_SIGNALING_PATHWAY	GO:0007212_DOPAMINE_RECEPTOR_SIGNALING_PATHWAY		13	-0.905387	-1.83535	0	0.00129193	0.025	1338	tags=85%, list=8%, signal=92%
GO:0042073_INTRACILIARY_TRANSPORT	GO:0042073_INTRACILIARY_TRANSPORT		15	-0.878453	-1.83189	0	0.0013824	0.028	915	tags=80%, list=5%, signal=85%
GO:1901046_POSITIVE_REGULATION_OF_OVIPOSITION	GO:1901046_POSITIVE_REGULATION_OF_OVIPOSITION		21	-0.817376	-1.828	0.00203252	0.00150959	0.032	847	tags=38%, list=5%, signal=40%
GO:0043547_POSITIVE_REGULATION_OF_GTPASE_ACTIVITY	GO:0043547_POSITIVE_REGULATION_OF_GTPASE_ACTIVITY		105	-0.610047	-1.82627	0	0.00153785	0.034	1623	tags=30%, list=10%, signal=34%
GO:0071805_POTASSIUM_ION_TRANSMEMBRANE_TRANSPORT	GO:0071805_POTASSIUM_ION_TRANSMEMBRANE_TRANSPORT		79	-0.631623	-1.81886	0	0.00173769	0.04	1915	tags=42%, list=11%, signal=47%
GO:0050976_DETECTION_OF_MECHANICAL_STIMULUS_INVOLVED_IN_SENSORY_PERCEPTION_OF_TOUCH	GO:0050976_DETECTION_OF_MECHANICAL_STIMULUS_INVOLVED_IN_SENSORY_PERCEPTION_OF_TOUCH		12	-0.899977	-1.81169	0	0.0019648	0.047	886	tags=75%, list=5%, signal=79%
GO:0035725_SODIUM_ION_TRANSMEMBRANE_TRANSPORT	GO:0035725_SODIUM_ION_TRANSMEMBRANE_TRANSPORT		49	-0.672039	-1.79573	0	0.00270618	0.067	1571	tags=31%, list=9%, signal=34%
GO:0045944_POSITIVE_REGULATION_OF_TRANSCRIPTION_FROM_RNA_POLYMERASE_II_PROMOTER	GO:0045944_POSITIVE_REGULATION_OF_TRANSCRIPTION_FROM_RNA_POLYMERASE_II_PROMOTER		151	-0.571811	-1.78535	0	0.00343313	0.087	2413	tags=32%, list=14%, signal=38%
GO:0006887_EXOCYTOSIS	GO:0006887_EXOCYTOSIS		24	-0.77689	-1.78213	0	0.00369873	0.096	1327	tags=33%, list=8%, signal=36%
GO:0018107_PEPTIDYL-THREONINE_PHOSPHORYLATION	GO:0018107_PEPTIDYL-THREONINE_PHOSPHORYLATION		25	-0.764238	-1.77643	0	0.00401469	0.106	1971	tags=48%, list=12%, signal=54%
GO:0015671_OXYGEN_TRANSPORT	GO:0015671_OXYGEN_TRANSPORT		19	-0.827892	-1.7759	0.00215517	0.00388923	0.106	1916	tags=58%, list=11%, signal=65%
GO:0061065_REGULATION_OF_DAUER_LARVAL_DEVELOPMENT	GO:0061065_REGULATION_OF_DAUER_LARVAL_DEVELOPMENT		14	-0.86521	-1.77387	0	0.00390572	0.11	1299	tags=64%, list=8%, signal=70%
GO:0007631_FEEDING_BEHAVIOR	GO:0007631_FEEDING_BEHAVIOR		12	-0.888329	-1.76134	0	0.00511208	0.146	1072	tags=67%, list=6%, signal=71%
GO:0014057_POSITIVE_REGULATION_OF_ACETYLCHOLINE_SECRETION,_NEUROTRANSMISSION	GO:0014057_POSITIVE_REGULATION_OF_ACETYLCHOLINE_SECRETION,_NEUROTRANSMISSION		10	-0.913215	-1.75558	0	0.00573686	0.168	1072	tags=70%, list=6%, signal=75%
GO:0070482_RESPONSE_TO_OXYGEN_LEVELS	GO:0070482_RESPONSE_TO_OXYGEN_LEVELS		12	-0.877083	-1.74546	0	0.0067051	0.196	1467	tags=75%, list=9%, signal=82%
GO:0007626_LOCOMOTORY_BEHAVIOR	GO:0007626_LOCOMOTORY_BEHAVIOR		20	-0.791272	-1.73236	0.00229358	0.00872077	0.253	1411	tags=45%, list=8%, signal=49%
GO:0017158_REGULATION_OF_CALCIUM_ION-DEPENDENT_EXOCYTOSIS	GO:0017158_REGULATION_OF_CALCIUM_ION-DEPENDENT_EXOCYTOSIS		12	-0.900563	-1.73193	0.0021692	0.00867009	0.257	304	tags=50%, list=2%, signal=51%
GO:0008582_REGULATION_OF_SYNAPTIC_GROWTH_AT_NEUROMUSCULAR_JUNCTION	GO:0008582_REGULATION_OF_SYNAPTIC_GROWTH_AT_NEUROMUSCULAR_JUNCTION		12	-0.886068	-1.72977	0	0.00891908	0.268	1929	tags=100%, list=11%, signal=113%
GO:0007188_ADENYLATE_CYCLASE-MODULATING_G-PROTEIN_COUPLED_RECEPTOR_SIGNALING_PATHWAY	GO:0007188_ADENYLATE_CYCLASE-MODULATING_G-PROTEIN_COUPLED_RECEPTOR_SIGNALING_PATHWAY		19	-0.787533	-1.72258	0.00217865	0.0102512	0.314	1333	tags=47%, list=8%, signal=51%
GO:0051260_PROTEIN_HOMOOLIGOMERIZATION	GO:0051260_PROTEIN_HOMOOLIGOMERIZATION		42	-0.680975	-1.72089	0.00228833	0.0104215	0.325	1246	tags=26%, list=7%, signal=28%
GO:0010446_RESPONSE_TO_ALKALINE_PH	GO:0010446_RESPONSE_TO_ALKALINE_PH		8	-0.948814	-1.71862	0	0.0107661	0.342	319	tags=63%, list=2%, signal=64%
GO:0090326_POSITIVE_REGULATION_OF_LOCOMOTION_INVOLVED_IN_LOCOMOTORY_BEHAVIOR	GO:0090326_POSITIVE_REGULATION_OF_LOCOMOTION_INVOLVED_IN_LOCOMOTORY_BEHAVIOR		11	-0.869363	-1.71655	0.00206186	0.0110514	0.357	1107	tags=45%, list=7%, signal=49%
GO:0040013_NEGATIVE_REGULATION_OF_LOCOMOTION	GO:0040013_NEGATIVE_REGULATION_OF_LOCOMOTION		8	-0.925688	-1.71246	0	0.0117744	0.378	1259	tags=100%, list=7%, signal=108%
GO:2000292_REGULATION_OF_DEFECATION	GO:2000292_REGULATION_OF_DEFECATION		8	-0.927659	-1.71191	0.00203252	0.0116602	0.382	1091	tags=88%, list=6%, signal=94%
GO:0040024_DAUER_LARVAL_DEVELOPMENT	GO:0040024_DAUER_LARVAL_DEVELOPMENT		64	-0.613383	-1.70446	0	0.0138209	0.428	2014	tags=50%, list=12%, signal=57%
GO:2000294_POSITIVE_REGULATION_OF_DEFECATION	GO:2000294_POSITIVE_REGULATION_OF_DEFECATION		9	-0.899908	-1.69536	0	0.0158546	0.479	1091	tags=56%, list=6%, signal=59%
GO:0061067_NEGATIVE_REGULATION_OF_DAUER_LARVAL_DEVELOPMENT	GO:0061067_NEGATIVE_REGULATION_OF_DAUER_LARVAL_DEVELOPMENT		12	-0.83819	-1.68825	0.00622407	0.0176454	0.525	2184	tags=75%, list=13%, signal=86%
GO:1905792_POSITIVE_REGULATION_OF_MECHANOSENSORY_BEHAVIOR	GO:1905792_POSITIVE_REGULATION_OF_MECHANOSENSORY_BEHAVIOR		10	-0.884984	-1.6876	0	0.0173998	0.528	886	tags=70%, list=5%, signal=74%
GO:0030536_LARVAL_FEEDING_BEHAVIOR	GO:0030536_LARVAL_FEEDING_BEHAVIOR		12	-0.833385	-1.68658	0	0.0173913	0.536	1149	tags=50%, list=7%, signal=54%
GO:1903998_REGULATION_OF_EATING_BEHAVIOR	GO:1903998_REGULATION_OF_EATING_BEHAVIOR		9	-0.882574	-1.6797	0.00217391	0.0192649	0.58	1149	tags=67%, list=7%, signal=72%
GO:0043052_THERMOTAXIS	GO:0043052_THERMOTAXIS		11	-0.867375	-1.67684	0.00213675	0.0198257	0.594	1403	tags=64%, list=8%, signal=69%
GO:0097500_RECEPTOR_LOCALIZATION_TO_NON-MOTILE_CILIUM	GO:0097500_RECEPTOR_LOCALIZATION_TO_NON-MOTILE_CILIUM		9	-0.902806	-1.67619	0	0.0196664	0.597	566	tags=44%, list=3%, signal=46%
GO:0007602_PHOTOTRANSDUCTION	GO:0007602_PHOTOTRANSDUCTION		10	-0.870503	-1.67135	0.00411523	0.0212284	0.63	1299	tags=70%, list=8%, signal=76%
GO:1905789_POSITIVE_REGULATION_OF_DETECTION_OF_MECHANICAL_STIMULUS_INVOLVED_IN_SENSORY_PERCEPTION_OF_TOUCH	GO:1905789_POSITIVE_REGULATION_OF_DETECTION_OF_MECHANICAL_STIMULUS_INVOLVED_IN_SENSORY_PERCEPTION_OF_TOUCH		10	-0.884984	-1.66108	0.0020284	0.0252047	0.711	886	tags=70%, list=5%, signal=74%
GO:1990834_RESPONSE_TO_ODORANT	GO:1990834_RESPONSE_TO_ODORANT		14	-0.804876	-1.65494	0.00852879	0.0276554	0.747	2277	tags=64%, list=14%, signal=74%
GO:0007610_BEHAVIOR	GO:0007610_BEHAVIOR		13	-0.814124	-1.65438	0.00425532	0.0275392	0.752	474	tags=38%, list=3%, signal=40%
GO:0042493_RESPONSE_TO_DRUG	GO:0042493_RESPONSE_TO_DRUG		13	-0.823397	-1.6479	0.00668151	0.0307659	0.799	925	tags=38%, list=5%, signal=41%
GO:0045664_REGULATION_OF_NEURON_DIFFERENTIATION	GO:0045664_REGULATION_OF_NEURON_DIFFERENTIATION		11	-0.839176	-1.64411	0.00608519	0.0320669	0.819	516	tags=45%, list=3%, signal=47%
GO:0035418_PROTEIN_LOCALIZATION_TO_SYNAPSE	GO:0035418_PROTEIN_LOCALIZATION_TO_SYNAPSE		11	-0.821776	-1.64393	0.00681818	0.031571	0.82	1788	tags=64%, list=11%, signal=71%
GO:0007268_CHEMICAL_SYNAPTIC_TRANSMISSION	GO:0007268_CHEMICAL_SYNAPTIC_TRANSMISSION		21	-0.73838	-1.6428	0.0112108	0.0316062	0.825	1449	tags=48%, list=9%, signal=52%
GO:0045887_POSITIVE_REGULATION_OF_SYNAPTIC_GROWTH_AT_NEUROMUSCULAR_JUNCTION	GO:0045887_POSITIVE_REGULATION_OF_SYNAPTIC_GROWTH_AT_NEUROMUSCULAR_JUNCTION		9	-0.856056	-1.63531	0.00212314	0.0353438	0.854	1091	tags=78%, list=6%, signal=83%
GO:0043058_REGULATION_OF_BACKWARD_LOCOMOTION	GO:0043058_REGULATION_OF_BACKWARD_LOCOMOTION		10	-0.845708	-1.63321	0.0021097	0.0358548	0.864	225	tags=40%, list=1%, signal=41%
GENES_LINKED_TO_CA2+_SIGNALLING	GENES_LINKED_TO_CA2+_SIGNALLING	Details ...	40	-0.644023	-1.633	0.0090703	0.0119834	0.024	693	tags=43%, list=4%, signal=44%
GO:0035721_INTRACILIARY_RETROGRADE_TRANSPORT	GO:0035721_INTRACILIARY_RETROGRADE_TRANSPORT		7	-0.925559	-1.63018	0	0.0373488	0.88	1159	tags=86%, list=7%, signal=92%
GO:0061066_POSITIVE_REGULATION_OF_DAUER_LARVAL_DEVELOPMENT	GO:0061066_POSITIVE_REGULATION_OF_DAUER_LARVAL_DEVELOPMENT		11	-0.829457	-1.62847	0.013245	0.0379158	0.887	756	tags=36%, list=4%, signal=38%
GO:1905910_NEGATIVE_REGULATION_OF_DAUER_ENTRY	GO:1905910_NEGATIVE_REGULATION_OF_DAUER_ENTRY		8	-0.88999	-1.62051	0	0.0424538	0.926	1758	tags=88%, list=10%, signal=98%
GO:0090325_REGULATION_OF_LOCOMOTION_INVOLVED_IN_LOCOMOTORY_BEHAVIOR	GO:0090325_REGULATION_OF_LOCOMOTION_INVOLVED_IN_LOCOMOTORY_BEHAVIOR		9	-0.879665	-1.6132	0.00643777	0.0480873	0.949	1760	tags=89%, list=10%, signal=99%
GO:0007213_G-PROTEIN_COUPLED_ACETYLCHOLINE_RECEPTOR_SIGNALING_PATHWAY	GO:0007213_G-PROTEIN_COUPLED_ACETYLCHOLINE_RECEPTOR_SIGNALING_PATHWAY		7	-0.895349	-1.60829	0.0100806	0.0511841	0.963	1348	tags=71%, list=8%, signal=78%
GO:0032094_RESPONSE_TO_FOOD	GO:0032094_RESPONSE_TO_FOOD		9	-0.84039	-1.60822	0.00856531	0.0504921	0.963	1752	tags=78%, list=10%, signal=87%
GO:0035235_IONOTROPIC_GLUTAMATE_RECEPTOR_SIGNALING_PATHWAY	GO:0035235_IONOTROPIC_GLUTAMATE_RECEPTOR_SIGNALING_PATHWAY		11	-0.821766	-1.60082	0.0207469	0.0564571	0.978	2401	tags=55%, list=14%, signal=64%
GO:0030516_REGULATION_OF_AXON_EXTENSION	GO:0030516_REGULATION_OF_AXON_EXTENSION		11	-0.829623	-1.59982	0.00622407	0.0565015	0.979	2112	tags=64%, list=13%, signal=73%
GO:0040040_THERMOSENSORY_BEHAVIOR	GO:0040040_THERMOSENSORY_BEHAVIOR		11	-0.807738	-1.59742	0.0244399	0.0579415	0.984	1403	tags=45%, list=8%, signal=50%
GO:0006972_HYPEROSMOTIC_RESPONSE	GO:0006972_HYPEROSMOTIC_RESPONSE		24	-0.704709	-1.59515	0.0251716	0.0590875	0.986	1687	tags=54%, list=10%, signal=60%
GO:0050808_SYNAPSE_ORGANIZATION	GO:0050808_SYNAPSE_ORGANIZATION		8	-0.879175	-1.59339	0.00426439	0.0597705	0.988	1078	tags=50%, list=6%, signal=53%
GO:1900195_POSITIVE_REGULATION_OF_OOCYTE_MATURATION	GO:1900195_POSITIVE_REGULATION_OF_OOCYTE_MATURATION		6	-0.929807	-1.58791	0.00200803	0.0642065	0.991	942	tags=50%, list=6%, signal=53%
GO:0034765_REGULATION_OF_ION_TRANSMEMBRANE_TRANSPORT	GO:0034765_REGULATION_OF_ION_TRANSMEMBRANE_TRANSPORT		25	-0.679461	-1.58668	0.00677201	0.0646421	0.991	617	tags=48%, list=4%, signal=50%
GO:0009968_NEGATIVE_REGULATION_OF_SIGNAL_TRANSDUCTION	GO:0009968_NEGATIVE_REGULATION_OF_SIGNAL_TRANSDUCTION		11	-0.810316	-1.57946	0.0107296	0.0711328	0.996	1516	tags=55%, list=9%, signal=60%
GO:0042391_REGULATION_OF_MEMBRANE_POTENTIAL	GO:0042391_REGULATION_OF_MEMBRANE_POTENTIAL		13	-0.792622	-1.57878	0.0165975	0.0708582	0.997	2263	tags=46%, list=13%, signal=53%
GO:0050913_SENSORY_PERCEPTION_OF_BITTER_TASTE	GO:0050913_SENSORY_PERCEPTION_OF_BITTER_TASTE		9	-0.842789	-1.57769	0.0125523	0.0712379	0.997	2184	tags=78%, list=13%, signal=89%
GO:0030827_NEGATIVE_REGULATION_OF_CGMP_BIOSYNTHETIC_PROCESS	GO:0030827_NEGATIVE_REGULATION_OF_CGMP_BIOSYNTHETIC_PROCESS		5	-0.934583	-1.57576	0.00424628	0.0724539	0.997	319	tags=80%, list=2%, signal=82%
GO:0001966_THIGMOTAXIS	GO:0001966_THIGMOTAXIS		8	-0.852143	-1.57452	0.0188285	0.0730639	0.997	2452	tags=88%, list=15%, signal=102%
GO:0051302_REGULATION_OF_CELL_DIVISION	GO:0051302_REGULATION_OF_CELL_DIVISION		11	-0.804057	-1.57147	0.0147992	0.0756726	0.998	241	tags=18%, list=1%, signal=18%
GO:0006836_NEUROTRANSMITTER_TRANSPORT	GO:0006836_NEUROTRANSMITTER_TRANSPORT		27	-0.672753	-1.5693	0.0113895	0.0771017	0.999	2363	tags=41%, list=14%, signal=47%
GO:0045214_SARCOMERE_ORGANIZATION	GO:0045214_SARCOMERE_ORGANIZATION		11	-0.790273	-1.56906	0.0337553	0.0765328	0.999	1951	tags=45%, list=12%, signal=51%
GO:0016079_SYNAPTIC_VESICLE_EXOCYTOSIS	GO:0016079_SYNAPTIC_VESICLE_EXOCYTOSIS		6	-0.901388	-1.56521	0.00819672	0.0803322	0.999	1149	tags=67%, list=7%, signal=72%
GO:0007416_SYNAPSE_ASSEMBLY	GO:0007416_SYNAPSE_ASSEMBLY		8	-0.840052	-1.56356	0.020202	0.0812374	0.999	751	tags=38%, list=4%, signal=39%
GO:0046928_REGULATION_OF_NEUROTRANSMITTER_SECRETION	GO:0046928_REGULATION_OF_NEUROTRANSMITTER_SECRETION		5	-0.921457	-1.56072	0.006	0.0834215	1	527	tags=80%, list=3%, signal=83%
GO:0050920_REGULATION_OF_CHEMOTAXIS	GO:0050920_REGULATION_OF_CHEMOTAXIS		15	-0.740626	-1.55769	0.0209644	0.0861084	1	2010	tags=80%, list=12%, signal=91%
GO:0016082_SYNAPTIC_VESICLE_PRIMING	GO:0016082_SYNAPTIC_VESICLE_PRIMING		5	-0.931089	-1.55593	0.00845666	0.0874202	1	113	tags=60%, list=1%, signal=60%
GO:0042048_OLFACTORY_BEHAVIOR	GO:0042048_OLFACTORY_BEHAVIOR		83	-0.539558	-1.55567	0.00543478	0.0867372	1	2994	tags=28%, list=18%, signal=34%
GO:1990504_DENSE_CORE_GRANULE_EXOCYTOSIS	GO:1990504_DENSE_CORE_GRANULE_EXOCYTOSIS		5	-0.919797	-1.55055	0.010101	0.0923661	1	1149	tags=80%, list=7%, signal=86%
GO:0097402_NEUROBLAST_MIGRATION	GO:0097402_NEUROBLAST_MIGRATION		12	-0.789108	-1.54551	0.0185567	0.0982554	1	3038	tags=67%, list=18%, signal=81%
GO:0034613_CELLULAR_PROTEIN_LOCALIZATION	GO:0034613_CELLULAR_PROTEIN_LOCALIZATION		8	-0.848388	-1.54313	0.0137795	0.100638	1	778	tags=38%, list=5%, signal=39%
GO:1903745_NEGATIVE_REGULATION_OF_PHARYNGEAL_PUMPING	GO:1903745_NEGATIVE_REGULATION_OF_PHARYNGEAL_PUMPING		6	-0.901504	-1.54285	0.0106838	0.0999801	1	1664	tags=100%, list=10%, signal=111%
GO:0071244_CELLULAR_RESPONSE_TO_CARBON_DIOXIDE	GO:0071244_CELLULAR_RESPONSE_TO_CARBON_DIOXIDE		6	-0.901504	-1.54188	0.0122699	0.100229	1	1664	tags=100%, list=10%, signal=111%
GO:2000114_REGULATION_OF_ESTABLISHMENT_OF_CELL_POLARITY	GO:2000114_REGULATION_OF_ESTABLISHMENT_OF_CELL_POLARITY		7	-0.875819	-1.54125	0.0160966	0.100032	1	945	tags=57%, list=6%, signal=61%
GO:1900194_NEGATIVE_REGULATION_OF_OOCYTE_MATURATION	GO:1900194_NEGATIVE_REGULATION_OF_OOCYTE_MATURATION		6	-0.880691	-1.54112	0.0161616	0.0991409	1	802	tags=67%, list=5%, signal=70%
GO:0090038_NEGATIVE_REGULATION_OF_PROTEIN_KINASE_C_SIGNALING	GO:0090038_NEGATIVE_REGULATION_OF_PROTEIN_KINASE_C_SIGNALING		7	-0.875819	-1.53096	0.012024	0.112563	1	945	tags=57%, list=6%, signal=61%
GO:0043053_DAUER_ENTRY	GO:0043053_DAUER_ENTRY		17	-0.728948	-1.52899	0.0311203	0.114322	1	1125	tags=59%, list=7%, signal=63%
GO:0030431_SLEEP	GO:0030431_SLEEP		8	-0.826537	-1.52683	0.0329457	0.116202	1	2818	tags=75%, list=17%, signal=90%
GO:0006120_MITOCHONDRIAL_ELECTRON_TRANSPORT,_NADH_TO_UBIQUINONE	GO:0006120_MITOCHONDRIAL_ELECTRON_TRANSPORT,_NADH_TO_UBIQUINONE		17	-0.710873	-1.52346	0.0322581	0.120485	1	1985	tags=41%, list=12%, signal=47%
GO:0016569_COVALENT_CHROMATIN_MODIFICATION	GO:0016569_COVALENT_CHROMATIN_MODIFICATION		51	-0.576524	-1.52174	0.0149626	0.121984	1	2487	tags=27%, list=15%, signal=32%
GO:0006537_GLUTAMATE_BIOSYNTHETIC_PROCESS	GO:0006537_GLUTAMATE_BIOSYNTHETIC_PROCESS		5	-0.90822	-1.52166	0.0285714	0.120921	1	1326	tags=60%, list=8%, signal=65%
GO:1990502_DENSE_CORE_GRANULE_MATURATION	GO:1990502_DENSE_CORE_GRANULE_MATURATION		5	-0.895744	-1.51931	0.0311284	0.123096	1	1760	tags=100%, list=10%, signal=112%
GO:0061096_NEGATIVE_REGULATION_OF_TURNING_BEHAVIOR_INVOLVED_IN_MATING	GO:0061096_NEGATIVE_REGULATION_OF_TURNING_BEHAVIOR_INVOLVED_IN_MATING		7	-0.880066	-1.51915	0.00609756	0.12225	1	887	tags=71%, list=5%, signal=75%
GO:0007200_PHOSPHOLIPASE_C-ACTIVATING_G-PROTEIN_COUPLED_RECEPTOR_SIGNALING_PATHWAY	GO:0007200_PHOSPHOLIPASE_C-ACTIVATING_G-PROTEIN_COUPLED_RECEPTOR_SIGNALING_PATHWAY		10	-0.81264	-1.51712	0.0381356	0.123685	1	2101	tags=70%, list=12%, signal=80%
GO:0097499_PROTEIN_LOCALIZATION_TO_NON-MOTILE_CILIUM	GO:0097499_PROTEIN_LOCALIZATION_TO_NON-MOTILE_CILIUM		7	-0.840835	-1.51481	0.0297619	0.125868	1	566	tags=29%, list=3%, signal=30%
GO:0043087_REGULATION_OF_GTPASE_ACTIVITY	GO:0043087_REGULATION_OF_GTPASE_ACTIVITY		11	-0.778917	-1.51407	0.0301724	0.125862	1	932	tags=18%, list=6%, signal=19%
DELAYED_PRGS	DELAYED_PRGS	Details ...	47	-0.585278	-1.50738	0.0152672	0.0438456	0.114	1075	tags=32%, list=6%, signal=34%
GO:0048488_SYNAPTIC_VESICLE_ENDOCYTOSIS	GO:0048488_SYNAPTIC_VESICLE_ENDOCYTOSIS		11	-0.78182	-1.50298	0.0301075	0.142282	1	1570	tags=45%, list=9%, signal=50%
GO:1902474_POSITIVE_REGULATION_OF_PROTEIN_LOCALIZATION_TO_SYNAPSE	GO:1902474_POSITIVE_REGULATION_OF_PROTEIN_LOCALIZATION_TO_SYNAPSE		5	-0.896439	-1.49902	0.031746	0.147621	1	1072	tags=60%, list=6%, signal=64%
GO:0050893_SENSORY_PROCESSING	GO:0050893_SENSORY_PROCESSING		6	-0.858156	-1.49805	0.0345572	0.14788	1	1864	tags=83%, list=11%, signal=94%
GO:0086010_MEMBRANE_DEPOLARIZATION_DURING_ACTION_POTENTIAL	GO:0086010_MEMBRANE_DEPOLARIZATION_DURING_ACTION_POTENTIAL		5	-0.89325	-1.49556	0.0354167	0.150953	1	316	tags=60%, list=2%, signal=61%
GO:0007269_NEUROTRANSMITTER_SECRETION	GO:0007269_NEUROTRANSMITTER_SECRETION		8	-0.830473	-1.49538	0.0276596	0.149937	1	1327	tags=63%, list=8%, signal=68%
GO:0007606_SENSORY_PERCEPTION_OF_CHEMICAL_STIMULUS	GO:0007606_SENSORY_PERCEPTION_OF_CHEMICAL_STIMULUS		89	-0.518015	-1.49441	0.00928074	0.150212	1	3562	tags=31%, list=21%, signal=40%
GO:0006811_ION_TRANSPORT	GO:0006811_ION_TRANSPORT		327	-0.443762	-1.49131	0	0.15402	1	2143	tags=29%, list=13%, signal=32%
GO:0006518_PEPTIDE_METABOLIC_PROCESS	GO:0006518_PEPTIDE_METABOLIC_PROCESS		8	-0.813548	-1.48895	0.0375783	0.155491	1	185	tags=38%, list=1%, signal=38%
GO:0007205_PROTEIN_KINASE_C-ACTIVATING_G-PROTEIN_COUPLED_RECEPTOR_SIGNALING_PATHWAY	GO:0007205_PROTEIN_KINASE_C-ACTIVATING_G-PROTEIN_COUPLED_RECEPTOR_SIGNALING_PATHWAY		5	-0.881929	-1.48857	0.0294118	0.154805	1	889	tags=80%, list=5%, signal=84%
GO:0051932_SYNAPTIC_TRANSMISSION,_GABAERGIC	GO:0051932_SYNAPTIC_TRANSMISSION,_GABAERGIC		7	-0.824697	-1.48765	0.0408163	0.154971	1	1449	tags=43%, list=9%, signal=47%
GO:0008344_ADULT_LOCOMOTORY_BEHAVIOR	GO:0008344_ADULT_LOCOMOTORY_BEHAVIOR		8	-0.805958	-1.48744	0.0475248	0.153915	1	1687	tags=25%, list=10%, signal=28%
GO:0050807_REGULATION_OF_SYNAPSE_ORGANIZATION	GO:0050807_REGULATION_OF_SYNAPSE_ORGANIZATION		7	-0.833658	-1.4862	0.035865	0.154688	1	2112	tags=71%, list=13%, signal=82%
GO:1904491_PROTEIN_LOCALIZATION_TO_CILIARY_TRANSITION_ZONE	GO:1904491_PROTEIN_LOCALIZATION_TO_CILIARY_TRANSITION_ZONE		6	-0.855695	-1.47809	0.0490798	0.165929	1	2279	tags=83%, list=14%, signal=96%
GO:0043059_REGULATION_OF_FORWARD_LOCOMOTION	GO:0043059_REGULATION_OF_FORWARD_LOCOMOTION		5	-0.903172	-1.47664	0.0281385	0.16595	1	1334	tags=80%, list=8%, signal=87%
GO:0006821_CHLORIDE_TRANSPORT	GO:0006821_CHLORIDE_TRANSPORT		43	-0.569084	-1.47538	0.0305344	0.16677	1	1400	tags=28%, list=8%, signal=30%
GO:0032228_REGULATION_OF_SYNAPTIC_TRANSMISSION,_GABAERGIC	GO:0032228_REGULATION_OF_SYNAPTIC_TRANSMISSION,_GABAERGIC		8	-0.786439	-1.46829	0.0368098	0.176378	1	608	tags=50%, list=4%, signal=52%
GO:0001666_RESPONSE_TO_HYPOXIA	GO:0001666_RESPONSE_TO_HYPOXIA		11	-0.743747	-1.45809	0.048218	0.192783	1	1608	tags=45%, list=10%, signal=50%
GO:0015870_ACETYLCHOLINE_TRANSPORT	GO:0015870_ACETYLCHOLINE_TRANSPORT		5	-0.870231	-1.45663	0.0495868	0.192853	1	1334	tags=60%, list=8%, signal=65%
GO:0051965_POSITIVE_REGULATION_OF_SYNAPSE_ASSEMBLY	GO:0051965_POSITIVE_REGULATION_OF_SYNAPSE_ASSEMBLY		5	-0.849413	-1.45506	0.046748	0.193028	1	1929	tags=80%, list=11%, signal=90%
GO:1902476_CHLORIDE_TRANSMEMBRANE_TRANSPORT	GO:1902476_CHLORIDE_TRANSMEMBRANE_TRANSPORT		48	-0.554085	-1.4549	0.0286396	0.191935	1	1400	tags=25%, list=8%, signal=27%
GO:0010877_LIPID_TRANSPORT_INVOLVED_IN_LIPID_STORAGE	GO:0010877_LIPID_TRANSPORT_INVOLVED_IN_LIPID_STORAGE		8	-0.802984	-1.44779	0.0496894	0.199142	1	1446	tags=50%, list=9%, signal=55%
GO:0010754_NEGATIVE_REGULATION_OF_CGMP-MEDIATED_SIGNALING	GO:0010754_NEGATIVE_REGULATION_OF_CGMP-MEDIATED_SIGNALING		5	-0.886885	-1.43766	0.0381356	0.21535	1	1467	tags=80%, list=9%, signal=88%
GO:0007399_NERVOUS_SYSTEM_DEVELOPMENT	GO:0007399_NERVOUS_SYSTEM_DEVELOPMENT		74	-0.515121	-1.43204	0.0248139	0.224916	1	1700	tags=32%, list=10%, signal=36%
GO:0016311_DEPHOSPHORYLATION	GO:0016311_DEPHOSPHORYLATION		104	-0.482205	-1.42953	0.013624	0.228217	1	1071	tags=13%, list=6%, signal=14%

[truncated: 5 more sheets: GFP7_age_pos, WW21_age_neg, WW21_age_pos, WW7_age_neg, WW7_age_pos]
