# Supplementary material for: High neural activity accelerates the decline of cognitive plasticity with age in Caenorhabditis elegans
Source: eLife. 2020 Nov 24;9:e59711. doi: 10.7554/eLife.59711 (PMC7685709; doi:10.7554/eLife.59711)
Supplement: Supplementary file 6. [file elife-59711-supp6.xlsx]

## Sheet: Sheet1
												Activity-regulated genes (C. elegans orthologues of the gene sets defined in Tyssowski et al., 2018)
	Genes linked to oxygen sensing		Genes linked to Ca2+ signalling		Genes linked to oxidative stress and redox stress/regulation		Genes linked to translation					Rapid PRGs	delayed PRGs	SRGs
	npr-1		stim-1		dpy-11		gene_name	human homologue	gene_id			egrh-1	efk-1	clec-178
	gcy-34		rcan-1		skn-1		eif-1.A	eIF1AY	WBGene00019162			egrh-3	tat-3	tig-2
	gcy-37		ncx-5		pdi-1		ZK856.11	eIF1AD	WBGene00014112			fos-1	tat-4	unc-129
	gcy-32		ncx-4		pdi-2		eif-1	eIF1B	WBGene00020868			klf-3	athp-2	tep-1
	gcy-36		ncx-1		pdi-3		eif-2A	eIF2A	not expressed			maf-1	rep-1	F22F7.7
	gcy-35		ncx-2		pdi-6		Y37E3.10 eif-2alpha	EIF2S1	WBGene00021351			nhr-6	gar-3	mtm-5
	ncx-5		ncx-3		sod-1		Y39G10AR.8 eif-2gamma	EIF2S3	WBGene00021466			sex-1	R144.13	hda-4
	cng-1		sca-1		sod-4		ZK1098.4 - eif-2Balpha	eIF2B1	WBGene00014221				crh-1	hda-6
	glb-5		csq-1		ero-1		Y47H9C.7 - eif-2Bbeta	EIF2B2	WBGene00012950				C41D11.3	shk-1
	tax-2		pmr-1		pink-1		D2085.3 eif-2Bepsilon	eIF2B5	WBGene00008428				rbc-1	irk-1
	tax-4		mcu-1		kgb-1		egl-45	eIF3A	WBGene00001209				ears-1	irk-2
	gcy-33		cmk-1		prdx-2		eif-3.B	eIF3B	WBGene00001225				pars-1	pan-1
	pde-1		ckk-1		lrk-1		eif-3.C		WBGene00001226				D1069.3	nas-39
	itr-1		unc-43		mev-1		eif-3.D		WBGene00001227				pqn-44	toca-1
	unc-68		mca-1		acs-19		eif-3.E		WBGene00001228				cat-4	toca-2
	egl-19		mca-2		ctl-2		eif-3.F		WBGene00001229				gras-1
	ahr-1		mca-3		gcs-1		eif-3.G		WBGene00001230				npr-6
	aha-1		itr-1		gss-1		eif-3.H		WBGene00001231				npr-22
	pde-1		unc-68		gst-1		eif-3.I		WBGene00001232				exp-2
	pde-2		tax-4		gst-7		eif-3.J		WBGene00012738				kvs-4
	hif-1		tax-2		gst-21		eif-3.K		WBGene00001233				irk-1
	tax-6		egl-19		gst-22		C17G10.9	eIF3L	WBGene00015920				irk-2
	egl-4		unc-2		gst-28		eif-6	eIF6	WBGene00001234				sptf-3
	egl-2		cca-1		gst-36								mbl-1
			ccb-1		gst-42		inf-1	eIF4A1	WBGene00002083				Y17G7B.17
			nra-1		gsr-1		F57B9.3	EIF4A1 and EIF4A2	WBGene00018997				magu-1
			crt-1		trxr-1		Y65B4A.6	EIF4A3	WBGene00022029				dao-3
			cmd-1		trxr-2		F33D11.10	EIF4A3	WBGene00018007				npr-24
			cal-2		glrx-3								F30B5.4
			cnb-1		bli-3		ife-1	eIF4E	WBGene00002059				pgal-1
			cal-4		aak-1		ife-5	eIF4E	WBGene00002063				pghm-1
			tax-6		aak-2		ife-4	eIF4E	WBGene00002062				par-6
			ncs-2		gst-4		ife-3	eIF4E	WBGene00002061				bli-4
			micu-1		ivd-1		ife-2	eIF4E	WBGene00002060				kpc-1
			calu-1		pxn-1		ifg-1	eIF4G	WBGene00002066				lin-42
			calu-2		pxn-2		drr-2	EIF4H	WBGene00011730				T19B10.8
			nucb-1		daf-16		C37C3.2	eIF5	WBGene00016496				ceh-18
			mlc-2		hif-1		iff-1	eIF5A2	WBGene00002064				rgef-1
			mlc-3		cysl-1		iff-2	eIF5A2	WBGene00002065				rgs-1
			mlc-4		cysl-2		iffb-1	EIF5B	WBGene00021857				rgs-2
			mlc-5		skpo-1								rheb-1
								elongation factors					H10E21.5
							eef-1G	eEF1G	WBGene00008920				C50D2.2
							eef-1B.1	eEF1B	WBGene00018846				F23F1.6
							eef-1B.2	eEF1B	WBGene00012768				npr-24
							eef-1A.1	eEF1A	WBGene00001168				nipi-3
							eef-1A.2	eEF1A	WBGene00001169				tkr-1
							eef-2	eEF2	WBGene00001167				tbc-9
							eftu-2	EFTUD2	WBGene00001166
								termination factors
							erfa-1	ETF1	WBGene00020269
							erfa-3	GSPT1	WBGene00010405
								others:
							hel-1	Helicase	WBGene00001840
							T26G10.1	Helicase	WBGene00012059
							ddx-19	Helicase	WBGene00011580
							hrpf-2	HNRNPF	WBGene00022253
