# Supplementary material for: High neural activity accelerates the decline of cognitive plasticity with age in Caenorhabditis elegans
Source: eLife. 2020 Nov 24;9:e59711. doi: 10.7554/eLife.59711 (PMC7685709; doi:10.7554/eLife.59711)
Supplement: Supplementary file 7. [file elife-59711-supp7.xlsx]

## Sheet: genes downregulated with ageing
genes
	Gene Wormbase ID	Gene Name						Source:
0	WBGene00017969	Uncharacterized serine carboxypeptidase F32A5.3(F32A5.3)						https://www.nature.com/articles/s41598-019-43075-z#Sec11
1	WBGene00012608	Probable hydroxyacid-oxoacid transhydrogenase, mitochondrial(Y38F1A.6)
2	WBGene00018811	Phosphoethanolamine MethylTransferase(pmt-2)						"MetaWorm" database
3	WBGene00009048	CystaTHionine gamma lyase(cth-1)
4	WBGene00018138	Folate-like transporter 2(folt-2)
5	WBGene00007455	UDP-glucuronosyltransferase(ugt-22)
6	WBGene00011182	hypothetical protein(R09H10.5)
7	WBGene00001692	GRounDhog (hedgehog-like family)(grd-3)
8	WBGene00021503	Carboxypeptidase(ctsa-2)
9	WBGene00000699	COLlagen(col-125)
10	WBGene00001155	Probable enoyl-CoA hydratase, mitochondrial(ech-6)
11	WBGene00001694	GRounDhog (hedgehog-like family)(grd-5)
12	WBGene00015514	hypothetical protein(C06A8.3)
13	WBGene00004986	SaPosin-like Protein family(spp-1)
14	WBGene00001239	Elongation of very long chain fatty acids protein(elo-1)
15	WBGene00000172	AQuaPorin or aquaglyceroporin related(aqp-4)
16	WBGene00010070	NEPrilysin metallopeptidase family(nep-17)
17	WBGene00000733	COLlagen(col-160)
18	WBGene00004020	Intestinal acid phosphatase(pho-1)
19	WBGene00010266	DAF-16/FOXO Controlled, germline Tumor affecting(dct-18)
20	WBGene00013238	TRanslocon-Associated Protein(trap-4)
21	WBGene00000677	COLlagen(col-103)
22	WBGene00010142	hypothetical protein(F56A8.8)
23	WBGene00013347	hypothetical protein(Y59A8B.10)
24	WBGene00000732	COLlagen(col-159)
25	WBGene00016217	hypothetical protein(C29F9.2)
26	WBGene00014138	C-type LECtin(clec-186)
27	WBGene00002183	Acetyl-CoA acetyltransferase homolog, mitochondrial(kat-1)
28	WBGene00004062	Peroxisomal Membrane Protein related(pmp-5)
29	WBGene00004492	40S ribosomal protein S23(rps-23)
30	WBGene00017926	hypothetical protein(F29C4.2)
31	WBGene00007107	Probable prefoldin subunit 4(pfd-4)
32	WBGene00000781	Gut-specific cysteine proteinase(cpr-1)
33	WBGene00001104	Delta-like protein(dsl-2)
34	WBGene00020182	UDP-GlucuronosylTransferase(ugt-53)
35	WBGene00017659	hypothetical protein(F21C10.10)
36	WBGene00013699	hypothetical protein(Y106G6D.2)
37	WBGene00009049	hypothetical protein(F22B8.7)
38	WBGene00016596	hypothetical protein(C42D4.3)
39	WBGene00008707	hypothetical protein(F11E6.3)
40	WBGene00010317	Isocitrate DeHydrogenase(idh-1)
41	WBGene00008338	RNA polymerase II-associated factor 1 homolog(pafo-1)
42	WBGene00001758	Glutathione S-Transferase(gst-10)
43	WBGene00006724	Probable ubiquitin carboxyl-terminal hydrolase ubh-4(ubh-4)
44	WBGene00007460	hypothetical protein(C08F11.13)
45	WBGene00021725	BTB and MATH domain containing(bath-9)
46	WBGene00017010	hypothetical protein(D1007.15)
47	WBGene00020801	hypothetical protein(T25D10.4)
48	WBGene00001243	Elongation of very long chain fatty acids protein(elo-5)
49	WBGene00004048	Plexin-2(plx-2)
50	WBGene00010471	CaDmium Responsive(cdr-6)
51	WBGene00018407	hypothetical protein(F44B9.2)
52	WBGene00003934	Paralysed Arrest at Two-fold(pat-10)
53	WBGene00010808	Suppressor of Ectopic P granules in Autophagy mutant(sepa-1)
54	WBGene00022245	ACid Phosphatase family(acp-6)
55	WBGene00000673	COLlagen(col-98)
56	WBGene00011487	hypothetical protein(T05E12.6)
57	WBGene00012240	hypothetical protein(W04A8.5)
58	WBGene00000656	Putative cuticle collagen 80(col-80)
59	WBGene00011398	Quinoid DihydroPteridine Reductase(qdpr-1)
60	WBGene00000664	COLlagen(col-89)
61	WBGene00000698	COLlagen(col-124)
62	WBGene00003091	LYSozyme(lys-2)
63	WBGene00013516	hypothetical protein(Y73F4A.3)
64	WBGene00009824	Glycerol-3-phosphate dehydrogenase [NAD(+)](gpdh-1)
65	WBGene00001395	Delta(6)-fatty-acid desaturase fat-3(fat-3)
66	WBGene00017925	hypothetical protein(F29B9.11)

## Sheet: genes upregulated with ageing
Up-regulated components of the aging signature
	Gene Wormbase ID	Gene Name				Source:
0	WBGene00011486	hypothetical protein(T05E12.3)				https://www.nature.com/articles/s41598-019-43075-z#Sec11
1	WBGene00021977	hypothetical protein(Y58A7A.3)
2	WBGene00004509	RNA-dependent RNA polymerase Family(rrf-2)				"MetaWorm" database
3	WBGene00008862	hypothetical protein(F15D4.5)
4	WBGene00021002	hypothetical protein(W03F9.4)
5	WBGene00007883	hypothetical protein(C33A12.4)
6	WBGene00016670	Invertebrate LYSozyme(ilys-3)
7	WBGene00008922	hypothetical protein(F17C11.11)
8	WBGene00010440	TransThyretin-Related family domain(ttr-51)
9	WBGene00011737	SeQueSTosome related(sqst-1)
10	WBGene00018803	F-box A protein(fbxa-24)
11	WBGene00000562	Cyclic Nucleotide Gated channel(cng-1)
12	WBGene00016638	PERMeable eggshell(perm-4)
13	WBGene00021349	ADP-ribosylation factor-like protein 13B(arl-13)
14	WBGene00003092	Lysozyme-like protein 3(lys-3)
15	WBGene00012101	bZIP transcription factor family(zip-10)
16	WBGene00021369	E3 ubiquitin-protein ligase siah-1(siah-1)
17	WBGene00015076	hypothetical protein(B0238.12)
18	WBGene00000301	Caveolin(cav-1)
19	WBGene00021114	hypothetical protein(W09C3.7)
20	WBGene00017361	hypothetical protein(F10E9.12)
21	WBGene00011383	hypothetical protein(T02E9.5)
22	WBGene00001076	DumPY: shorter than wild-type(dpy-17)
23	WBGene00020865	hypothetical protein(T27E4.7)
24	WBGene00022473	Bromodomain-containing protein bet-1(bet-1)
25	WBGene00021005	hypothetical protein(W03F11.1)
26	WBGene00016520	hypothetical protein(C39B5.2)
27	WBGene00005018	Cuticle collagen 1(sqt-3)
28	WBGene00006539	TuBulin, Beta(tbb-6)
29	WBGene00011727	hypothetical protein(T12A7.6)
30	WBGene00016862	Carboxylic ester hydrolase(C52A10.1)
31	WBGene00000516	Cyclin-dependent kinase inhibitor 1(cki-1)
32	WBGene00006701	Ubiquitin-conjugating enzyme E2 1(ubc-1)
33	WBGene00022112	hypothetical protein(Y71F9AL.7)
34	WBGene00004446	Ribosomal Protein, Large subunit(rpl-32)
35	WBGene00016845	hypothetical protein(C50F7.5)
36	WBGene00011231	hypothetical protein(R11A5.3)
37	WBGene00012113	hypothetical protein(T28B8.1)
38	WBGene00004496	40S ribosomal protein S27(rps-27)
39	WBGene00008923	hypothetical protein(F17C11.12)
40	WBGene00004497	40S ribosomal protein S28(rps-28)
41	WBGene00011733	hypothetical protein(T12D8.5)
42	WBGene00011966	hypothetical protein(T23G7.3)
43	WBGene00022111	hypothetical protein(Y71F9AL.6)
44	WBGene00002018	Heat shock protein Hsp-16.41(hsp-16.41)
45	WBGene00001105	Delta-like protein(dsl-3)
46	WBGene00022554	DUX (vertebrate dual homeobox) Like(duxl-1)
47	WBGene00020579	hypothetical protein(T19D12.4)
48	WBGene00009212	hypothetical protein(F28D1.2)
49	WBGene00016003	hypothetical protein(C18H9.5)
50	WBGene00003589	Annexin(nex-2)
51	WBGene00014006	hypothetical protein(ZK596.1)
52	WBGene00007097	hypothetical protein(B0024.4)
53	WBGene00013859	hypothetical protein(ZC247.1)
54	WBGene00016636	PERMeable eggshell(perm-2)
55	WBGene00021468	Ectopic P granules protein 2(epg-2)
56	WBGene00004435	60S ribosomal protein L23(rpl-23)
57	WBGene00014199	hypothetical protein(ZK1053.4)
58	WBGene00001170	Programmed cell death activator egl-1(egl-1)
59	WBGene00003473	Metallothionein-1(mtl-1)
60	WBGene00021875	hypothetical protein(Y54G2A.10)
61	WBGene00016121	hypothetical protein(C25H3.12)
62	WBGene00004450	60S ribosomal protein L36(rpl-36)
63	WBGene00008563	hypothetical protein(F07H5.13)
64	WBGene00013735	hypothetical protein(Y111B2A.12)
65	WBGene00004498	Ribosomal Protein, Small subunit(rps-29)
66	WBGene00022027	related to yeast Vacuolar Protein Sorting factor(vps-20)
67	WBGene00019426	CUTiclin-Like(cutl-16)
68	WBGene00012592	hypothetical protein(Y38E10A.14)
69	WBGene00004489	Ribosomal Protein, Small subunit(rps-20)
70	WBGene00001577	Gon-2 Extragenic Modifier(gem-4)
71	WBGene00002026	Heat Shock Protein(hsp-70)
72	WBGene00012910	hypothetical protein(Y46G5A.20)
73	WBGene00018787	CUTiclin-Like(cutl-20)
74	WBGene00001377	Eyes absent homolog(eya-1)
75	WBGene00009948	Serine/threonine-protein phosphatase(F52H3.6)
76	WBGene00009724	hypothetical protein(F45D3.4)
77	WBGene00013898	hypothetical protein(ZC443.3)
78	WBGene00022357	KNL (kinetochore null) Binding Protein(kbp-4)
79	WBGene00011435	hypothetical protein(T04D3.8)
80	WBGene00017127	hypothetical protein(E04F6.8)
81	WBGene00004473	40S ribosomal protein S4(rps-4)
82	WBGene00021915	hypothetical protein(Y55D5A.1)
83	WBGene00015582	hypothetical protein(C07H6.9)
84	WBGene00013671	hypothetical protein(Y105E8A.11)
85	WBGene00021348	MOdifier of protein AGgregation(moag-4)
86	WBGene00021876	hypothetical protein(Y54G2A.11)
87	WBGene00000370	Conserved Cysteine/Glycine domain protein(ccg-1)
88	WBGene00021374	hypothetical protein(Y37E11B.1)
89	WBGene00007835	O-ACyltransferase homolog(oac-7)
90	WBGene00022051	Rab Escort Protein homolog(rep-1)
91	WBGene00000535	Cystatin(cpi-1)
92	WBGene00021691	hypothetical protein(Y48G8AL.13)
93	WBGene00021871	yeast DiM Like(dml-1)
94	WBGene00016574	hypothetical protein(C41H7.4)
95	WBGene00016655	Acyl-CoA-binding protein homolog 1(acbp-1)
96	WBGene00004077	Protein pop-1(pop-1)
97	WBGene00022099	hypothetical protein(Y69A2AR.28)
98	WBGene00021475	TuBulin folding Cofactor A homolog(tbca-1)
99	WBGene00022092	hypothetical protein(Y69A2AR.21)
100	WBGene00021347	DNA-directed RNA polymerases I, II, and III subunit RPABC5(rpb-10)
101	WBGene00003123	Protein mago nashi homolog(mag-1)
102	WBGene00016746	hypothetical protein(C48B6.10)
103	WBGene00016627	hypothetical protein(C44B7.5)
104	WBGene00004248	PseudoUridine Synthase family(pus-1)
105	WBGene00003111	Semaphorin-2A(mab-20)
106	WBGene00022369	hypothetical protein(Y92H12BR.3)
107	WBGene00017563	hypothetical protein(F18C5.10)
108	WBGene00012471	hypothetical protein(Y17G7B.20)
109	WBGene00013181	hypothetical protein(Y53H1B.2)
110	WBGene00017220	hypothetical protein(F07F6.8)
111	WBGene00012136	hypothetical protein(T28F4.1)
112	WBGene00012903	related to yeast Vacuolar Protein Sorting factor(vps-2)
113	WBGene00013678	hypothetical protein(Y105E8A.20)
114	WBGene00013461	hypothetical protein(Y67H2A.2)
115	WBGene00000889	Peptidyl-prolyl cis-trans isomerase(cyn-13)
116	WBGene00001976	HMG(hmg-11)
117	WBGene00000545	CaLPain family(clp-4)
118	WBGene00017143	hypothetical protein(EEED8.15)
119	WBGene00002016	Heat Shock Protein(hsp-16.2)
120	WBGene00007133	hypothetical protein(B0284.3)
121	WBGene00004063	Calcium-transporting ATPase(pmr-1)
122	WBGene00022129	eLRR (extracellular Leucine-Rich Repeat) ONly(lron-11)
123	WBGene00004456	60S ribosomal protein L37a(rpl-43)
124	WBGene00004272	RAB family(rab-8)
125	WBGene00006698	U2AF splicing factor(uaf-2)
126	WBGene00004410	Ribosomal protein, Large subunit, Acidic (P1)(rla-2)
127	WBGene00007628	hypothetical protein(C16C10.8)
128	WBGene00018958	Carboxylic ester hydrolase(F56C11.6)
129	WBGene00021576	F-box C protein(fbxc-51)
130	WBGene00004415	60S ribosomal protein L4(rpl-4)
131	WBGene00000414	Chromo domain-containing protein cec-1(cec-1)
132	WBGene00000783	Cathepsin B-like cysteine proteinase 3(cpr-3)
133	WBGene00013244	hypothetical protein(Y56A3A.33)
134	WBGene00000219	Aspartic protease 6(asp-6)
135	WBGene00003648	Nuclear Hormone Receptor family(nhr-58)
136	WBGene00021371	N-Acyl Phosphatidyl Ethanolamine specific phospholipase D (NAPE-PLD) homolog(nape-1)
137	WBGene00004482	40S ribosomal protein S13(rps-13)
138	WBGene00021167	CYtochrome P450 family(cyp-32B1)
139	WBGene00012420	hypothetical protein(Y7A9D.1)
140	WBGene00019427	Autophagic-related protein 16.2(atg-16.2)
141	WBGene00003474	Metallothionein-2(mtl-2)
142	WBGene00022169	hypothetical protein(Y71H2AM.4)
143	WBGene00000898	Insulin-like receptor subunit beta(daf-2)
144	WBGene00015115	hypothetical protein(B0286.1)
145	WBGene00001938	Histone H4(his-64)
146	WBGene00022336	ATP synthase lipid-binding protein, mitochondrial(Y82E9BR.3)
147	WBGene00000469	Cell death specification protein 2(ces-2)
148	WBGene00017316	Probable phospholipase D F09G2.8(F09G2.8)
149	WBGene00015505	hypothetical protein(C06A5.8)
150	WBGene00001500	Ferritin(ftn-1)
151	WBGene00020985	Serine/threonine-protein phosphatase(W03D8.2)
152	WBGene00007024	PeriLIpiN homolog(plin-1)
153	WBGene00009776	UPF0587 protein F46B6.12(F46B6.12)
154	WBGene00003618	Nuclear hormone receptor family member nhr-19(nhr-19)
155	WBGene00015518	hypothetical protein(C06E1.1)
156	WBGene00012021	hypothetical protein(T25E12.6)
157	WBGene00016262	hypothetical protein(C30F12.3)
158	WBGene00017908	hypothetical protein(F28H1.1)
159	WBGene00011156	hypothetical protein(R09B3.3)
160	WBGene00004249	PDGF/VEGF growth factor related(pvf-1)
161	WBGene00022235	homologous to Drosophila SQD (squid) protein(sqd-1)
162	WBGene00012961	hypothetical protein(Y47H10A.5)
163	WBGene00022348	hypothetical protein(Y82E9BR.16)
164	WBGene00017467	hypothetical protein(F14F9.4)
165	WBGene00011059	hypothetical protein(R06C1.4)
166	WBGene00013691	hypothetical protein(Y105E8B.6)
167	WBGene00010262	dietary restriction over expressed(droe-4)
168	WBGene00015569	hypothetical protein(C07D10.5)
169	WBGene00022025	hypothetical protein(Y65B4A.1)
170	WBGene00013020	hypothetical protein(Y48G10A.3)
171	WBGene00001086	Chromosome condensation protein dpy-27(dpy-27)
172	WBGene00011428	hypothetical protein(T04C12.3)
173	WBGene00009927	hypothetical protein(F52B11.5)
174	WBGene00013434	hypothetical protein(Y66D12A.8)
175	WBGene00004458	proteasome Regulatory Particle, Non-ATPase-like(rpn-1)
176	WBGene00000787	Endonuclease G, mitochondrial(cps-6)
177	WBGene00009696	hypothetical protein(F44F1.4)
178	WBGene00013266	hypothetical protein(Y57A10A.26)
179	WBGene00016782	PHAryngeal gland Toxin-related(phat-3)
180	WBGene00001852	Histone H1.X(hil-1)
181	WBGene00002069	I Kappa B homolog(ikb-1)
182	WBGene00012730	5'-3' exoribonuclease 1(xrn-1)
183	WBGene00010639	Protein kish(K07F5.15)
184	WBGene00009834	hypothetical protein(lsy-27)
185	WBGene00010174	hypothetical protein(F56H9.2)
186	WBGene00021843	hypothetical protein(Y54E10BR.4)
187	WBGene00003072	Low-density lipoprotein RecePtor related(lrp-2)
188	WBGene00013024	Choline/EthanolaminePhosphoTransferase(cept-2)
189	WBGene00019113	hypothetical protein(F59E11.7)
190	WBGene00011263	hypothetical protein(R13H4.5)
191	WBGene00022848	hypothetical protein(ZK1055.7)
192	WBGene00001601	ATP-dependent RNA helicase glh-4(glh-4)
193	WBGene00004454	Ribosomal protein L36.A(rpl-36.A)
194	WBGene00013079	TransThyretin-Related family domain(ttr-26)
195	WBGene00011801	hypothetical protein(T16G1.7)
196	WBGene00021293	hypothetical protein(Y25C1A.6)
197	WBGene00018210	hypothetical protein(F39G3.5)
198	WBGene00021945	Ankyrin repeat and LEM domain-containing protein 2 homolog(lem-4)
199	WBGene00003093	LYSozyme(lys-4)
200	WBGene00019327	bZIP transcription factor family(zip-2)
201	WBGene00001026	DNaJ domain (prokaryotic heat shock protein)(dnj-8)
202	WBGene00004409	60S acidic ribosomal protein P1(rla-1)
203	WBGene00011072	Putative protein tag-209(tag-209)
204	WBGene00008113	hypothetical protein(C46C2.5)
205	WBGene00004485	40S ribosomal protein S16(rps-16)
206	WBGene00006930	Vitellogenin-6(vit-6)
207	WBGene00019698	Serine/threonine-protein kinase RIO1(riok-1)
208	WBGene00018384	hypothetical protein(F43C11.7)
209	WBGene00001386	Fatty-acid and retinol-binding protein 2(far-2)
210	WBGene00021396	CUTiclin-Like(cutl-24)
211	WBGene00021121	hypothetical protein(W09G12.7)
212	WBGene00004501	26S protease regulatory subunit 7(rpt-1)
213	WBGene00004700	Probable splicing factor, arginine/serine-rich 3(rsp-3)
214	WBGene00021363	TAF (TBP-associated transcription factor) family(taf-6.2)
215	WBGene00015935	hypothetical protein(C17H12.10)
216	WBGene00004499	Ribosomal Protein, Small subunit(rps-30)
217	WBGene00017128	hypothetical protein(E04F6.9)
218	WBGene00019013	Twenty One u-rna (21U-RNA) biogenesis Fouled Up(tofu-4)
219	WBGene00003617	Nuclear hormone receptor family member nhr-18(nhr-18)
220	WBGene00017583	hypothetical protein(F19B10.1)
221	WBGene00004448	Ribosomal Protein, Large subunit(rpl-34)
222	WBGene00004096	ParaQuat (Methylviologen) responsive(pqm-1)
223	WBGene00016332	hypothetical protein(C32F10.4)
224	WBGene00000426	Cell death abnormality protein 12(ced-12)
225	WBGene00001210	hypothetical protein(egl-46)
226	WBGene00010587	Suppressor Of Lurcher movement defect(sol-2)
227	WBGene00004880	Regulator of nonsense transcripts 1(smg-2)
228	WBGene00016540	hypothetical protein(C39F7.5)
229	WBGene00010790	Alcohol dehydrogenase 1(sodh-1)
230	WBGene00000373	CYtochrome P450 family(cyp-14A5)
231	WBGene00017506	hypothetical protein(F16B4.4)
232	WBGene00000841	Cullin-6(cul-6)
233	WBGene00021365	hypothetical protein(smgl-2)
234	WBGene00021346	hypothetical protein(Y37E3.1)
235	WBGene00021277	hypothetical protein(Y23H5B.6)
236	WBGene00004809	SKp1 Related (ubiquitin ligase complex component)(skr-3)
237	WBGene00003836	NTF2-related eXporT protein(nxt-1)
238	WBGene00010825	hypothetical protein(M01G12.14)
239	WBGene00007400	Protein BUD31 homolog(C07A9.2)
240	WBGene00003019	hypothetical protein(lin-33)
241	WBGene00009319	MethylCrotonoyl-Coenzyme A Carboxylase (alpha)(mccc-1)
242	WBGene00009939	Zinc finger putative Transcription Factor family(ztf-11)
243	WBGene00006611	Trehalase(tre-5)
244	WBGene00010084	hypothetical protein(F55B11.2)
245	WBGene00022182	SWI/SNF nucleosome remodeling complex component(swsn-3)
246	WBGene00022488	ORC (Origin Recognition Complex) subunit(orc-3)
247	WBGene00000435	Homeobox protein ceh-10(ceh-10)
248	WBGene00000416	Cell death abnormality protein 2(ced-2)
249	WBGene00000556	CaeNaCin (Caenorhabditis bacteriocin)(cnc-2)
250	WBGene00018145	Protein F37C4.5(F37C4.5)
251	WBGene00000784	Cathepsin B-like cysteine proteinase 4(cpr-4)
252	WBGene00004205	Bifunctional arginine demethylase and lysyl-hydroxylase psr-1(psr-1)
253	WBGene00022358	E3 ubiquitin-protein ligase(Y92H12A.2)
254	WBGene00022644	Downstream Of DAF-16 (regulated by DAF-16)(dod-19)
255	WBGene00000857	Protein Wnt-1(cwn-1)
256	WBGene00012557	hypothetical protein(Y37D8A.19)
257	WBGene00008378	hypothetical protein(D1054.11)
258	WBGene00007139	Matrix non-peptidase homolog 1(mnp-1)
259	WBGene00004442	60S ribosomal protein L28(rpl-28)

## Sheet: MetaWorm GSEA
whole worm day 7 vs whole worm day 1:
	GS DETAILS	SIZE	ES	NES	NOM p-val	FDR q-val	FWER p-val	RANK AT MAX	LEADING EDGE
	UPREGULATED_WITH_AGEING	260	0.67	2.03	0	0	0	1172	tags=27%, list=6%, signal=29%
	GS DETAILS	SIZE	ES	NES	NOM p-val	FDR q-val	FWER p-val	RANK AT MAX	LEADING EDGE
	DOWNREGULATED_WITH_AGEING	67	-0.88	-2.19	0	0	0	914	tags=48%, list=5%, signal=50%
GFP21 day 7 vs day 1
	GS DETAILS	SIZE	ES	NES	NOM p-val	FDR q-val	FWER p-val	RANK AT MAX	LEADING EDGE
	UPREGULATED_WITH_AGEING	247	0.68	2.06	0	0	0	1927	tags=36%, list=11%, signal=39%
	GS DETAILS	SIZE	ES	NES	NOM p-val	FDR q-val	FWER p-val	RANK AT MAX	LEADING EDGE
	DOWNREGULATED_WITH_AGEING	62	-0.54	-1.46	0.035	0.021	0.044	2353	tags=27%, list=14%, signal=32%
GFP7 day 7 vs day 1
	GS DETAILS	SIZE	ES	NES	NOM p-val	FDR q-val	FWER p-val	RANK AT MAX	LEADING EDGE
	UPREGULATED_WITH_AGEING	238	0.68	2.01	0	0	0	2289	tags=37%, list=14%, signal=42%
	GS DETAILS	SIZE	ES	NES	NOM p-val	FDR q-val	FWER p-val	RANK AT MAX	LEADING EDGE
	DOWNREGULATED_WITH_AGEING	60	-0.5	-1.35	0.063	0.049	0.096	842	tags=12%, list=5%, signal=12%
