# Supplementary material for: High neural activity accelerates the decline of cognitive plasticity with age in Caenorhabditis elegans
Source: eLife. 2020 Nov 24;9:e59711. doi: 10.7554/eLife.59711 (PMC7685709; doi:10.7554/eLife.59711)
Supplement: Supplementary file 8. [file elife-59711-supp8.xlsx]

## Sheet: z-score
© 2000-2019 QIAGEN. All rights reserved.
Canonical Pathways	GFP21_D1_VS_GFP7_D1	GFP21_D7_VS_GFP7_D7	GFP21_D7_VS_GFP21_D1	GFP7_D7_VS_GFP7_D1
EIF2 Signaling	-3.098	-2.582	4.906	4.906
cAMP-mediated signaling	0.149	2.534	-4.621	-4.621
Dopamine-DARPP32 Feedback in cAMP Signaling	1.298	2.596	-3.893	-3.893
Actin Cytoskeleton Signaling	-0.146	-3.938	2.188	4.522
tRNA Charging	-1.732	-1.732	3.657	3.657
Actin Nucleation by ARP-WASP Complex	-0.218	-2.837	2.837	3.71
Paxillin Signaling	-0.707	-3.182	1.768	3.536
Integrin Signaling	-0.397	-3.576	1.722	2.782
Cell Cycle Control of Chromosomal Replication	-3.128	2.294	0.626	-2.294
Regulation of Actin-based Motility by Rho	-1.043	-3.128	1.46	2.711
Androgen Signaling	0.775	2.324	-2.324	-2.84
Protein Kinase A Signaling	0.611	1.1	-3.299	-3.054
Relaxin Signaling	1.886	1.886	-2.357	-1.886
Insulin Receptor Signaling	0.973	-1.622	2.271	2.92
HIPPO signaling	1.897	-1.265	1.897	2.53
RAN Signaling	-1.89	-2.646	1.134	1.89
ILK Signaling	-1.521	-2.197	1.859	1.859
Calcium Signaling	-0.577	0.962	-3.657	-2.117
Corticotropin Releasing Hormone Signaling	1.4	0.2	-3	-2.6
Signaling by Rho Family GTPases	-1.718	-2.655	1.093	1.718
Nitric Oxide Signaling in the Cardiovascular System	1.043	2.294	-1.877	-1.877
GPCR-Mediated Nutrient Sensing in Enteroendocrine Cells	0.626	1.043	-2.711	-2.711
Synaptic Long Term Potentiation	-0.333	1.333	-3	-2.333
Glycolysis I	2.53	0.632	-1.897	-1.897
eNOS Signaling	0.378	1.134	-2.646	-2.646
Unfolded protein response	-1.043	-0.626	2.294	2.711
Remodeling of Epithelial Adherens Junctions	-0.905	-1.508	2.111	2.111
Agrin Interactions at Neuromuscular Junction	-0.471	-2.357	0.943	2.828
Fcγ Receptor-mediated Phagocytosis in Macrophages and Monocytes	-0.822	-2.466	0.822	2.466
CREB Signaling in Neurons	-0.469	1.093	-2.655	-2.343
Rac Signaling	-1.521	-2.197	0.845	1.859
Glutamate Receptor Signaling	-2.121	1.414	-1.414	-1.414
D-myo-inositol (1,4,5)-Trisphosphate Biosynthesis	-0.632	0.632	-2.53	-2.53
PAK Signaling	-0.392	-2.353	1.177	2.353
Tyrosine Degradation I	-1.342	-1.342	2.236	1.342
Acetyl-CoA Biosynthesis I (Pyruvate Dehydrogenase Complex)	1.342	0.447	-2.236	-2.236
SAPK/JNK Signaling	0	-1.789	1.789	2.683
Tryptophan Degradation III (Eukaryotic)	0.775	-0.775	2.324	2.324
Fatty Acid β-oxidation I	1	-1	1.5	2.5
Neuropathic Pain Signaling In Dorsal Horn Neurons	-0.6	1	-2.2	-2.2
Sperm Motility	0.784	1.177	-2.353	-1.569
BAG2 Signaling Pathway	-1.604	0	2.673	1.604
Regulation of Cellular Mechanics by Calpain Protease	0	-2.138	1.604	2.138
Endocannabinoid Neuronal Synapse Pathway	-1.461	0.73	-1.826	-1.826
Regulation of eIF4 and p70S6K Signaling	0	-1.225	2.041	2.449
Gα12/13 Signaling	-0.816	-1.633	1.225	2.041
Telomerase Signaling	0.816	-0.408	2.041	2.449
Cyclins and Cell Cycle Regulation	0.632	0	2.53	2.53
Gαq Signaling	-0.822	0.822	-2.137	-1.808
Ephrin Receptor Signaling	-0.324	-2.596	0.649	1.947
Cardiac Hypertrophy Signaling (Enhanced)	-0.863	-0.863	-2.157	-1.51
nNOS Signaling in Neurons	-0.447	2.236	-1.342	-1.342
Role of NANOG in Mammalian Embryonic Stem Cell Pluripotency	1.213	-1.213	1.213	1.698
Methionine Degradation I (to Homocysteine)	-1	-1	1	2.333
PPARα/RXRα Activation	-0.164	0.164	-2.137	-2.795
RhoA Signaling	-1.4	-1.4	1	1.4
tRNA Splicing	-1.155	0.577	-1.732	-1.732
Oxidative Phosphorylation	1.298	-1.622	-0.649	1.622
Synaptic Long Term Depression	0.149	0.745	-2.534	-1.64
RhoGDI Signaling	0.898	1.976	-0.539	-1.616
Glutathione Redox Reactions II	0	-1	2	2
Opioid Signaling Pathway	-1.05	-0.263	-2.101	-1.576
Pyridoxal 5'-phosphate Salvage Pathway	1.633	-0.816	-1.633	-0.816
Role of NFAT in Cardiac Hypertrophy	0.429	1.286	-1.857	-1.286
VEGF Signaling	0.218	-1.528	1.091	1.964
PTEN Signaling	0	1.461	-1.461	-1.826
Glutaryl-CoA Degradation	1	-0.333	1.667	1.667
Dopamine Receptor Signaling	-1	-0.333	-1.667	-1.667
Colanic Acid Building Blocks Biosynthesis	2.309	0	1.155	1.155
Apoptosis Signaling	-1.877	-0.209	1.877	0.626
Renal Cell Carcinoma Signaling	0.229	-1.606	0.688	2.065
Salvage Pathways of Pyrimidine Ribonucleotides	1.89	0	-1.89	-0.756
Endoplasmic Reticulum Stress Pathway	-1.89	-0.378	1.134	1.134
Glioma Invasiveness Signaling	-0.5	-1.5	1	1.5
Sphingosine-1-phosphate Signaling	-1.225	-2.041	0.408	0.816
Granzyme B Signaling	0.447	-1.342	1.342	1.342
Mitotic Roles of Polo-Like Kinase	-2.236	0.447	-0.447	-1.342
Superpathway of Methionine Degradation	1.342	-1.789	-0.447	0.894
ERK/MAPK Signaling	1.043	-1.64	-0.447	1.342
Superpathway of Inositol Phosphate Compounds	0	0.832	-1.664	-1.941
Cysteine Biosynthesis III (mammalia)	-0.632	-1.265	0.632	1.897
G Beta Gamma Signaling	-1.095	0	-1.826	-1.461
Apelin Cardiomyocyte Signaling Pathway	-1.095	-1.095	-1.095	-1.095
TCA Cycle II (Eukaryotic)	1.213	1.213	-1.213	-0.728
Mouse Embryonic Stem Cell Pluripotency	1.091	-1.091	0.655	1.528
Melatonin Signaling	0.218	-0.218	-1.964	-1.964
Angiopoietin Signaling	0	-1.604	0.535	2.138
Phosphatidylglycerol Biosynthesis II (Non-plastidic)	-0.535	1.069	1.604	1.069
3-phosphoinositide Biosynthesis	-0.152	1.067	-1.372	-1.677
CDK5 Signaling	0.577	0.577	-1.732	-1.347
Cardiac β-adrenergic Signaling	0	1.134	-1.89	-1.134
PI3K/AKT Signaling	1.372	0	1.029	1.715
Oncostatin M Signaling	1.155	-1.155	0.577	1.155
CDP-diacylglycerol Biosynthesis I	-1.155	0.577	1.732	0.577
P2Y Purigenic Receptor Signaling Pathway	0.73	0.73	-1.461	-1.095
α-Adrenergic Signaling	0.2	-0.2	-2.2	-1.4
Branched-chain α-keto acid Dehydrogenase Complex	2	0	-1	-1
Myo-inositol Biosynthesis	0	2	0	-2
CXCR4 Signaling	-1.622	-1.298	0	0.973
Antioxidant Action of Vitamin C	0.243	0.243	2.183	1.213
D-myo-inositol (1,4,5)-trisphosphate Degradation	-1.134	0.378	-0.378	-1.89
Glycogen Degradation II	1.134	1.89	-0.378	-0.378
GNRH Signaling	-1.029	-0.686	-1.372	-0.686
Triacylglycerol Biosynthesis	-1.069	0.535	1.604	0.535
Synaptogenesis Signaling Pathway	0.465	-1.395	-1.627	-0.232
Tryptophan Degradation to 2-amino-3-carboxymuconate Semialdehyde	-0.447	-0.447	1.342	1.342
GDP-mannose Biosynthesis	1.342	-0.447	1.342	0.447
D-myo-inositol-5-phosphate Metabolism	0.324	0.973	-0.973	-1.298
PFKFB4 Signaling Pathway	0	-1.155	-1.155	-1.155
HGF Signaling	-0.756	-1.134	0.378	1.134
GDNF Family Ligand-Receptor Interactions	0.243	-1.213	0.728	1.213
ATM Signaling	-0.728	0.243	1.698	0.728
Reelin Signaling in Neurons	-0.169	-1.521	0.169	1.521
Endocannabinoid Cancer Inhibition Pathway	-0.557	-0.186	-1.3	-1.3
Apelin Endothelial Signaling Pathway	-0.928	0.186	-1.3	-0.928
ErbB2-ErbB3 Signaling	0.943	-0.471	0.943	0.943
EGF Signaling	-0.471	-0.943	0.943	0.943
NAD Phosphorylation and Dephosphorylation	0	-1.633	0	1.633
Role of BRCA1 in DNA Damage Response	-1.633	0	0	-1.633
ErbB Signaling	-0.539	-1.257	0.539	0.898
FGF Signaling	0.688	-1.606	-0.688	-0.229
IGF-1 Signaling	-0.6	-0.6	1	1
Isoleucine Degradation I	1.265	-0.632	-0.632	0.632
Non-Small Cell Lung Cancer Signaling	0.447	-0.894	0.894	0.894
Thrombin Signaling	-0.781	-1.406	0.469	0.469
FcγRIIB Signaling in B Lymphocytes	-0.258	-0.258	1.291	1.291
Leucine Degradation I	0.378	1.134	-1.134	0.378
IL-2 Signaling	1	-0.5	0.5	1
Growth Hormone Signaling	0	0.5	-1	-1.5
JAK/Stat Signaling	1	-0.5	0.5	1
Glioblastoma Multiforme Signaling	0.333	-2	0	0.667
BMP signaling pathway	0.728	-1.213	-0.243	0.728
Ephrin B Signaling	0.243	-1.698	-0.243	0.728
Melanocyte Development and Pigmentation Signaling	1.225	-0.816	-0.816	0
NRF2-mediated Oxidative Stress Response	1.061	-1.061	0	0.707
Glycogen Degradation III	0.707	2.121	0	0
CNTF Signaling	0.471	-0.943	0.471	0.943
NER Pathway	-1.406	-0.156	0.781	-0.469
PDGF Signaling	0.6	-1	0.2	1
Stearate Biosynthesis I (Animals)	-0.277	-0.832	0.832	0.832
Endometrial Cancer Signaling	0.688	-0.688	0.688	0.688
Senescence Pathway	0.687	0.412	-0.687	-0.962
CD28 Signaling in T Helper Cells	0	-0.784	0.784	1.177
D-myo-inositol (1,4,5,6)-Tetrakisphosphate Biosynthesis	0.343	0.686	-0.686	-1.029
D-myo-inositol (3,4,5,6)-tetrakisphosphate Biosynthesis	0.343	0.686	-0.686	-1.029
Acute Myeloid Leukemia Signaling	0.447	-0.894	0.447	0.894
3-phosphoinositide Degradation	0.333	1	-0.667	-0.667
Endocannabinoid Developing Neuron Pathway	-0.378	-1.134	0.378	0.756
Gαi Signaling	0	0	-1.512	-1.134
p70S6K Signaling	-0.16	-0.801	0.801	0.801
Neurotrophin/TRK Signaling	-0.853	-0.853	0.426	0.426
FLT3 Signaling in Hematopoietic Progenitor Cells	0.426	-0.853	0.426	0.853
Aryl Hydrocarbon Receptor Signaling	0	1	1	-0.5
Pyrimidine Ribonucleotides De Novo Biosynthesis	-1.5	0.5	0	-0.5
Adrenomedullin signaling pathway	0.469	-0.469	-0.781	-0.781
Phosphatidylethanolamine Biosynthesis II	-0.816	0.816	0	-0.816
Fc Epsilon RI Signaling	0.522	-0.522	0.522	0.87
B Cell Receptor Signaling	-0.174	-0.87	0.522	0.87
Cardiac Hypertrophy Signaling	-0.405	-0.405	-0.944	-0.674
UVB-Induced MAPK Signaling	0.243	0.243	-1.213	-0.728
IL-3 Signaling	1	0.6	-0.6	0.2
Endothelin-1 Signaling	-0.447	-0.745	-1.043	-0.149
GM-CSF Signaling	0.471	-0.471	0.471	0.943
Cholecystokinin/Gastrin-mediated Signaling	-0.192	-1.347	0.192	0.577
Renin-Angiotensin Signaling	-0.378	-1.134	0	0.756
Sirtuin Signaling Pathway	-1	0.25	0.25	-0.75
Macropinocytosis Signaling	-0.894	-0.447	0	0.894
Role of CHK Proteins in Cell Cycle Checkpoint Control	-0.277	0.832	0.277	-0.832
14-3-3-mediated Signaling	0.365	0	-1.095	-0.73
Inhibition of ARE-Mediated mRNA Degradation Pathway	0.539	-0.18	-0.539	-0.898
Superpathway of D-myo-inositol (1,4,5)-trisphosphate Metabolism	-0.707	0	0	-1.414
Cell Cycle: G2/M DNA Damage Checkpoint Regulation	-0.258	-0.258	-0.775	-0.775
Valine Degradation I	0.775	-0.775	0.258	0.258
Pyrimidine Ribonucleotides Interconversion	-1.291	0.258	-0.258	-0.258
Glioma Signaling	0.408	0.408	-0.816	-0.408
Tec Kinase Signaling	-0.2	-0.6	-0.2	1
2-ketoglutarate Dehydrogenase Complex	1	0	0	1
NGF Signaling	-0.192	-0.962	-0.192	0.577
Phospholipase C Signaling	-0.16	-0.48	-1.121	-0.16
mTOR Signaling	-0.316	-0.632	-0.316	0.632
UVC-Induced MAPK Signaling	0.471	0.471	-0.943	0
Role of NFAT in Regulation of the Immune Response	0.73	-0.73	-0.365	0
IL-1 Signaling	0.302	0.302	-0.302	-0.905
UVA-Induced MAPK Signaling	0.447	-0.894	-0.447	0
Thrombopoietin Signaling	1.091	-0.218	-0.218	0.218
LPS-stimulated MAPK Signaling	-0.426	-0.426	-0.426	0.426
Prolactin Signaling	1.043	-0.209	0.209	0.209
Amyloid Processing	0.277	0.277	-0.277	-0.832
IL-8 Signaling	-0.822	-0.164	-0.493	-0.164
Huntington's Disease Signaling	-0.649	-0.324	0.324	-0.324
Antiproliferative Role of Somatostatin Receptor 2	0.258	0.258	0.258	0.775
PI3K Signaling in B Lymphocytes	-0.192	-0.577	-0.577	-0.192
Aldosterone Signaling in Epithelial Cells	0	-0.365	-0.365	-0.73
GPCR-Mediated Integration of Enteroendocrine Signaling Exemplified by an L Cell	0.243	0.728	0.243	0.243
Chemokine Signaling	-0.471	0	-0.943	0
Apelin Adipocyte Signaling Pathway	-0.943	0	0	-0.471
fMLP Signaling in Neutrophils	0.174	-0.174	0.174	0.87
NF-κB Activation by Viruses	0.229	0.229	0.229	0.688
Amyotrophic Lateral Sclerosis Signaling	-1.342	0	0	0
VEGF Family Ligand-Receptor Interactions	0.853	0	0	0.426
CCR3 Signaling in Eosinophils	0.209	0.209	-0.209	0.626
AMPK Signaling	-0.59	0.295	0	-0.295
Melanoma Signaling	0.535	0	0	0.535
Ovarian Cancer Signaling	0.229	-0.229	-0.229	0.229
Ceramide Signaling	0.426	-0.426	0	0
ErbB4 Signaling	0.209	0.209	0.209	0.209
Neuregulin Signaling	-0.2	-0.2	-0.2	-0.2
Superpathway of Geranylgeranyldiphosphate Biosynthesis I (via Mevalonate)	0	0	0	-0.707
Leptin Signaling in Obesity	0.707	0	0	0
Estrogen-Dependent Breast Cancer Signaling	0	0	0	0.535
Sertoli Cell-Sertoli Cell Junction Signaling	N/A	N/A	N/A	N/A
Xenobiotic Metabolism Signaling	N/A	N/A	N/A	N/A
Ephrin A Signaling	N/A	N/A	N/A	N/A
Virus Entry via Endocytic Pathways	N/A	N/A	N/A	N/A
Iron homeostasis signaling pathway	N/A	N/A	N/A	N/A
CTLA4 Signaling in Cytotoxic T Lymphocytes	N/A	N/A	N/A	N/A
RAR Activation	N/A	N/A	N/A	N/A
Axonal Guidance Signaling	N/A	N/A	N/A	N/A
FAK Signaling	N/A	N/A	N/A	N/A
T Cell Receptor Signaling	N/A	N/A	N/A	N/A
Role of Tissue Factor in Cancer	N/A	N/A	N/A	N/A
Erythropoietin Signaling	N/A	N/A	N/A	N/A
Protein Ubiquitination Pathway	N/A	N/A	N/A	N/A
Docosahexaenoic Acid (DHA) Signaling	N/A	N/A	N/A	N/A
Systemic Lupus Erythematosus Signaling	N/A	N/A	N/A	N/A
DNA Methylation and Transcriptional Repression Signaling	N/A	N/A	N/A	N/A
HIF1α Signaling	N/A	N/A	N/A	N/A
Regulation of the Epithelial-Mesenchymal Transition Pathway	N/A	N/A	N/A	N/A
Cancer Drug Resistance By Drug Efflux	N/A	N/A	N/A	N/A
GABA Receptor Signaling	N/A	N/A	N/A	N/A
Mechanisms of Viral Exit from Host Cells	N/A	N/A	N/A	N/A
Breast Cancer Regulation by Stathmin1	N/A	N/A	N/A	N/A
Semaphorin Signaling in Neurons	N/A	N/A	N/A	N/A
Lipid Antigen Presentation by CD1	N/A	N/A	N/A	N/A
Cleavage and Polyadenylation of Pre-mRNA	N/A	N/A	N/A	N/A
Prostate Cancer Signaling	N/A	N/A	N/A	N/A
Role of MAPK Signaling in the Pathogenesis of Influenza	N/A	N/A	N/A	N/A
Natural Killer Cell Signaling	N/A	N/A	N/A	N/A
Regulation of IL-2 Expression in Activated and Anergic T Lymphocytes	N/A	N/A	N/A	N/A
Gap Junction Signaling	N/A	N/A	N/A	N/A
IL-15 Signaling	N/A	N/A	N/A	N/A
G-Protein Coupled Receptor Signaling	N/A	N/A	N/A	N/A
Caveolar-mediated Endocytosis Signaling	N/A	N/A	N/A	N/A
Serotonin Receptor Signaling	N/A	N/A	N/A	N/A
Myc Mediated Apoptosis Signaling	N/A	N/A	N/A	N/A
IL-17 Signaling	N/A	N/A	N/A	N/A
Germ Cell-Sertoli Cell Junction Signaling	N/A	N/A	N/A	N/A
Assembly of RNA Polymerase II Complex	N/A	N/A	N/A	N/A
Clathrin-mediated Endocytosis Signaling	N/A	N/A	N/A	N/A
Hypoxia Signaling in the Cardiovascular System	N/A	N/A	N/A	N/A
Hereditary Breast Cancer Signaling	N/A	N/A	N/A	N/A
BER pathway	N/A	N/A	N/A	N/A
Estrogen Receptor Signaling	N/A	N/A	N/A	N/A
Adipogenesis pathway	N/A	N/A	N/A	N/A
Chronic Myeloid Leukemia Signaling	N/A	N/A	N/A	N/A
Mitochondrial Dysfunction	N/A	N/A	N/A	N/A
Glucocorticoid Receptor Signaling	N/A	N/A	N/A	N/A
Epithelial Adherens Junction Signaling	N/A	N/A	N/A	N/A
Autophagy	N/A	N/A	N/A	N/A
Phagosome Maturation	N/A	N/A	N/A	N/A
Tight Junction Signaling	N/A	N/A	N/A	N/A
Parkinson's Signaling	N/A	N/A	N/A	N/A
Molecular Mechanisms of Cancer	N/A	N/A	N/A	N/A
Nucleotide Excision Repair Pathway	N/A	N/A	N/A	N/A
Anandamide Degradation	N/A	N/A	N/A	N/A
HER-2 Signaling in Breast Cancer	N/A	N/A	N/A	N/A
Mismatch Repair in Eukaryotes	N/A	N/A	N/A	N/A
