# Supplementary material for: High neural activity accelerates the decline of cognitive plasticity with age in Caenorhabditis elegans
Source: eLife. 2020 Nov 24;9:e59711. doi: 10.7554/eLife.59711 (PMC7685709; doi:10.7554/eLife.59711)
Supplement: Supplementary file 9. [file elife-59711-supp9.xlsx]

## Sheet: RNAi clone number
Gene name	Location
L4440	empty vector control
ccb-1	I-1D21
sol-1	I-3N07
glb-27	II-6A04
nlp-11	II-6N14
unc-86	III-4I08
skn-1	IV-2N18
tax-6	IV-5F13
kdin-1	IV-5H20
ptp-4	IV-5K10
cfp-1	IV-7M02
nra-1	IV-8A10
gcy-25	IV-9F05
ncx-5	V-14E14
cebp-1	X-1O16
dyf-7	X-4F16
nhr-14	X-4G22
mex-3	I-1A23
daf-16	I-5M24
crtc-1	I-9O11
